# Supplementary material for: Synthesis and Stereostructure-Activity Relationship of Novel Pyrethroids Possessing Two Asymmetric Centers on a Cyclopropane Ring
Source: MDPI journal article supplement (doi:10.3390/molecules24061023), 2019-03-14
Supplement: s1 [file s1]

mV

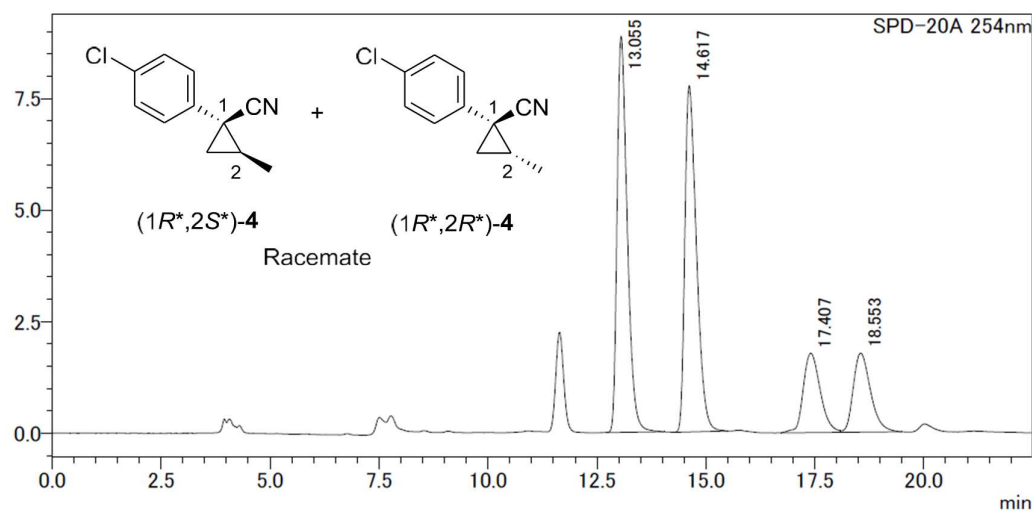

mV

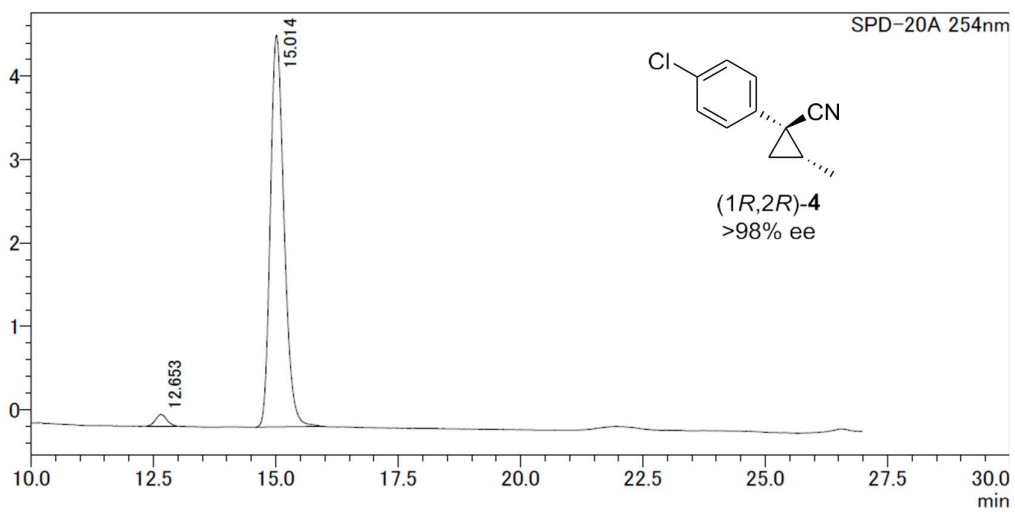

| Peak  | Retention Time | Area  | Height | %     | Unit | Mark | Compounds |
|-------|----------------|-------|--------|-------|------|------|-----------|
| 1     | 3.910          | 1471  | 264    | 0.000 |      |      |           |
| 2     | 3.983          | 1681  | 249    | 0.000 |      | V    |           |
| 3     | 12.635         | 2222  | 140    | 0.000 |      |      |           |
| 4     | 15.014         | 91537 | 4696   | 0.000 |      |      |           |
| Total |                | 96911 | 5349   |       |      |      |           |

mV

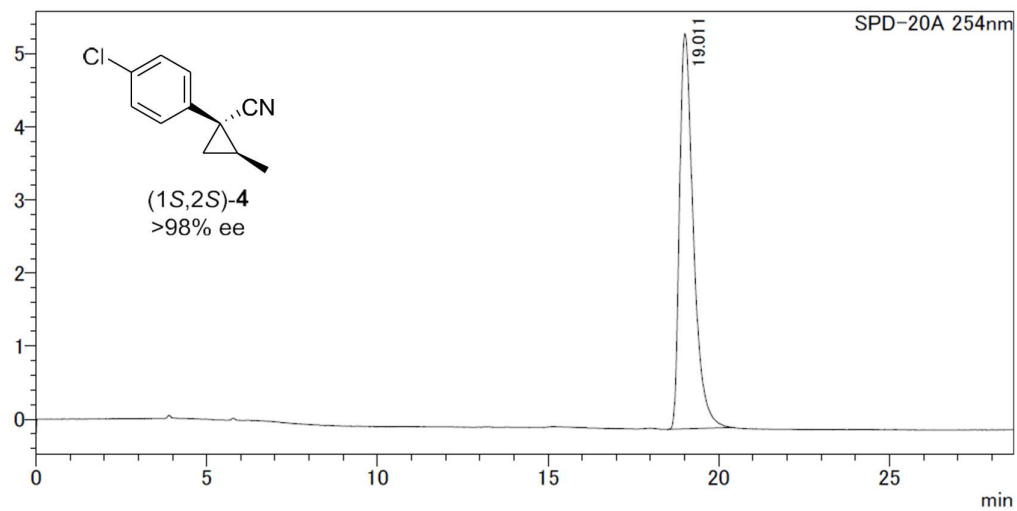

| Peak  | Retention Time | Area   | Height | %     | Unit | Mark | Compounds |
|-------|----------------|--------|--------|-------|------|------|-----------|
| 1     | 19.011         | 152904 | 5403   | 0.000 |      |      |           |
| Total |                | 152904 | 5403   |       |      |      |           |

mV

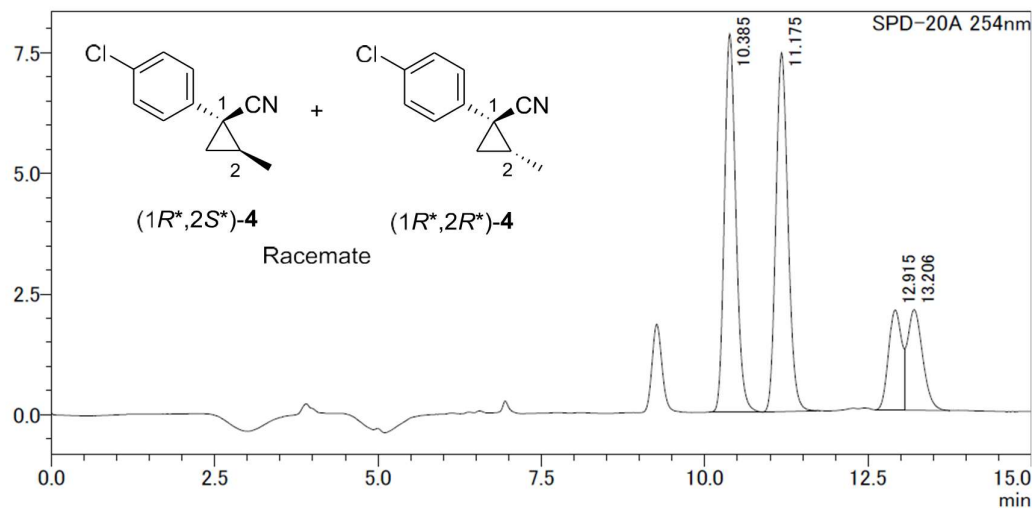

mV

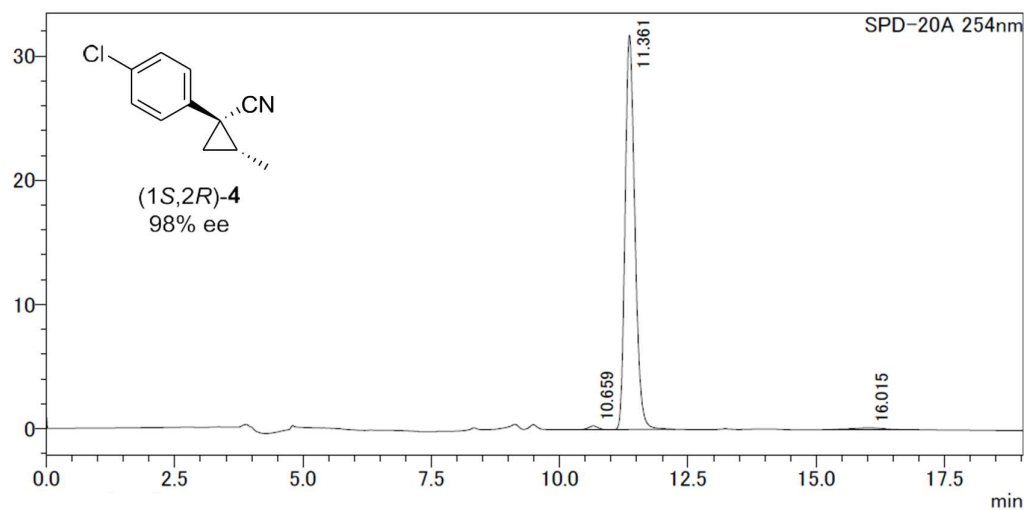

| Peak  | Retention Time | Area   | Height | %      | Unit | Mark | Compounds |
|-------|----------------|--------|--------|--------|------|------|-----------|
| 1     | 10.659         | 3699   | 291    | 0.863  |      | M    |           |
| 2     | 11.361         | 420100 | 31570  | 97.986 |      |      |           |
| 3     | 16.015         | 4938   | 127    | 1.152  |      |      |           |
| Total |                | 428736 | 32168  |        |      |      |           |

mV

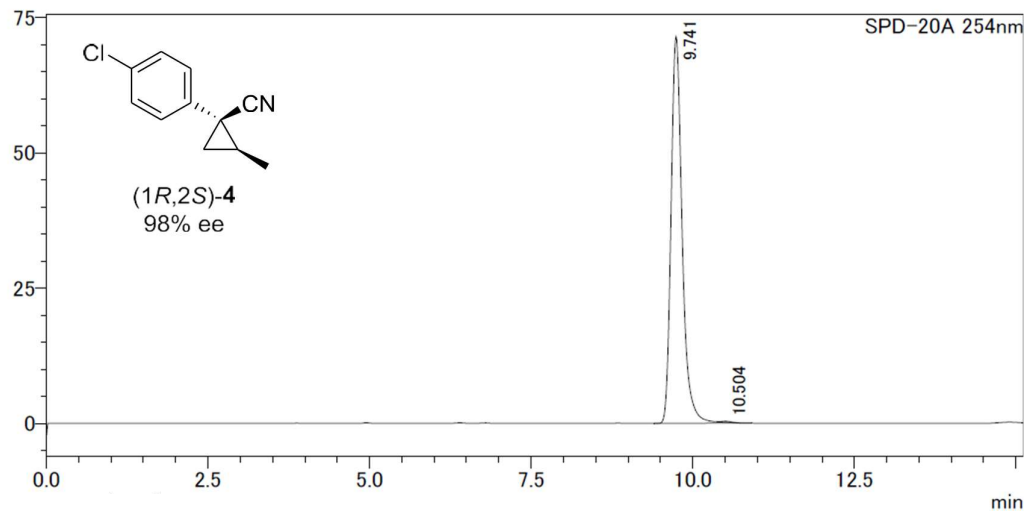

| Peak  | Retention Time | Area   | Height | %      | Unit | Mark | Compounds |
|-------|----------------|--------|--------|--------|------|------|-----------|
| 1     | 9.741          | 852801 | 71434  | 99.809 |      | S    |           |
| 2     | 10.504         | 1634   | 177    | 0.191  |      | T    |           |
| Total |                | 854435 | 71608  |        |      |      |           |
