# Supplementary figures and images for: Synthesis and Stereostructure-Activity Relationship of Novel Pyrethroids Possessing Two Asymmetric Centers on a Cyclopropane Ring
Source: MDPI journal article supplement (doi:10.3390/molecules24061023), 2019-03-14

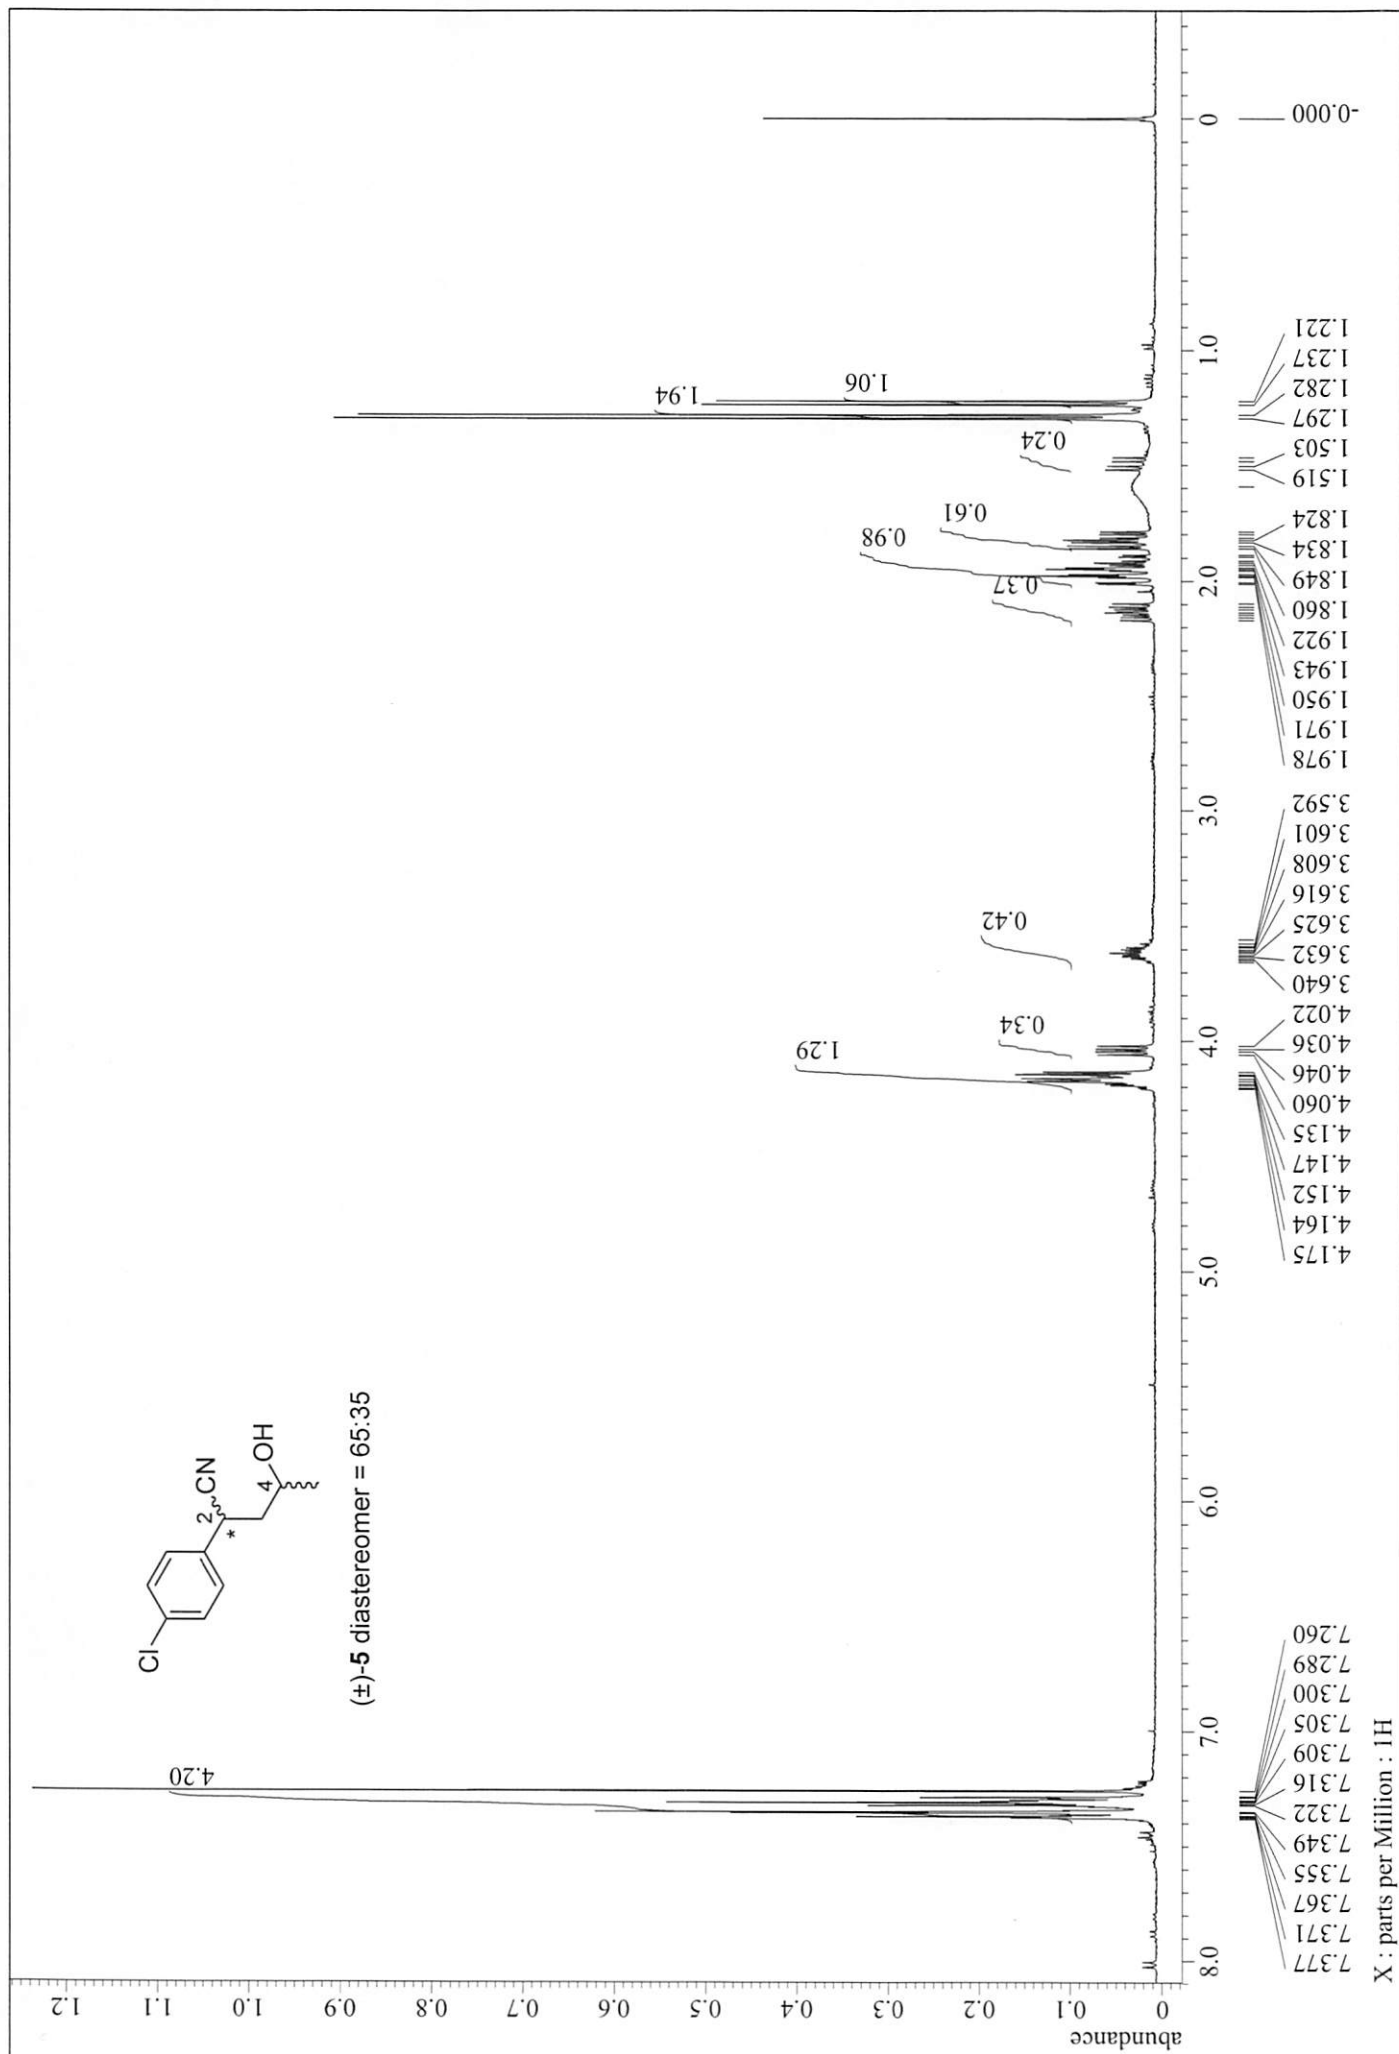

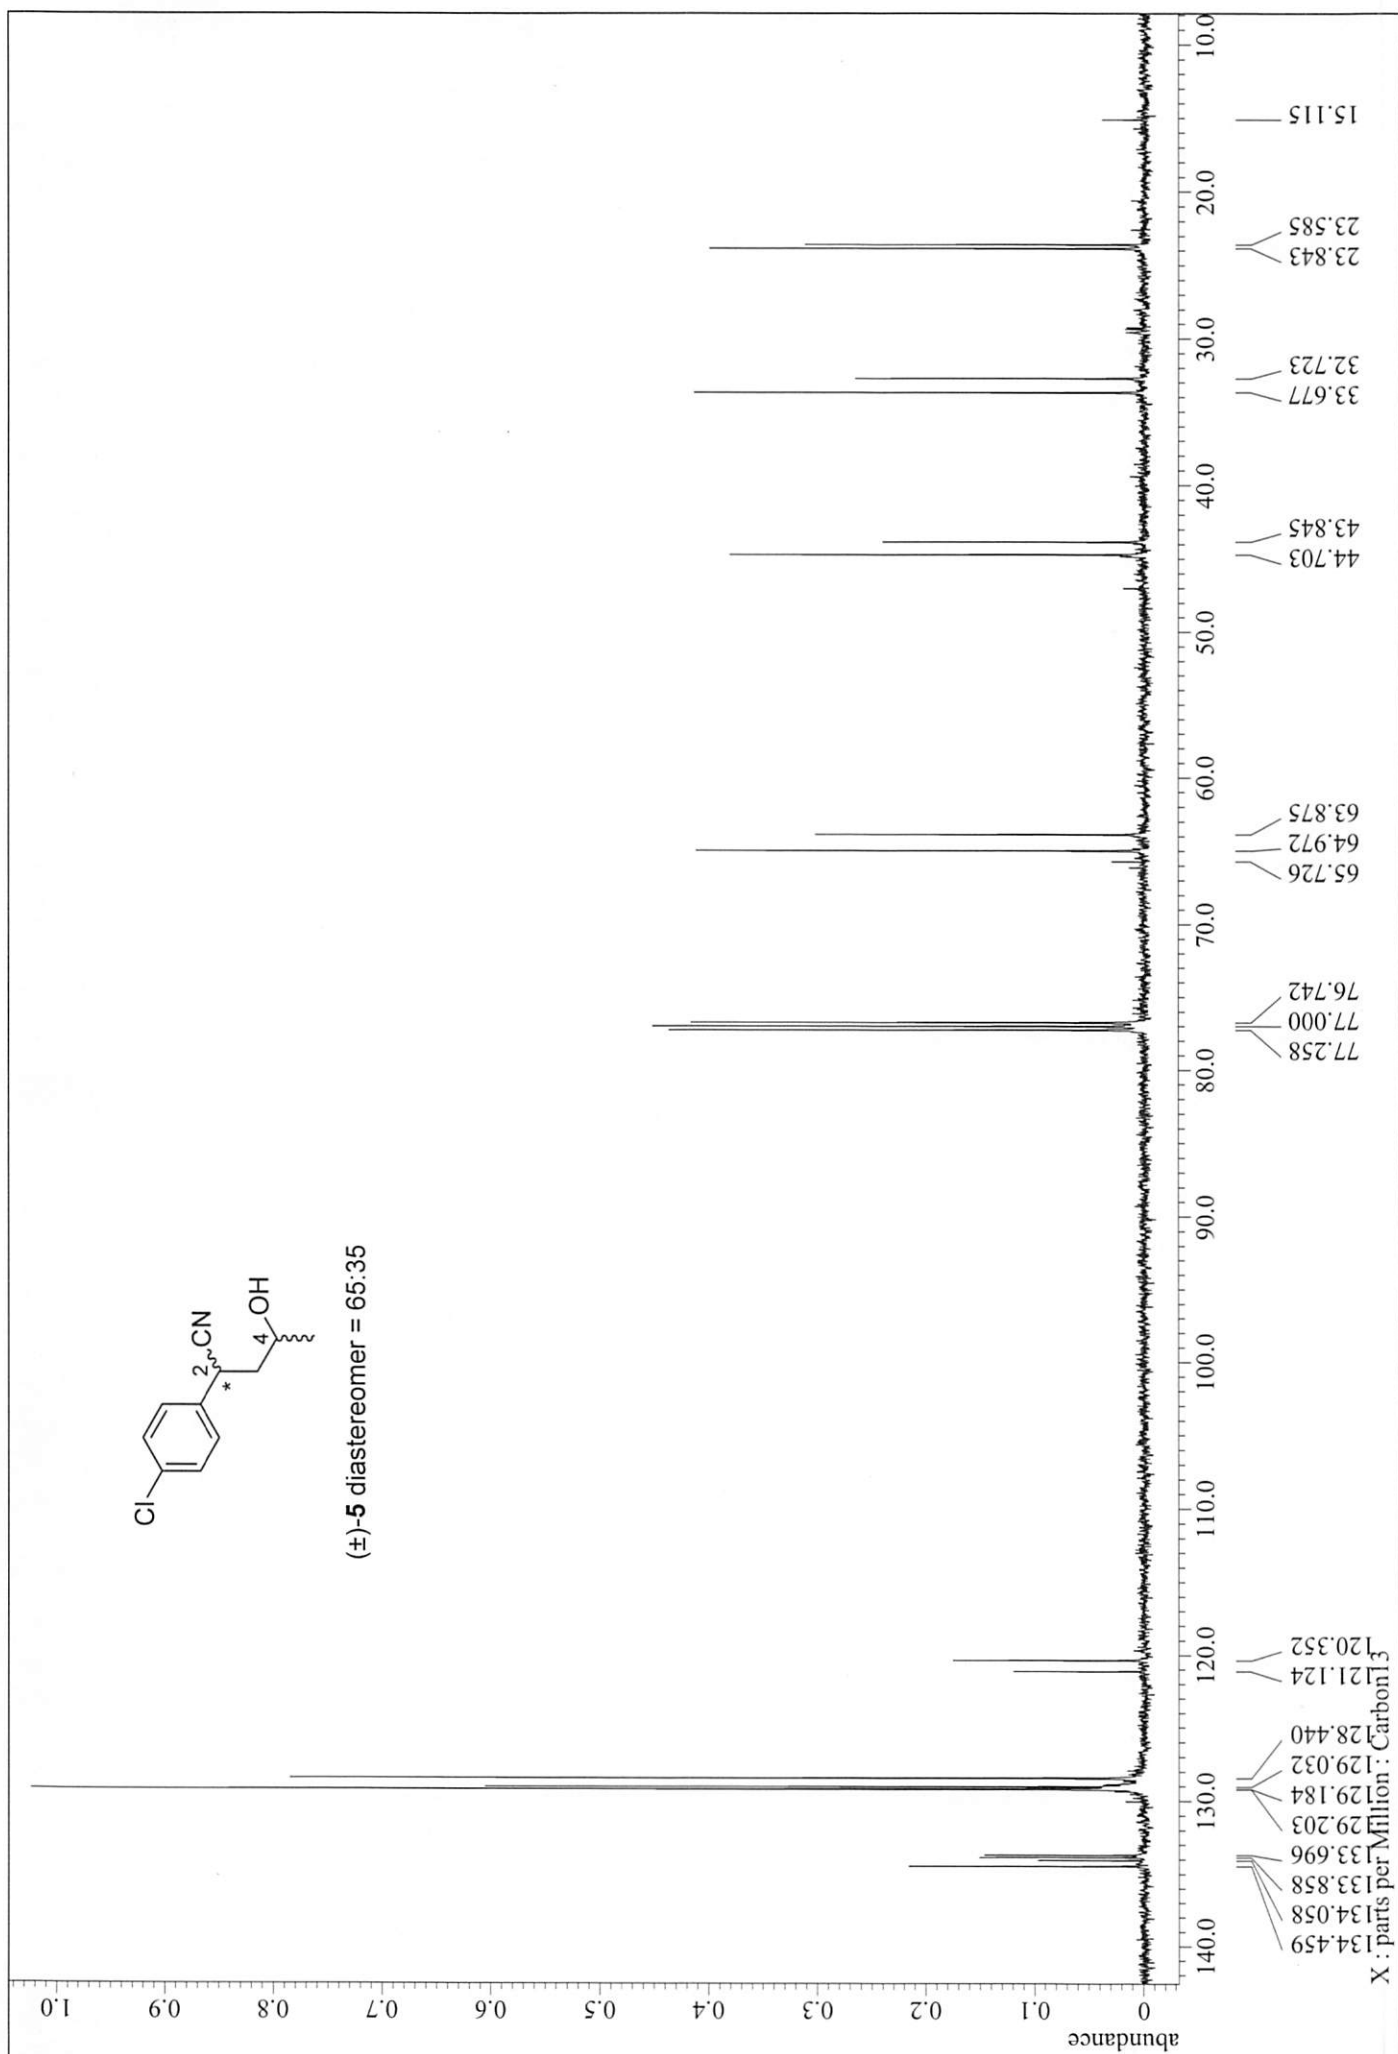

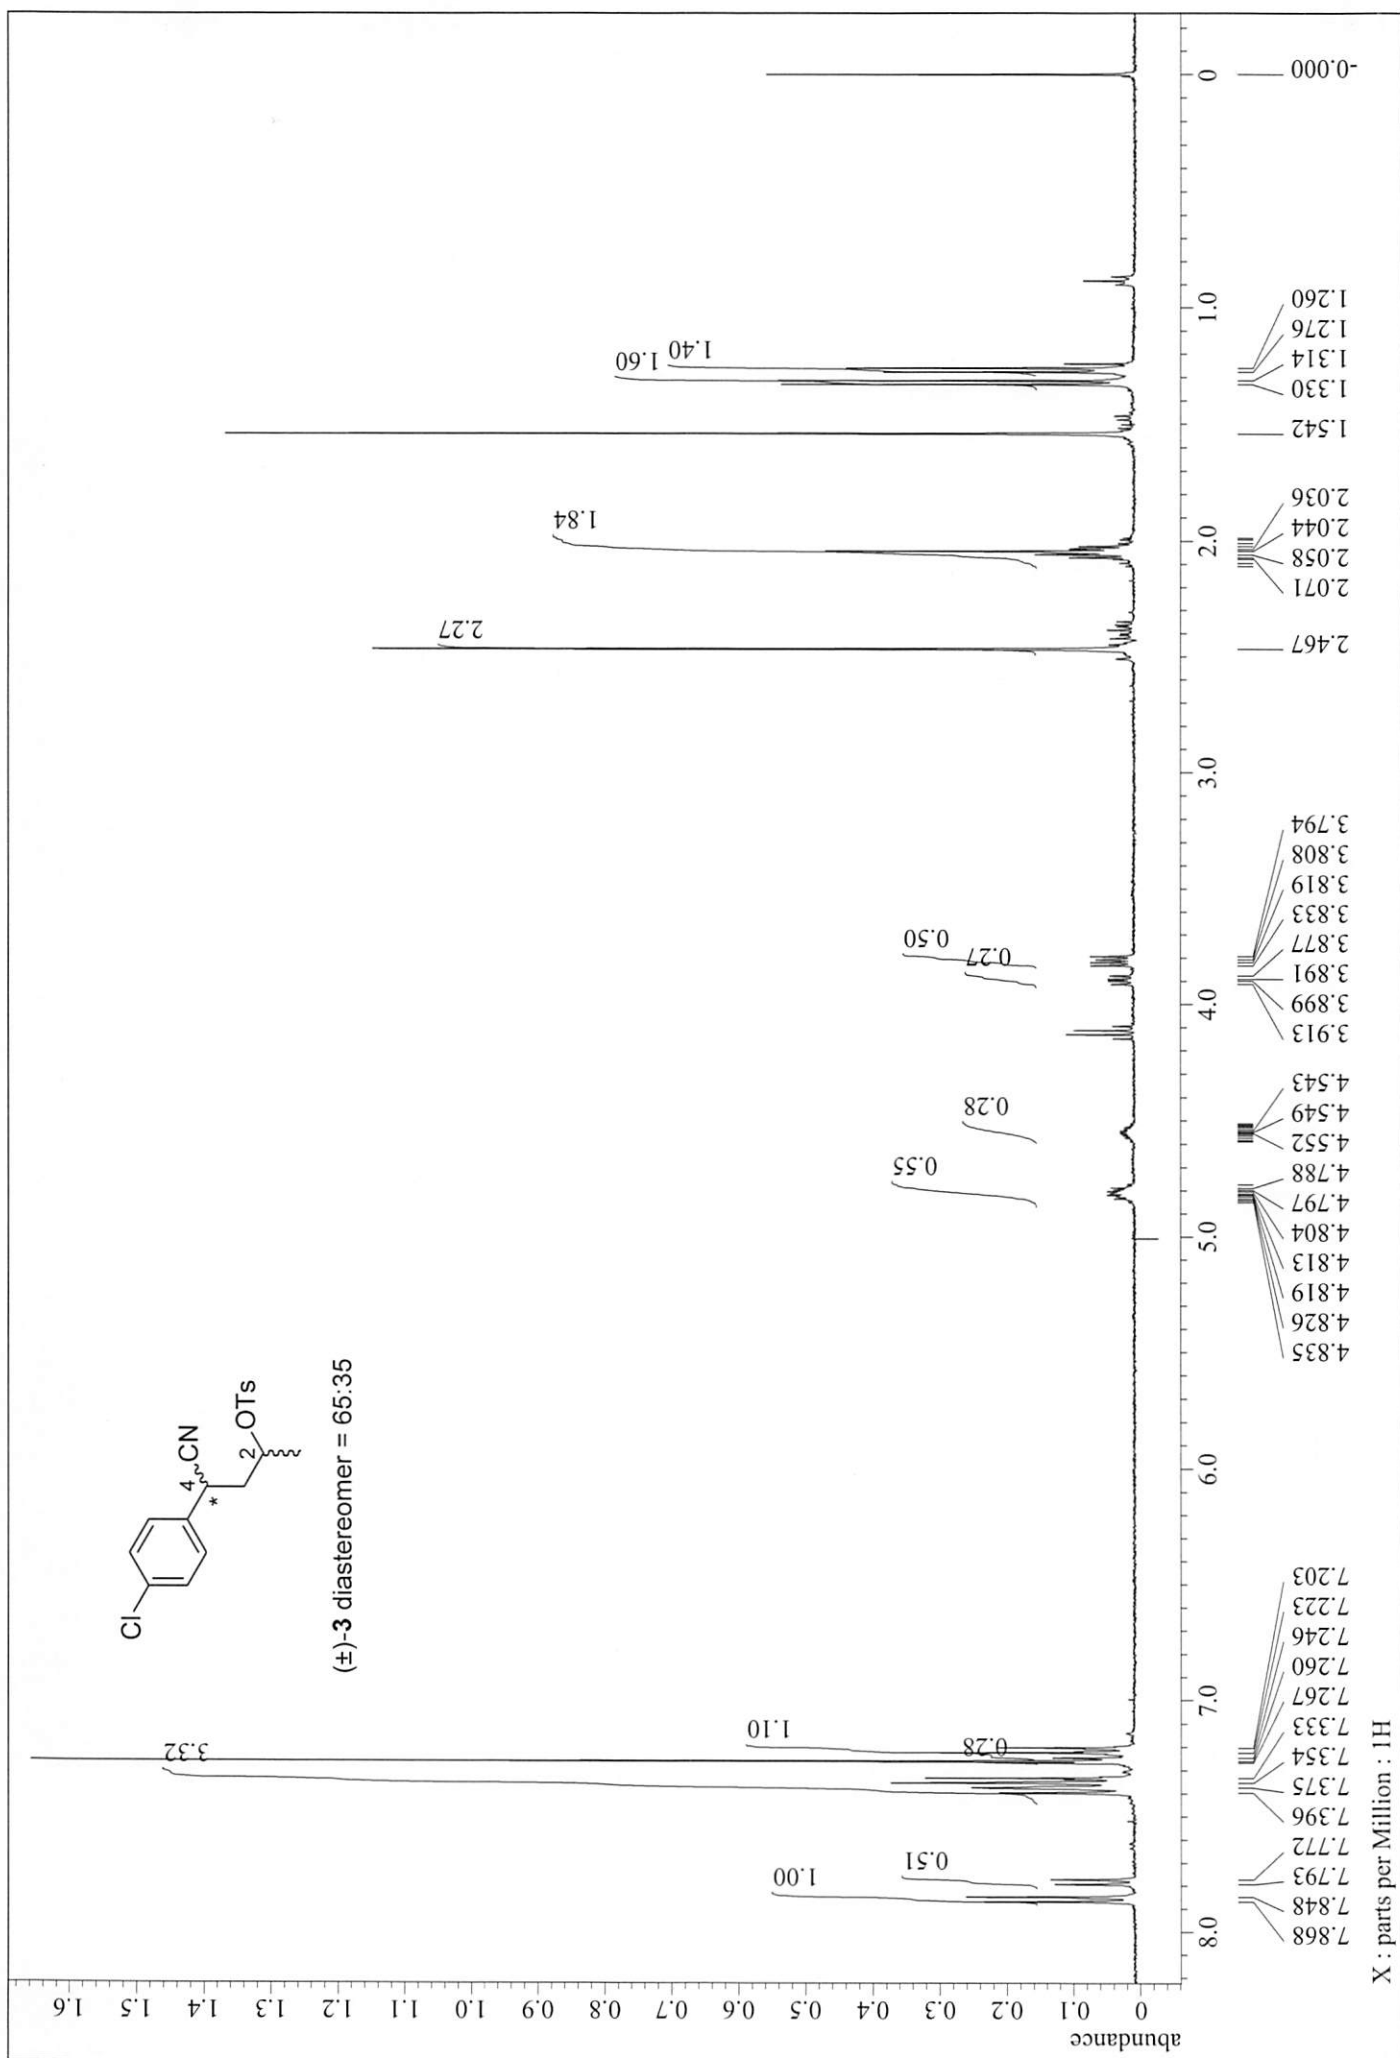

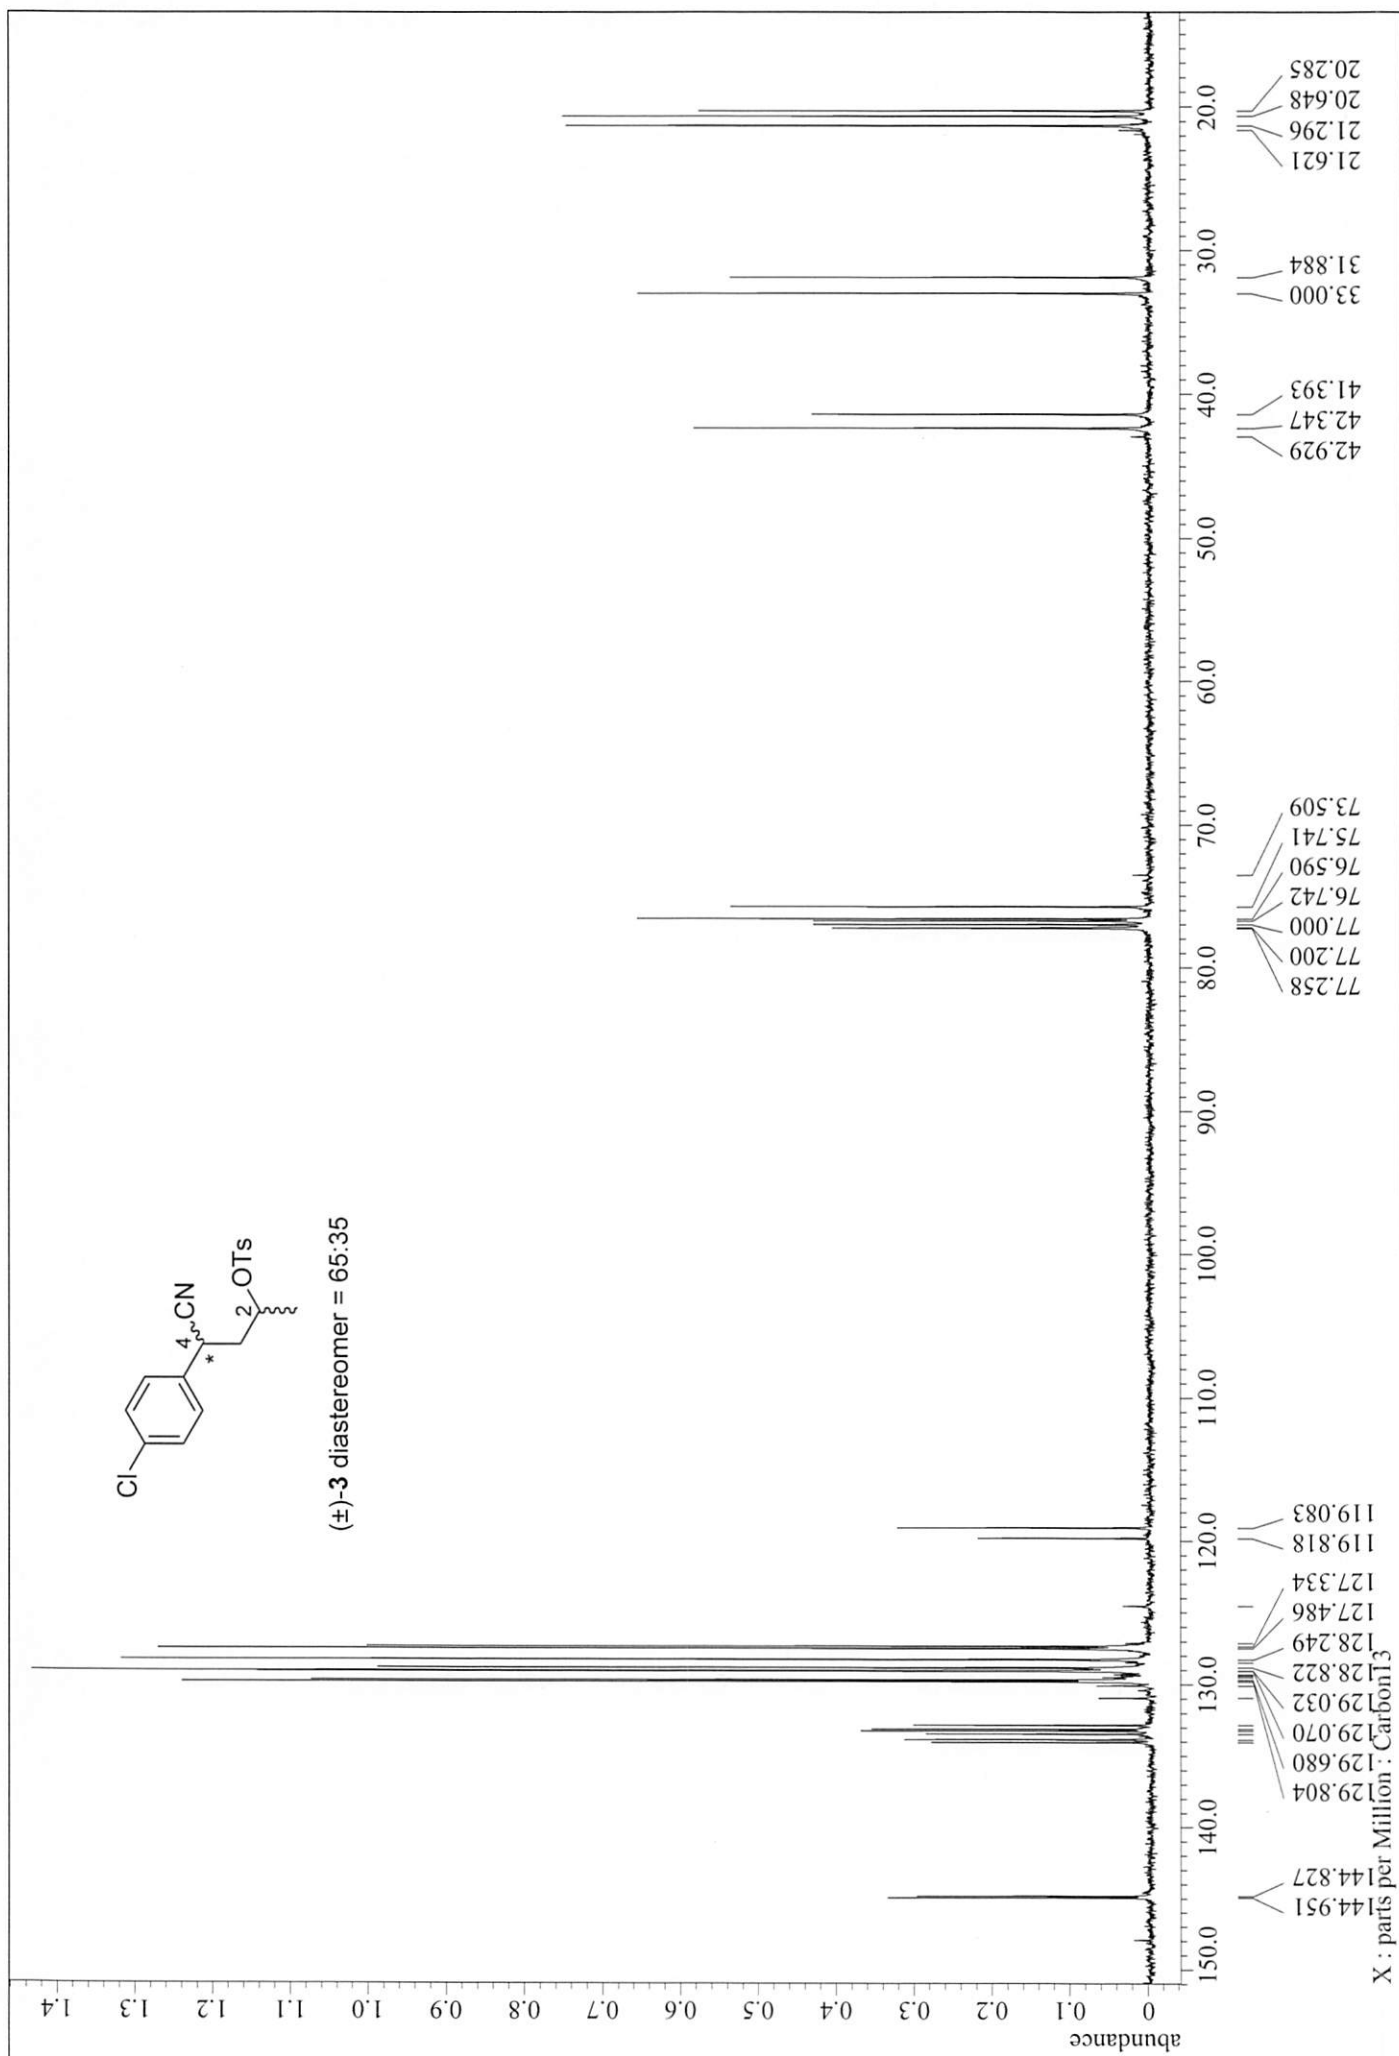

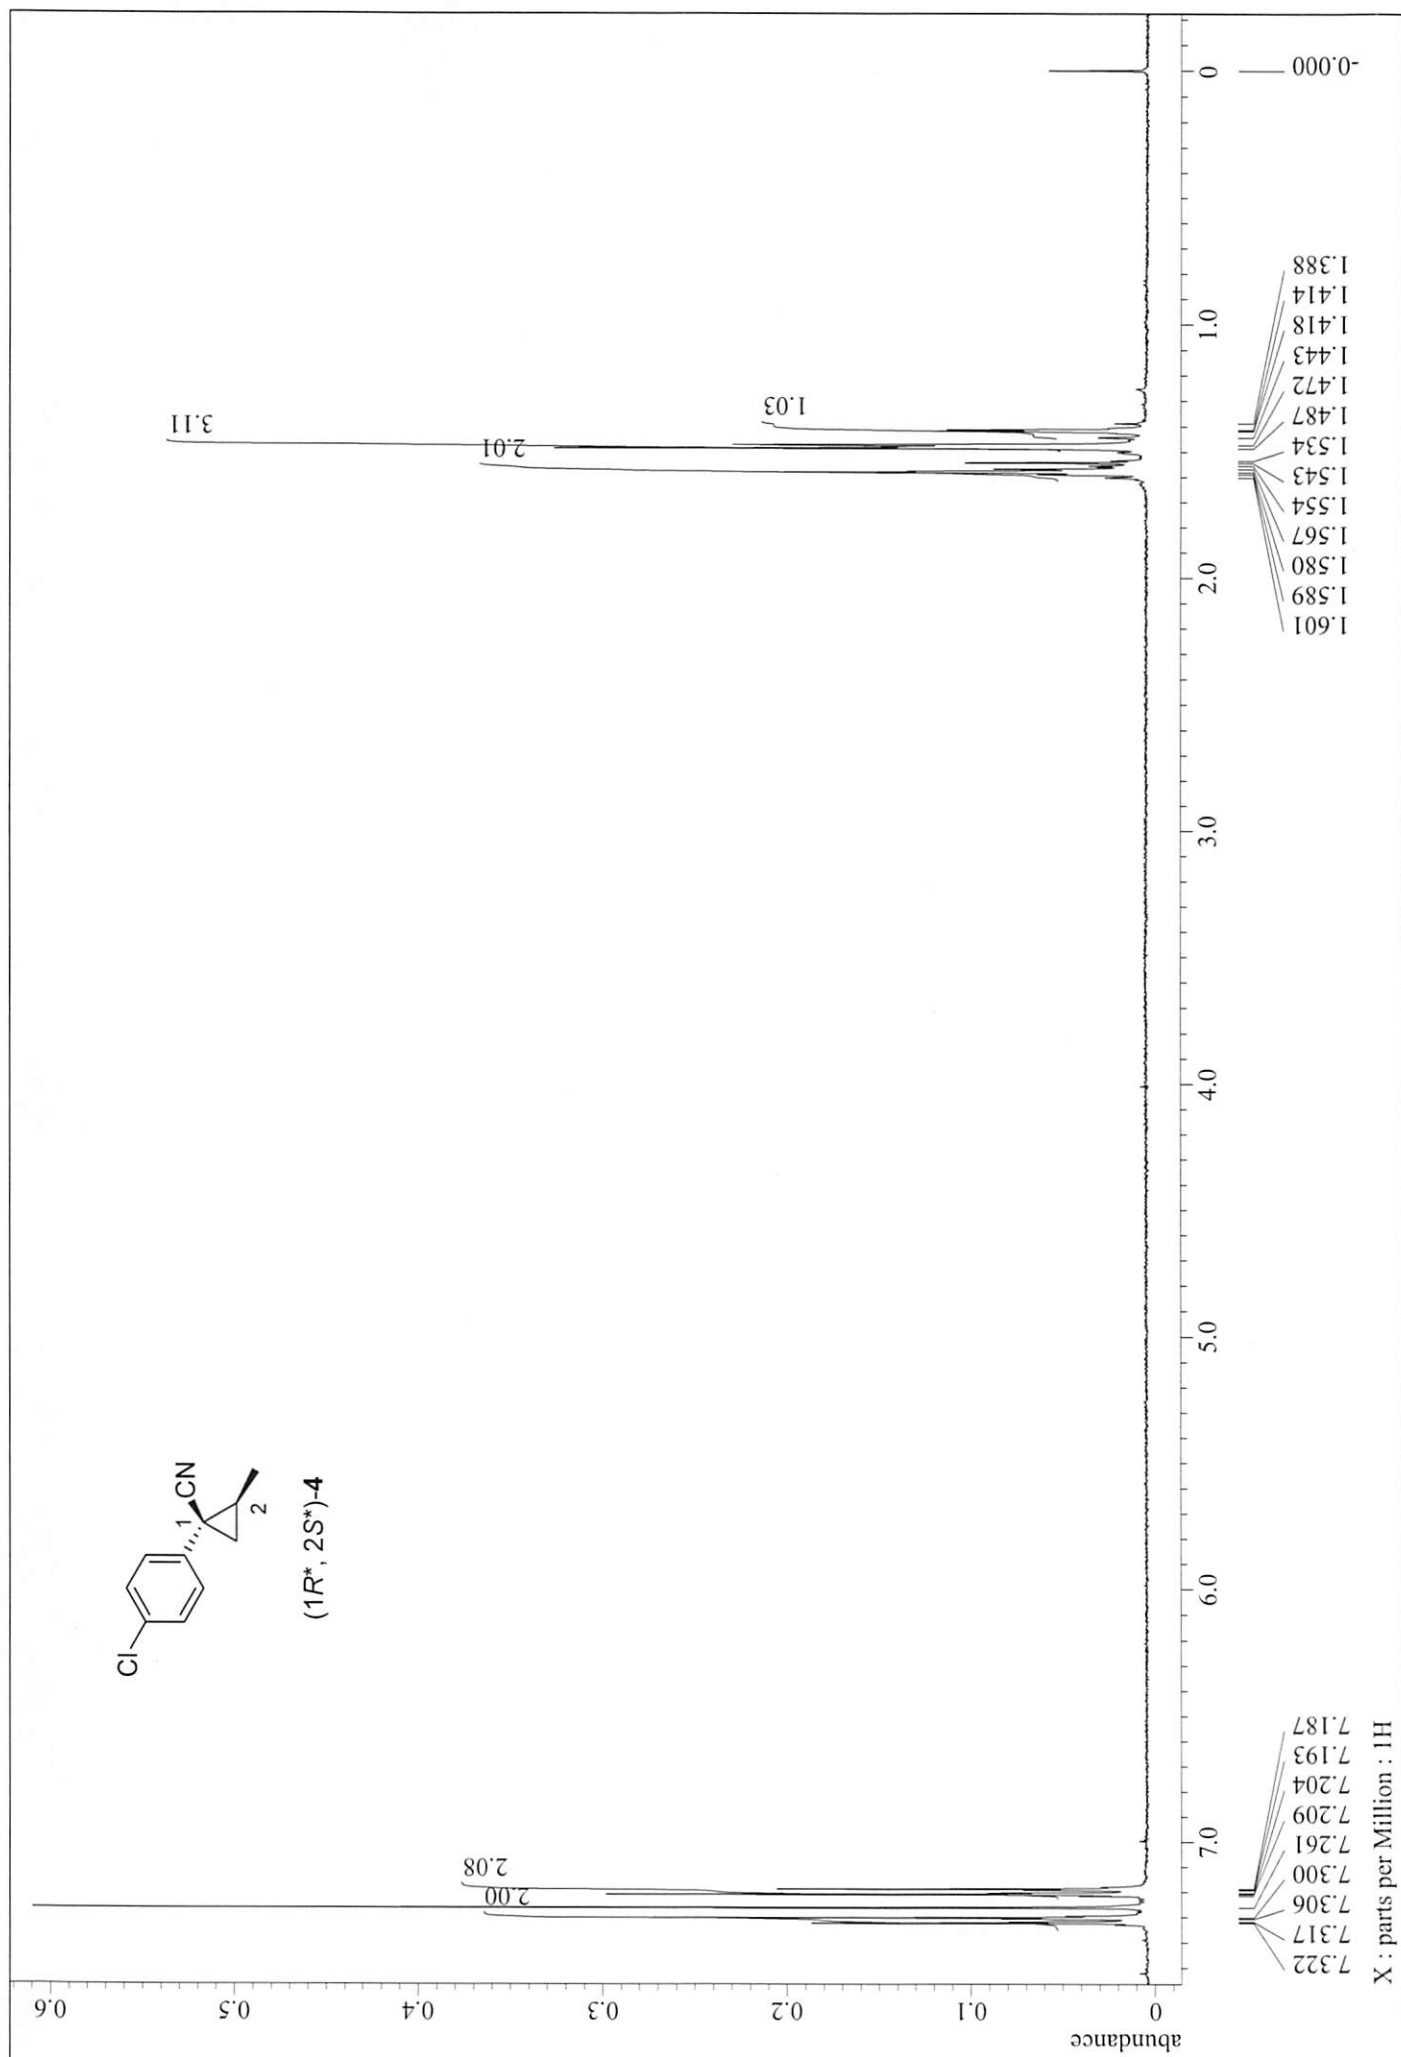

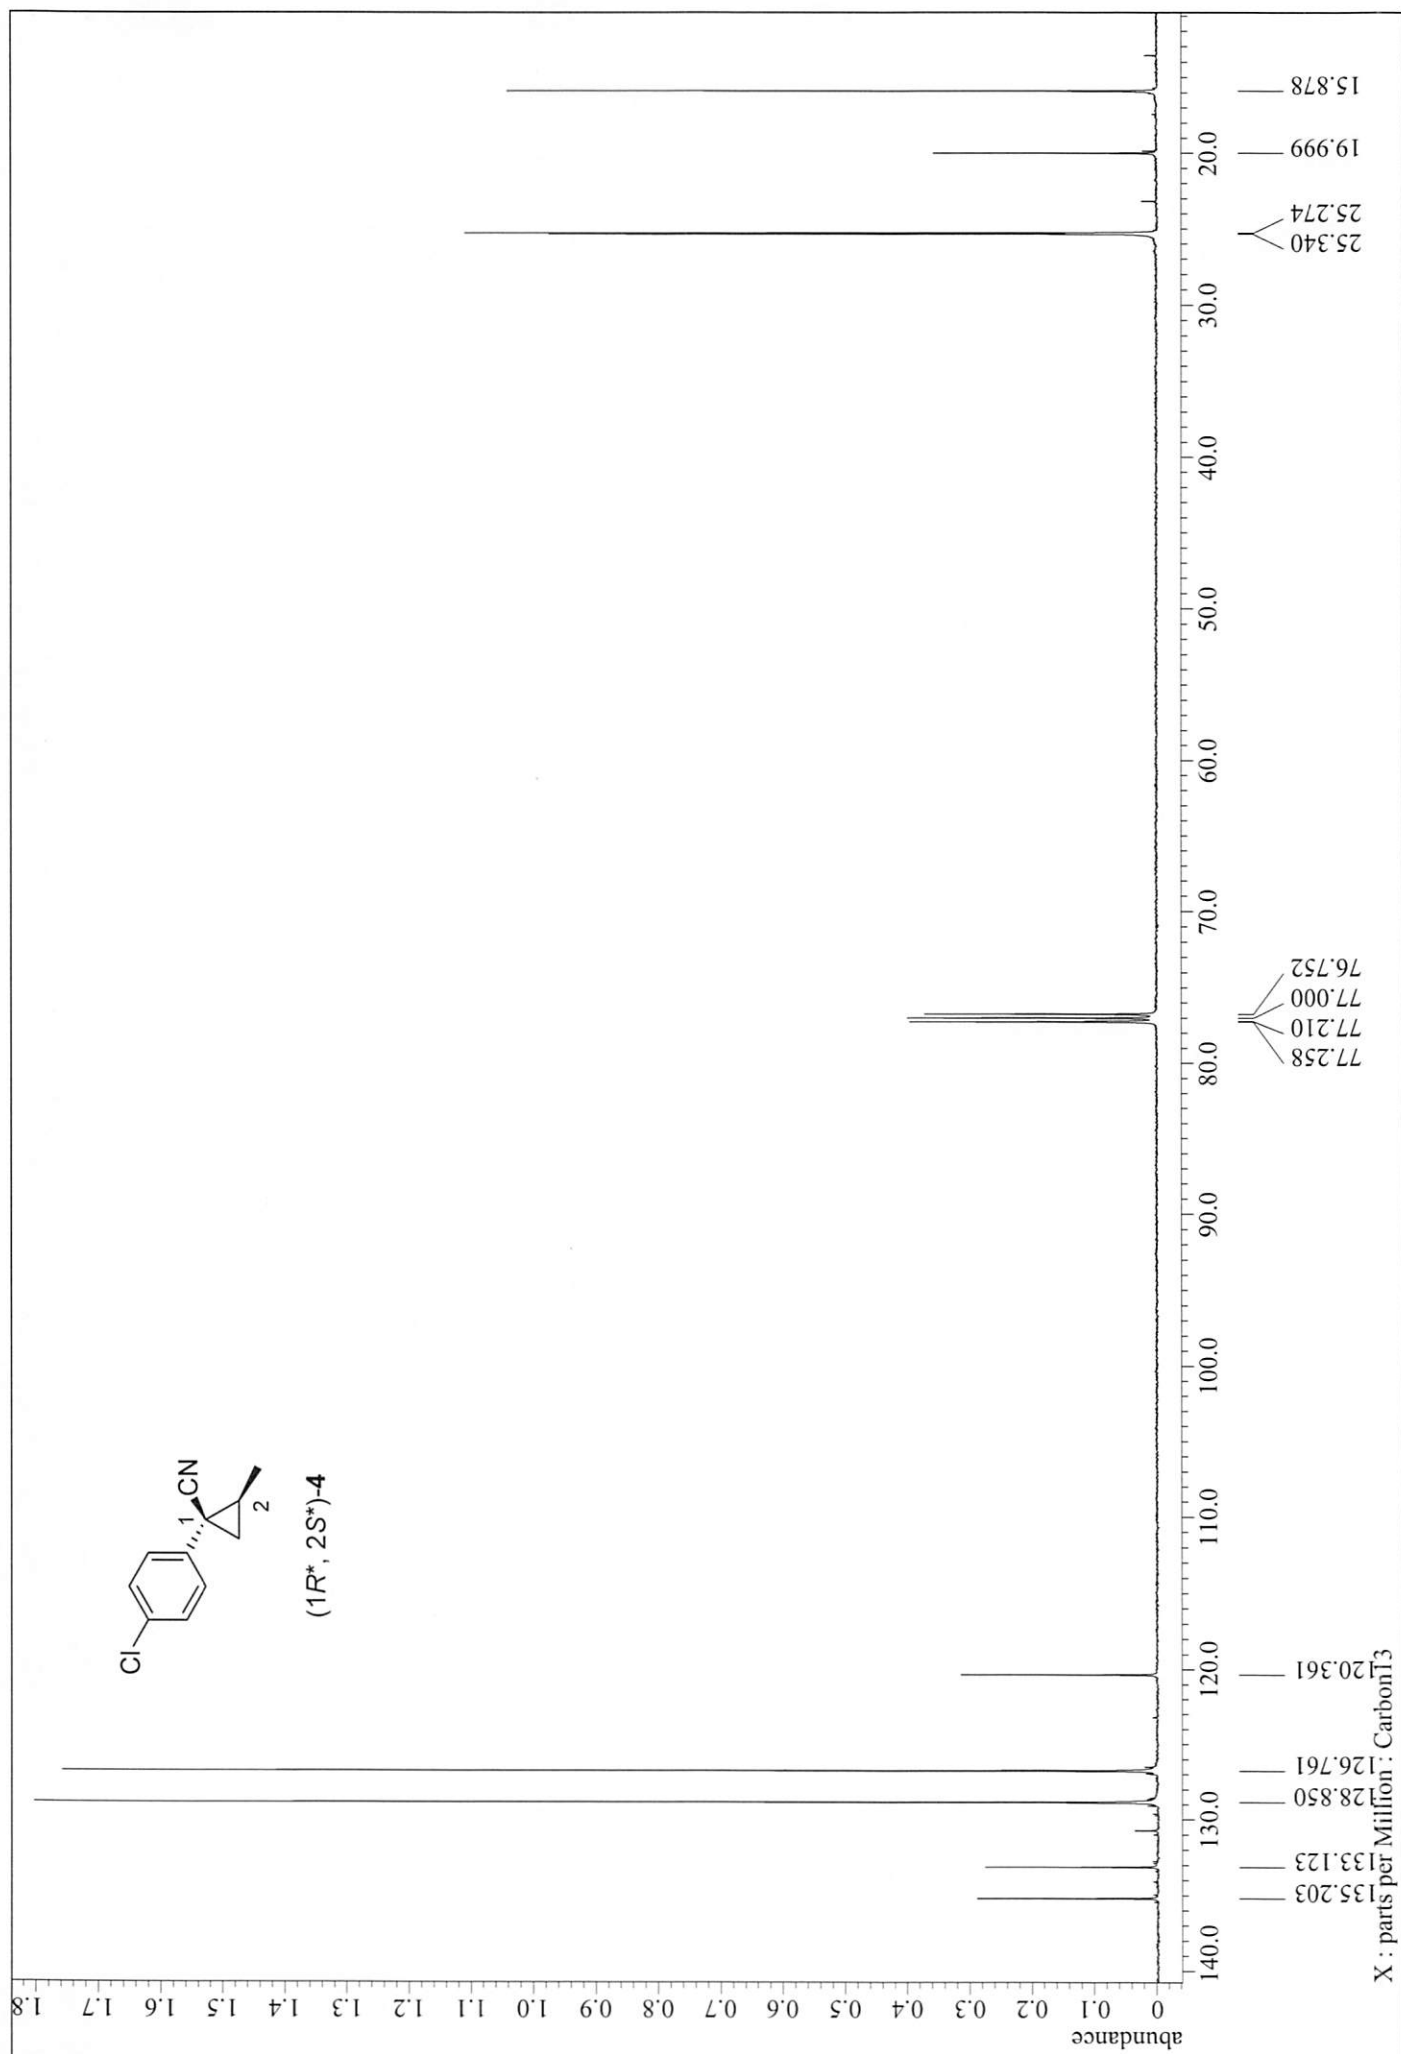

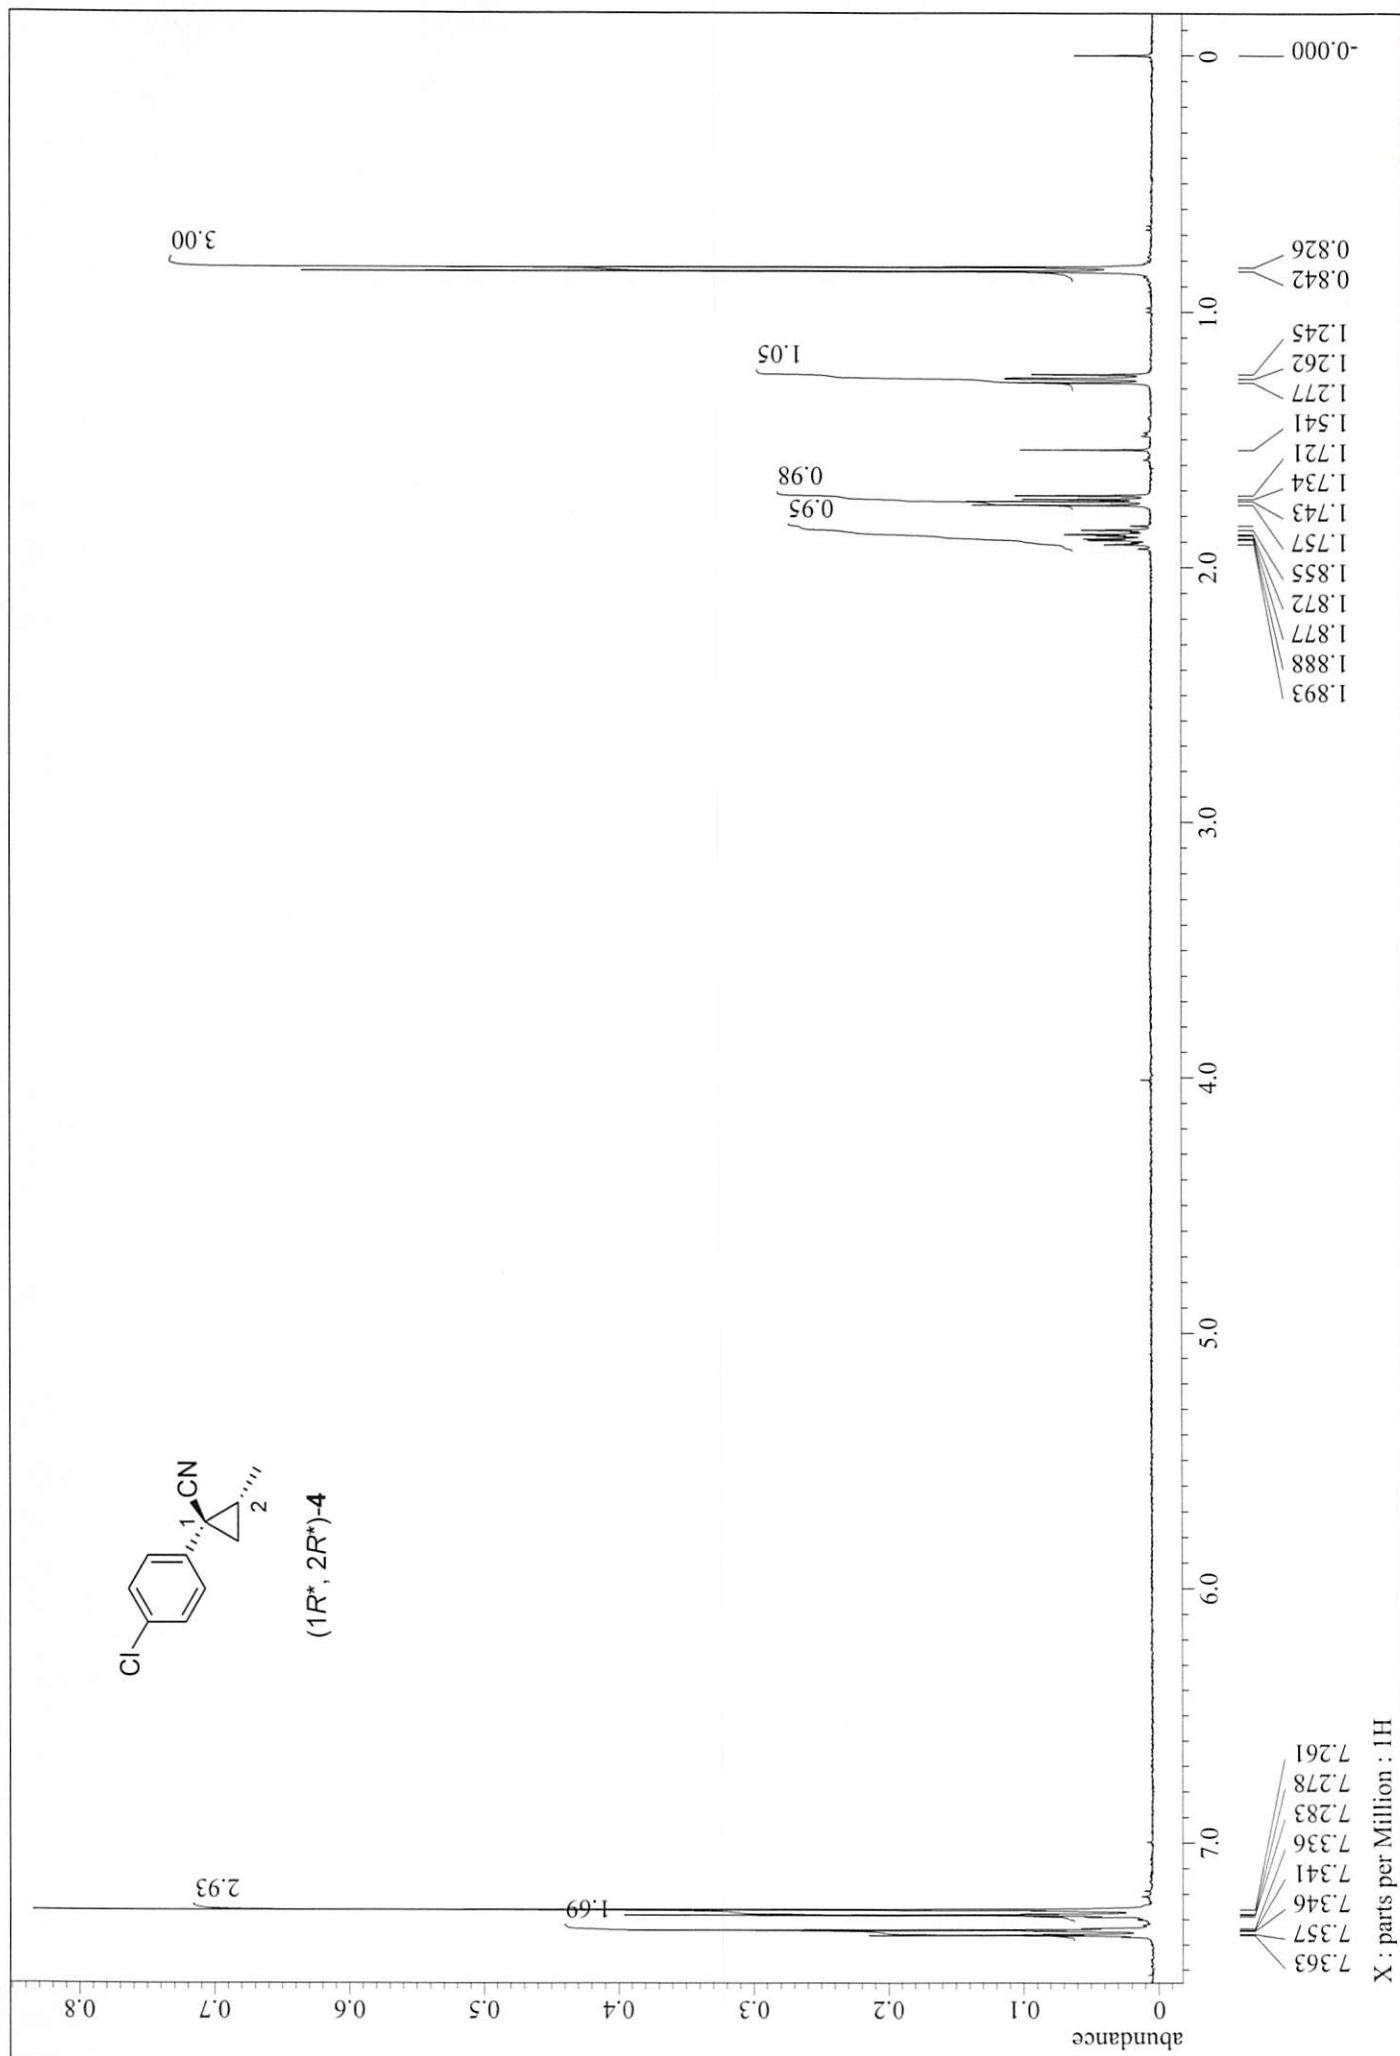

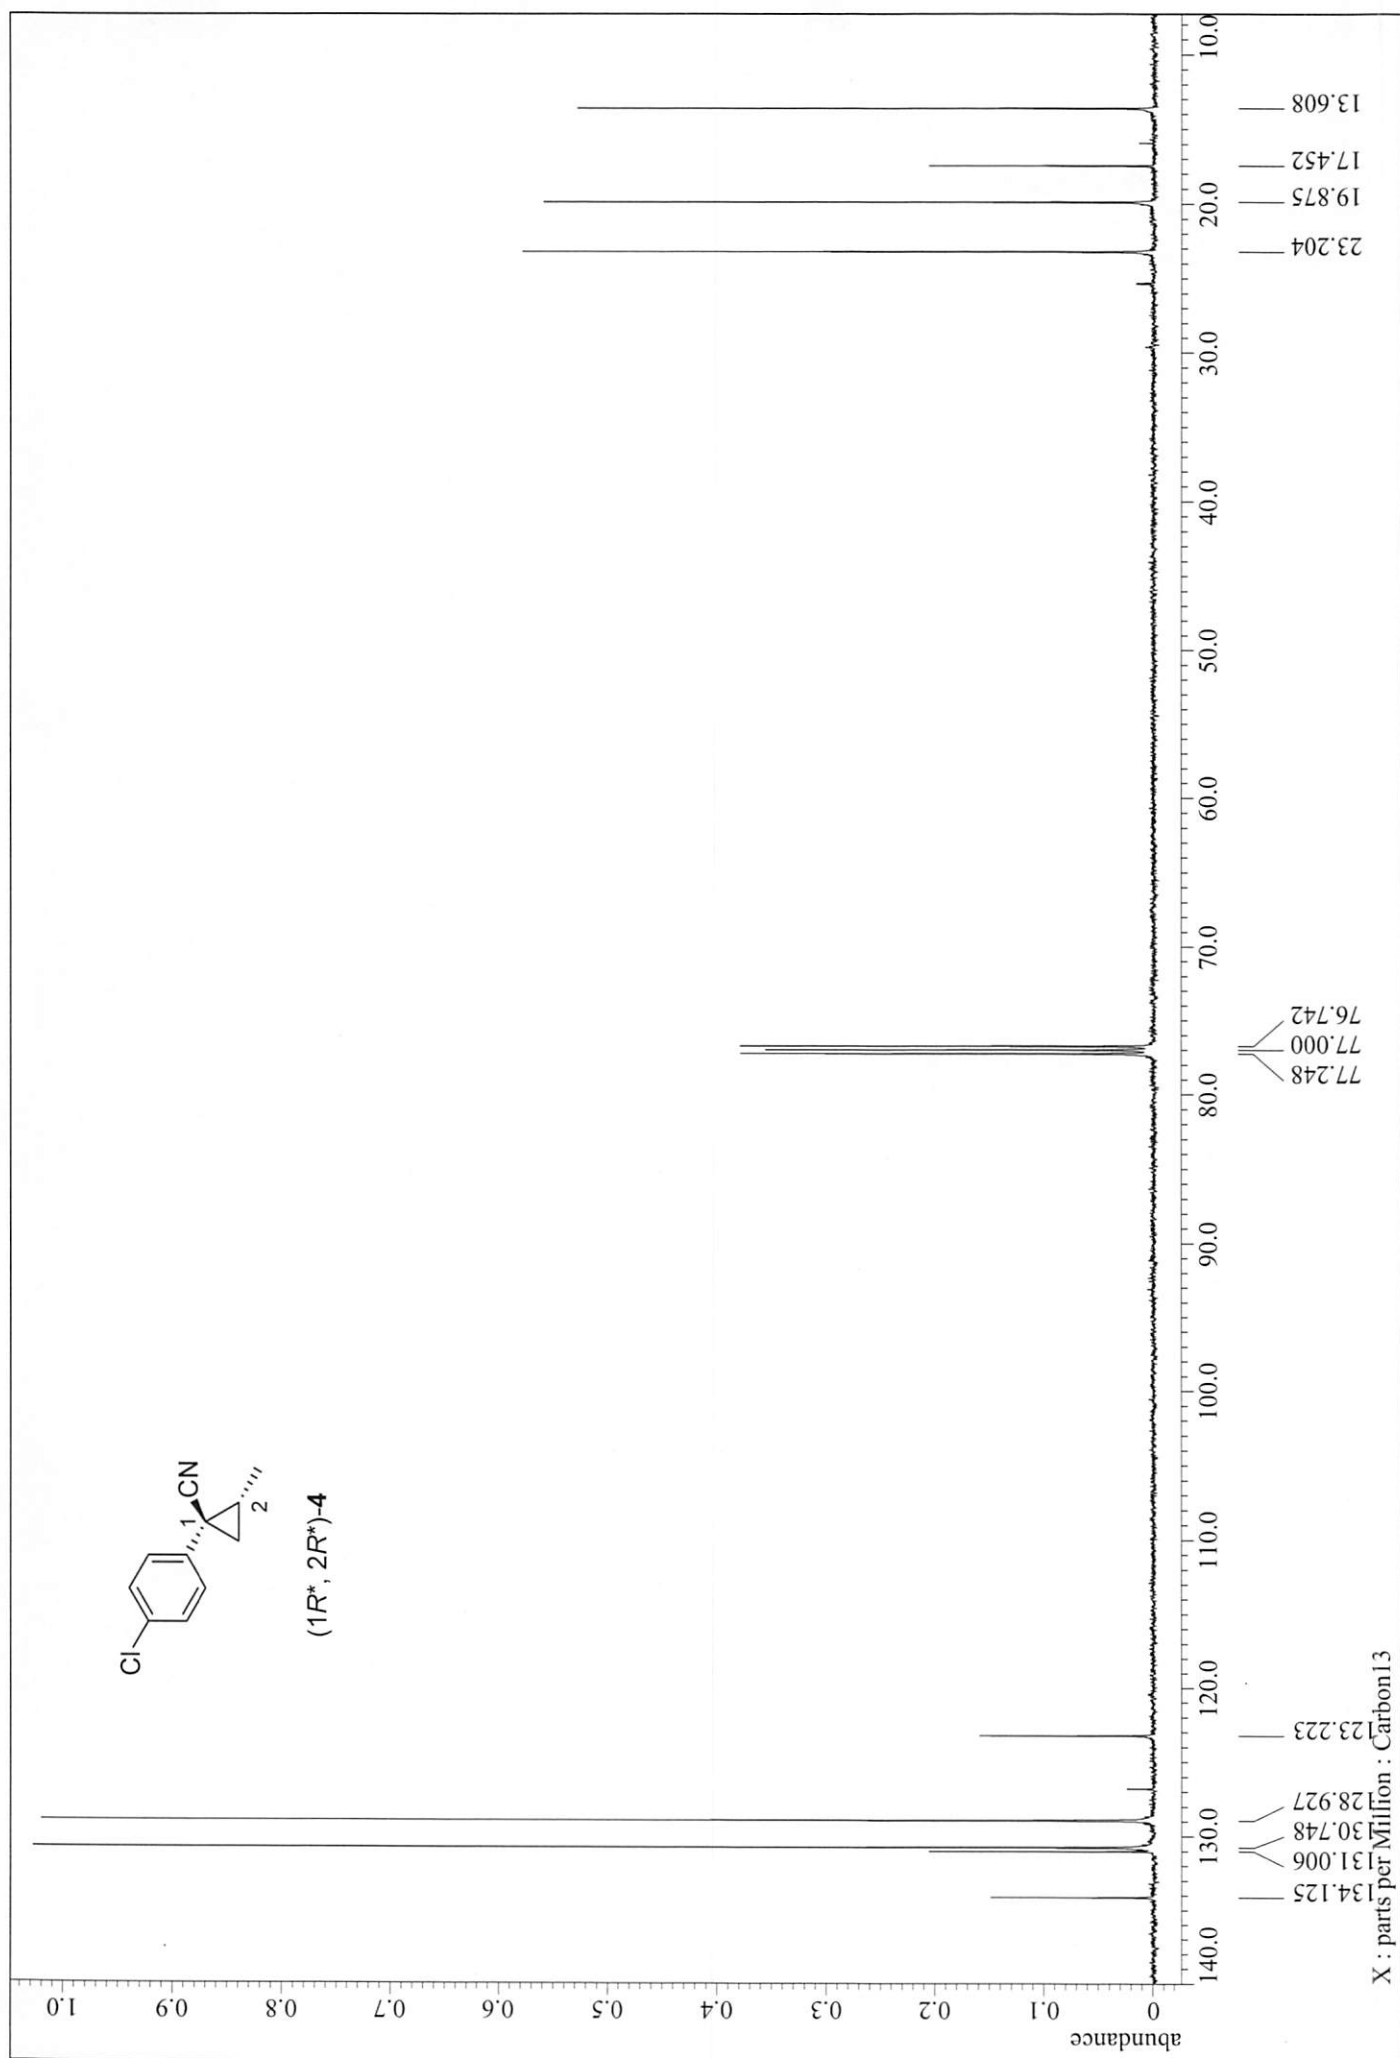



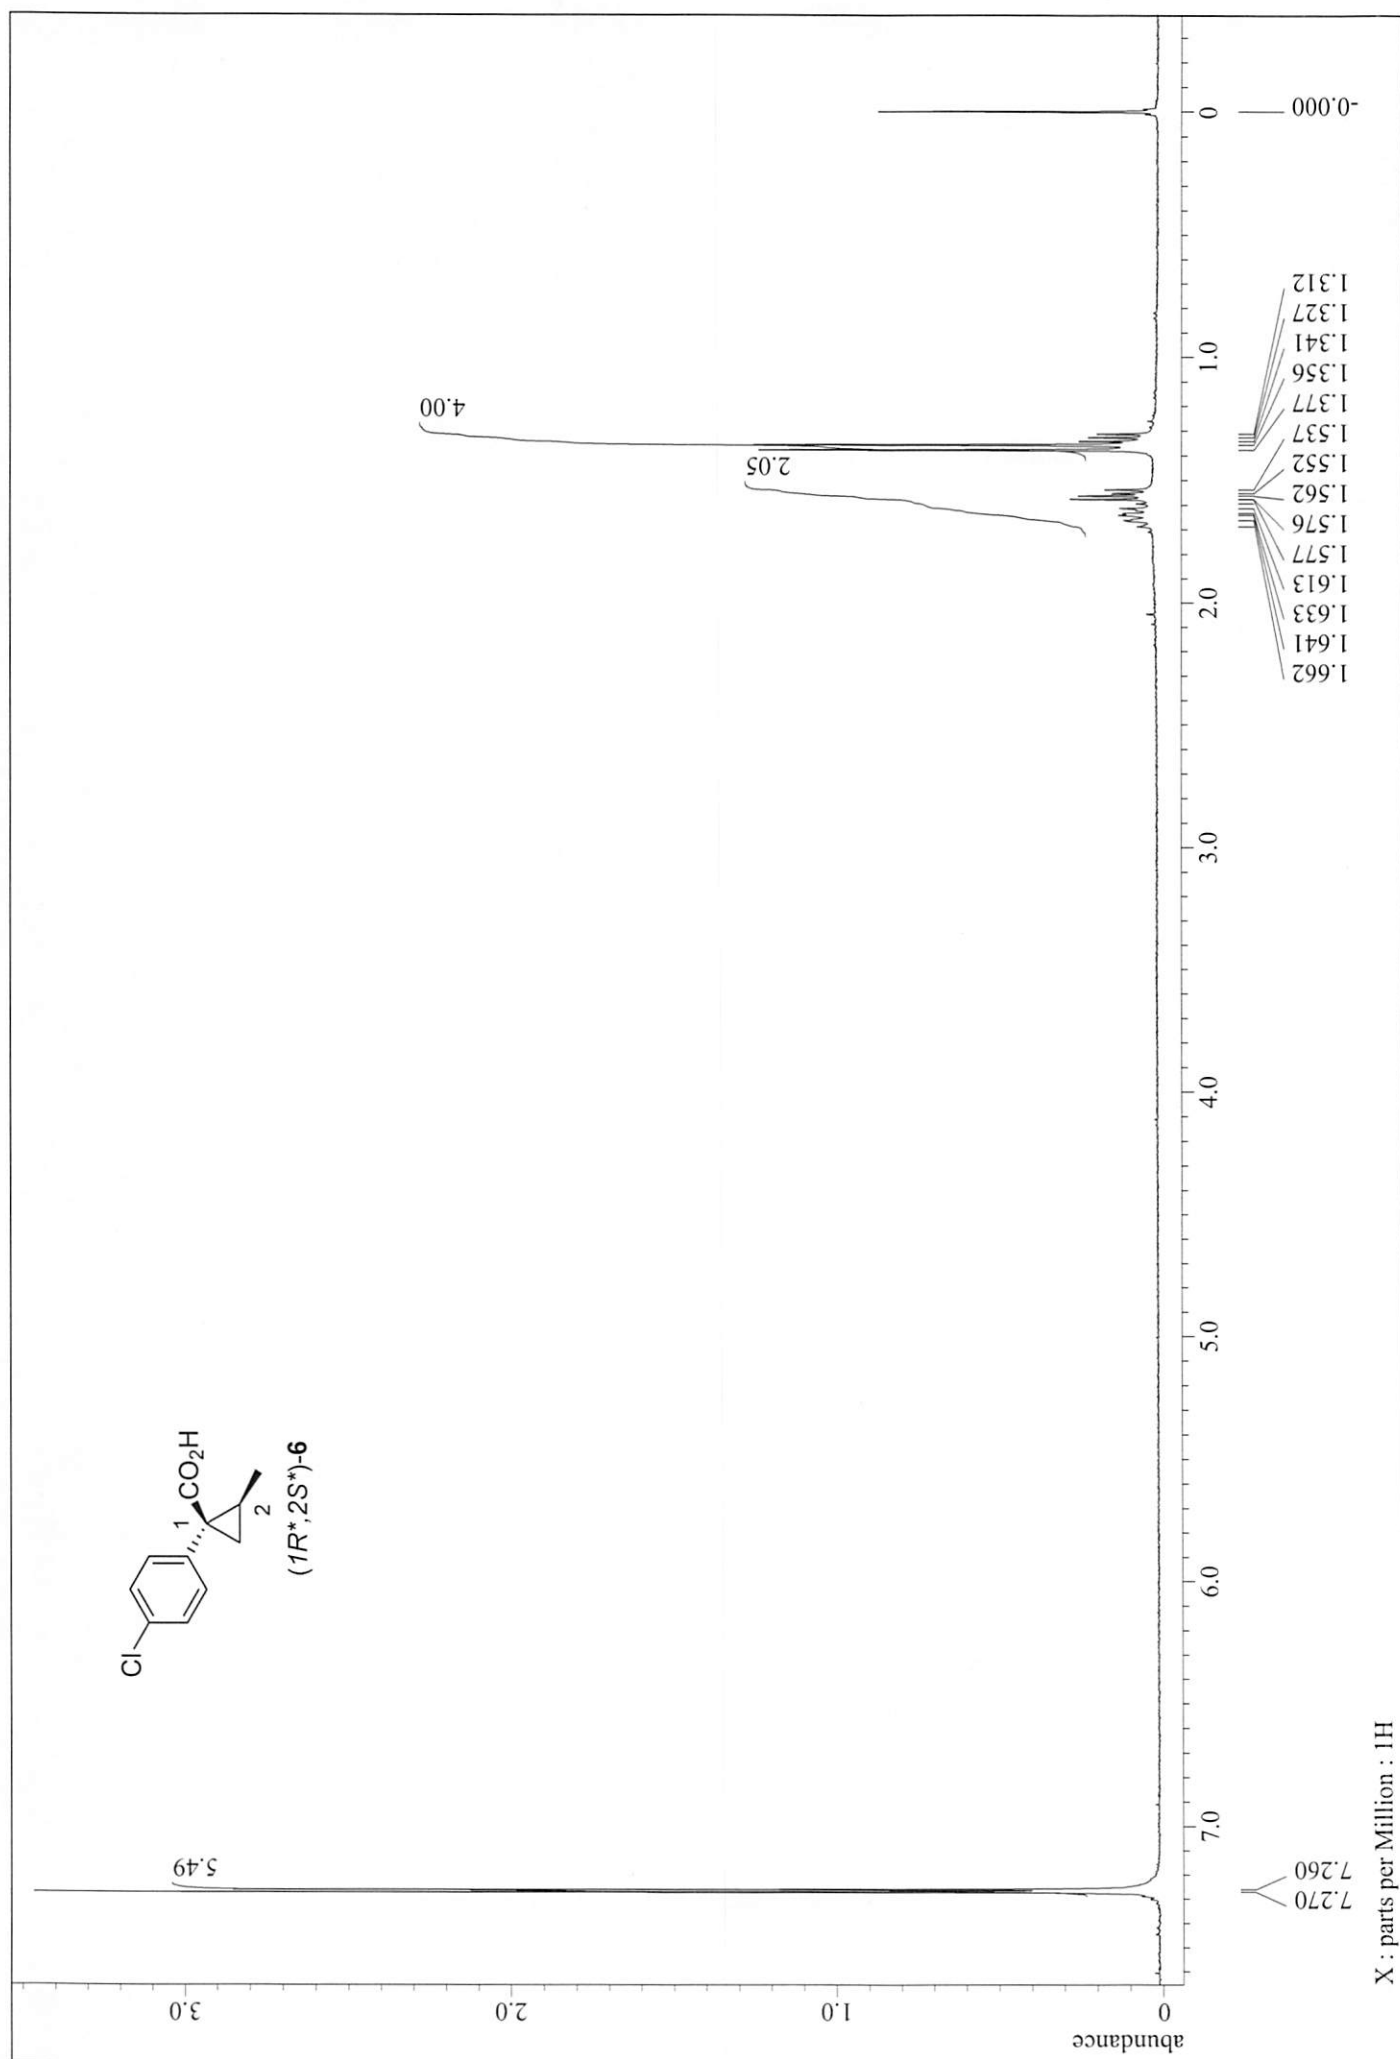

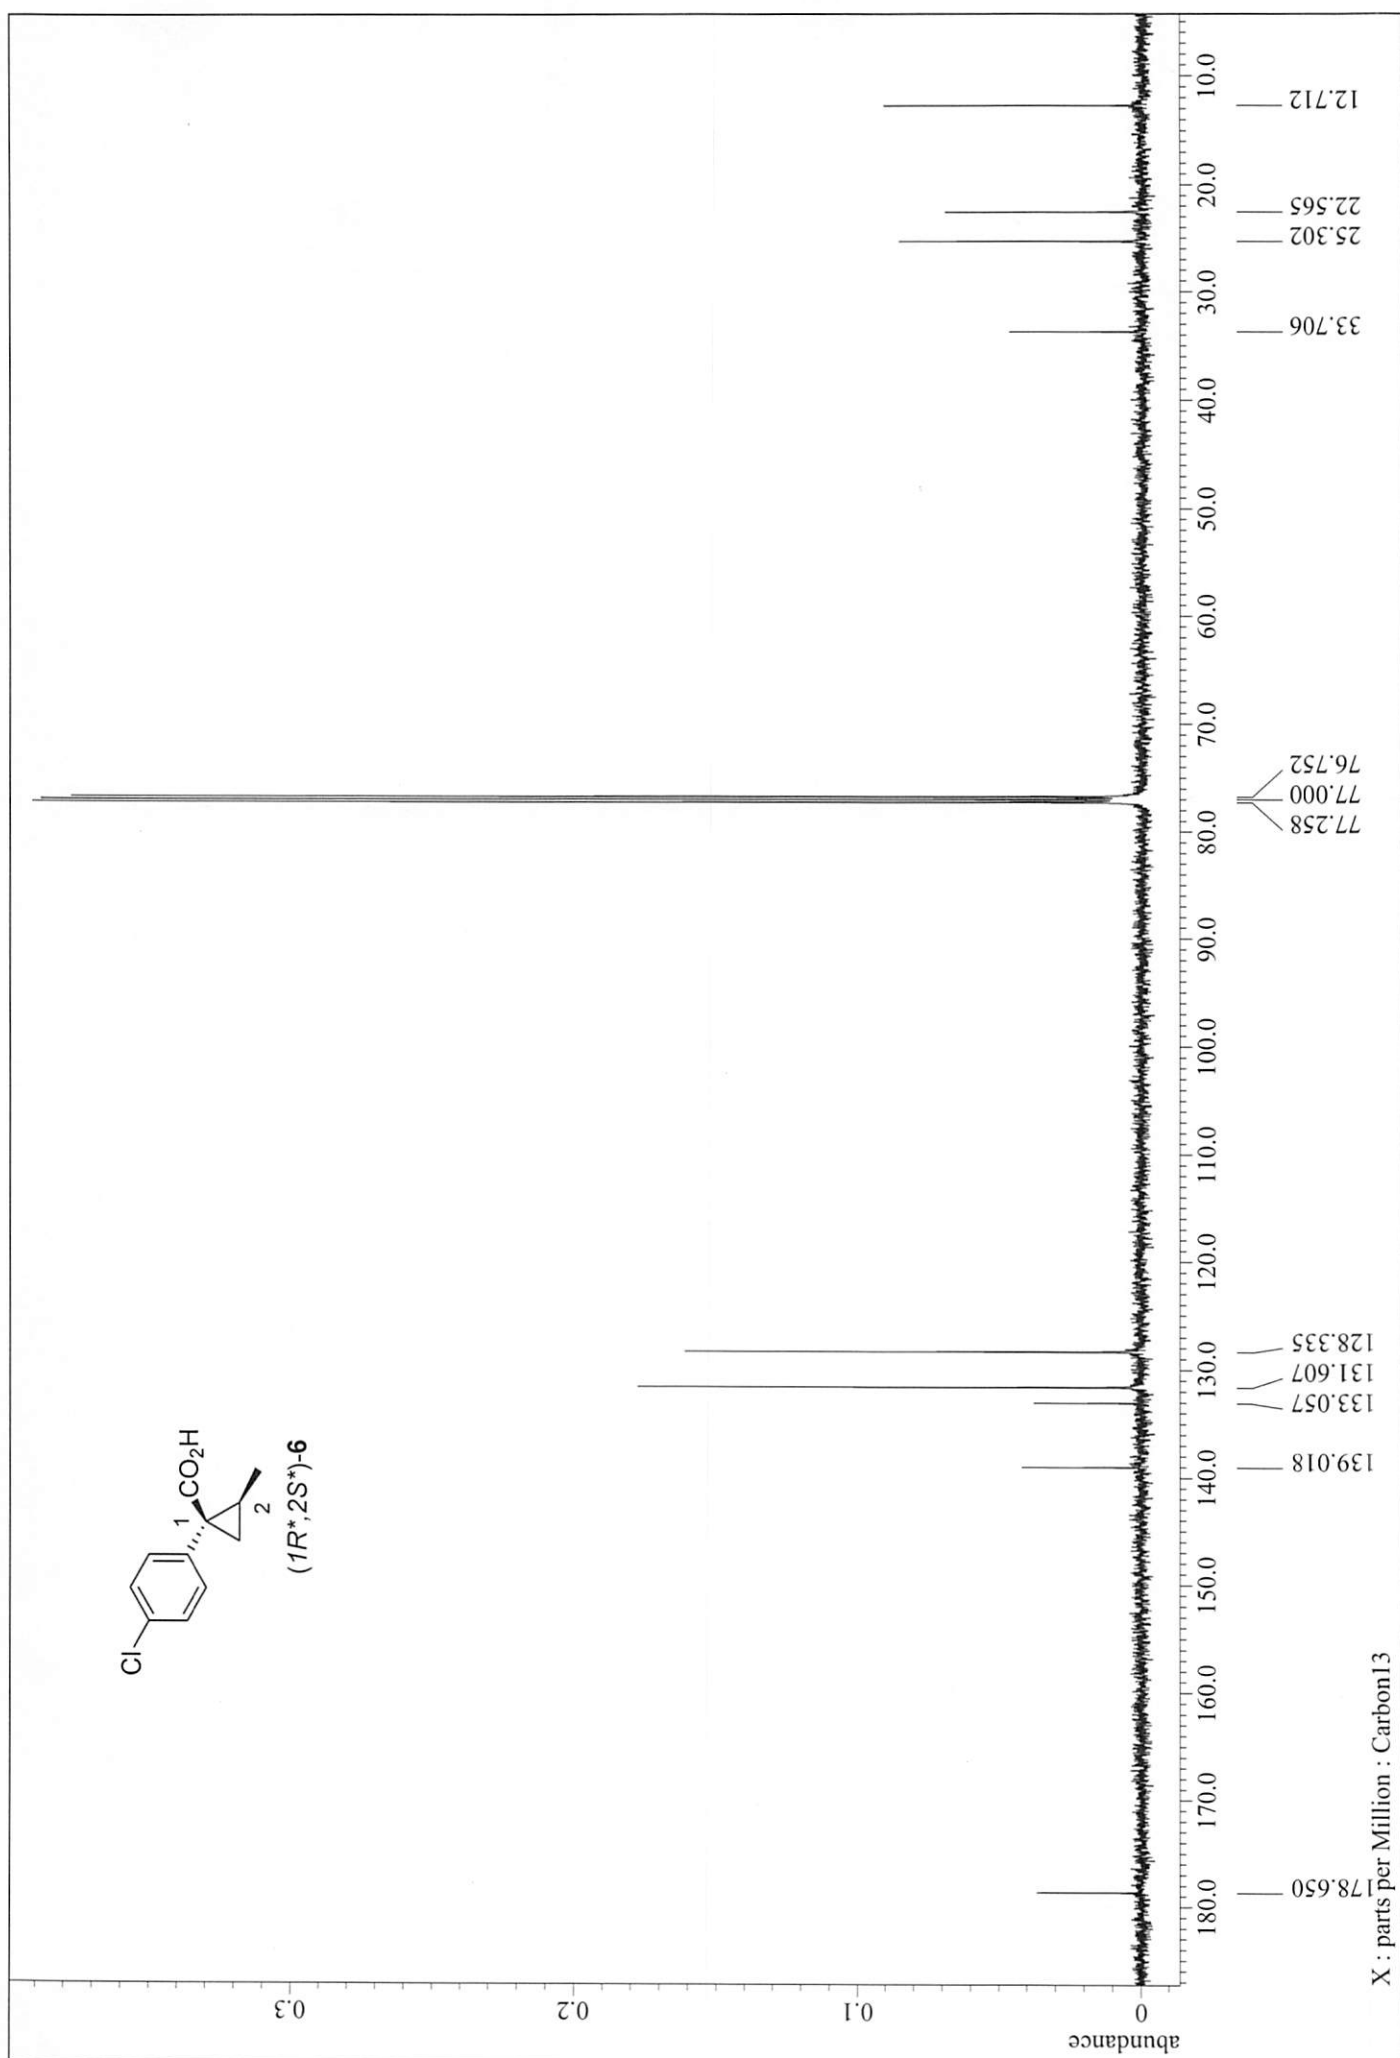

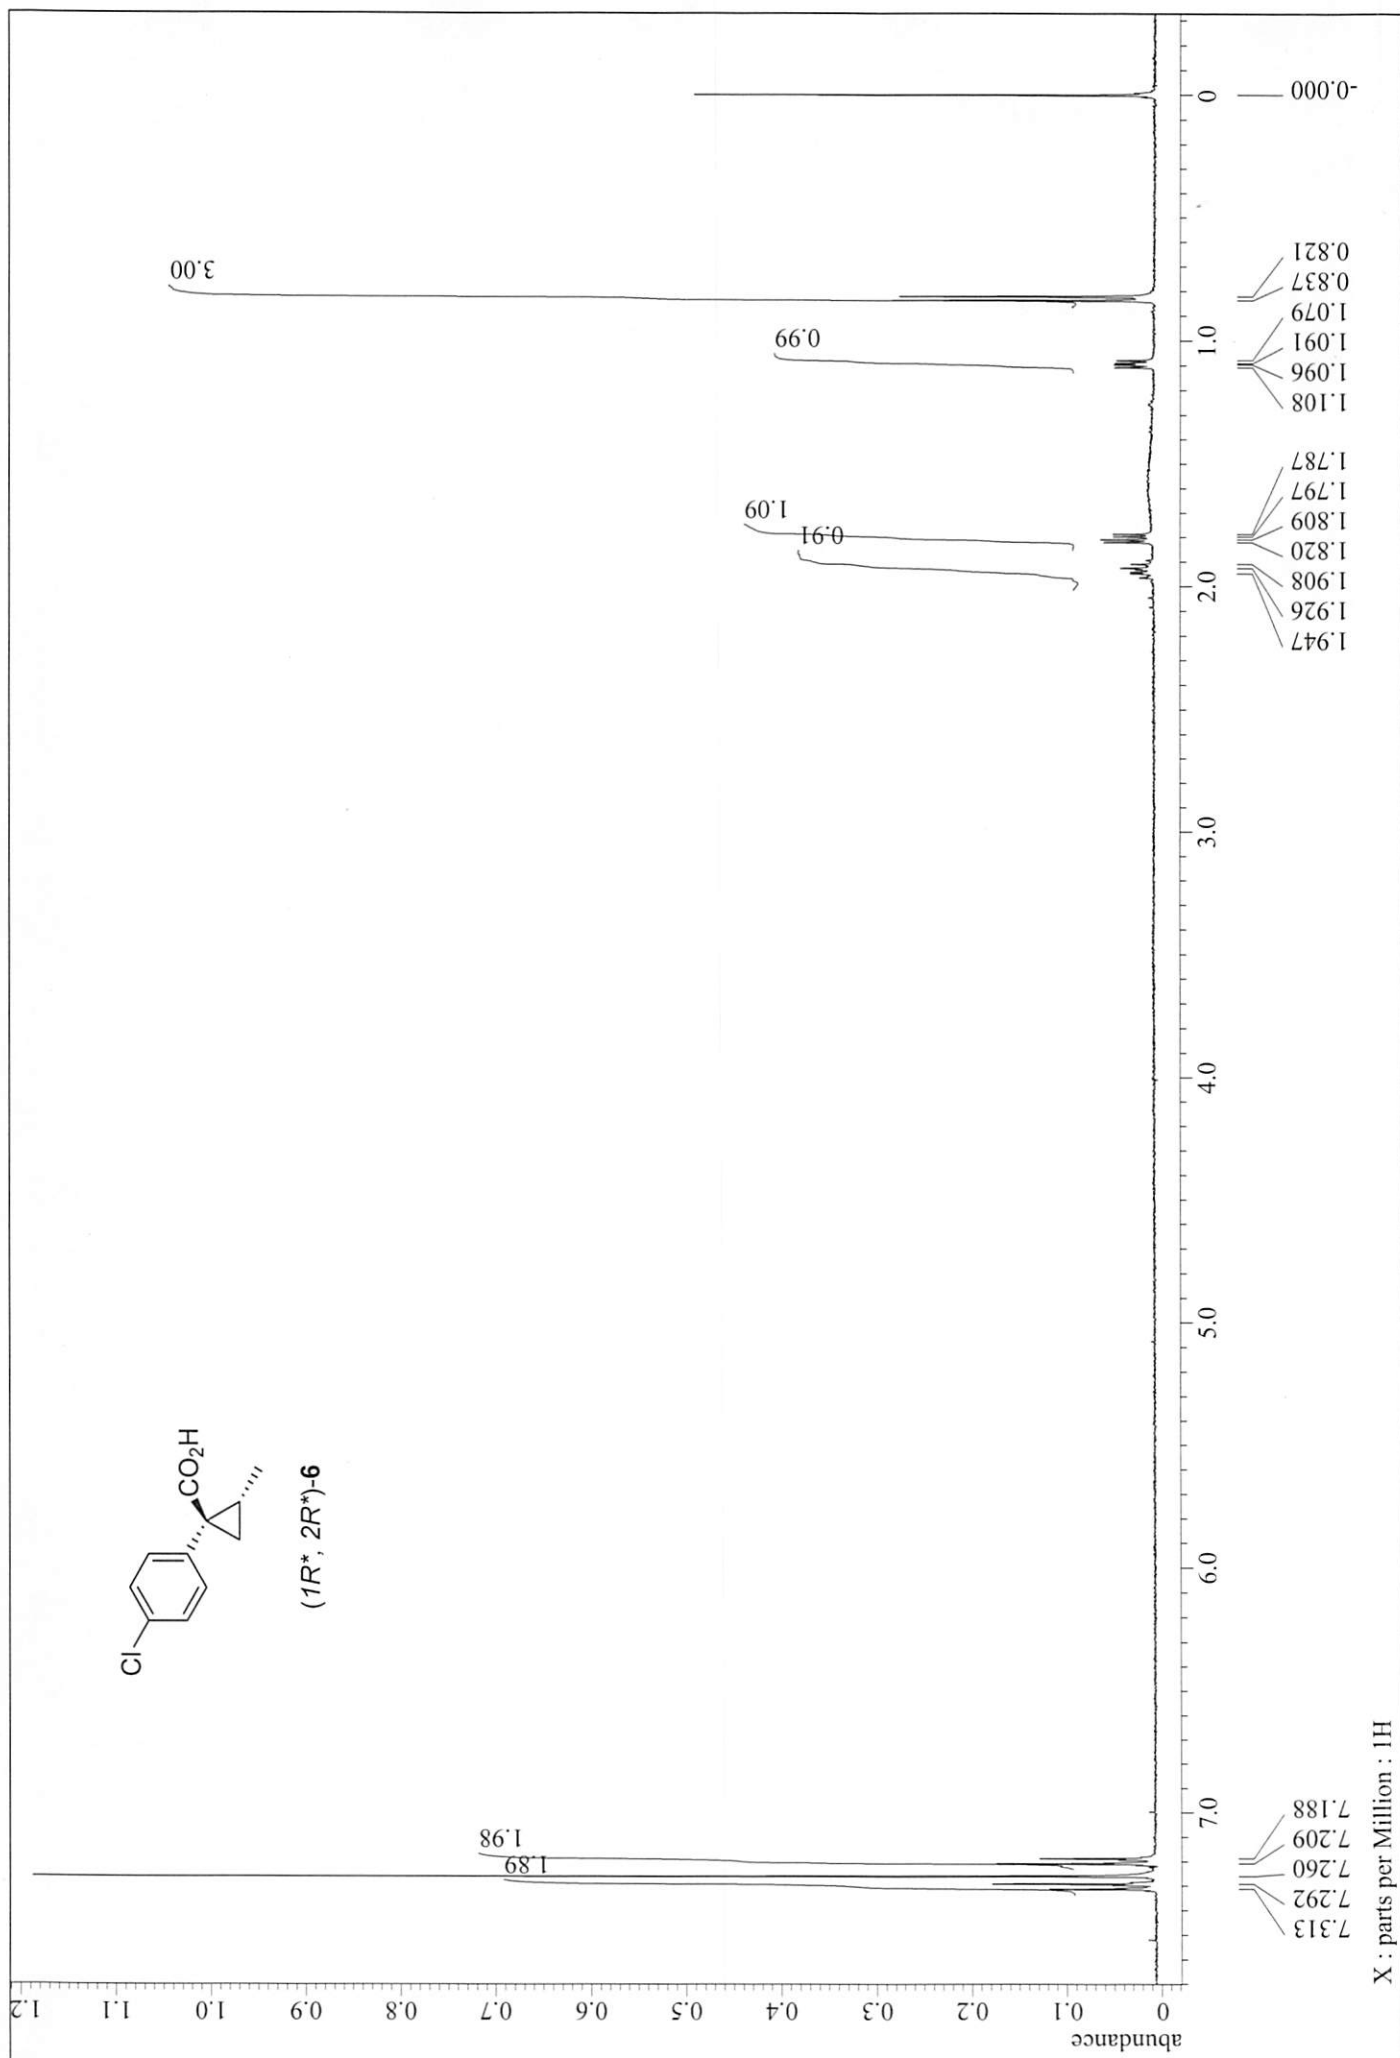

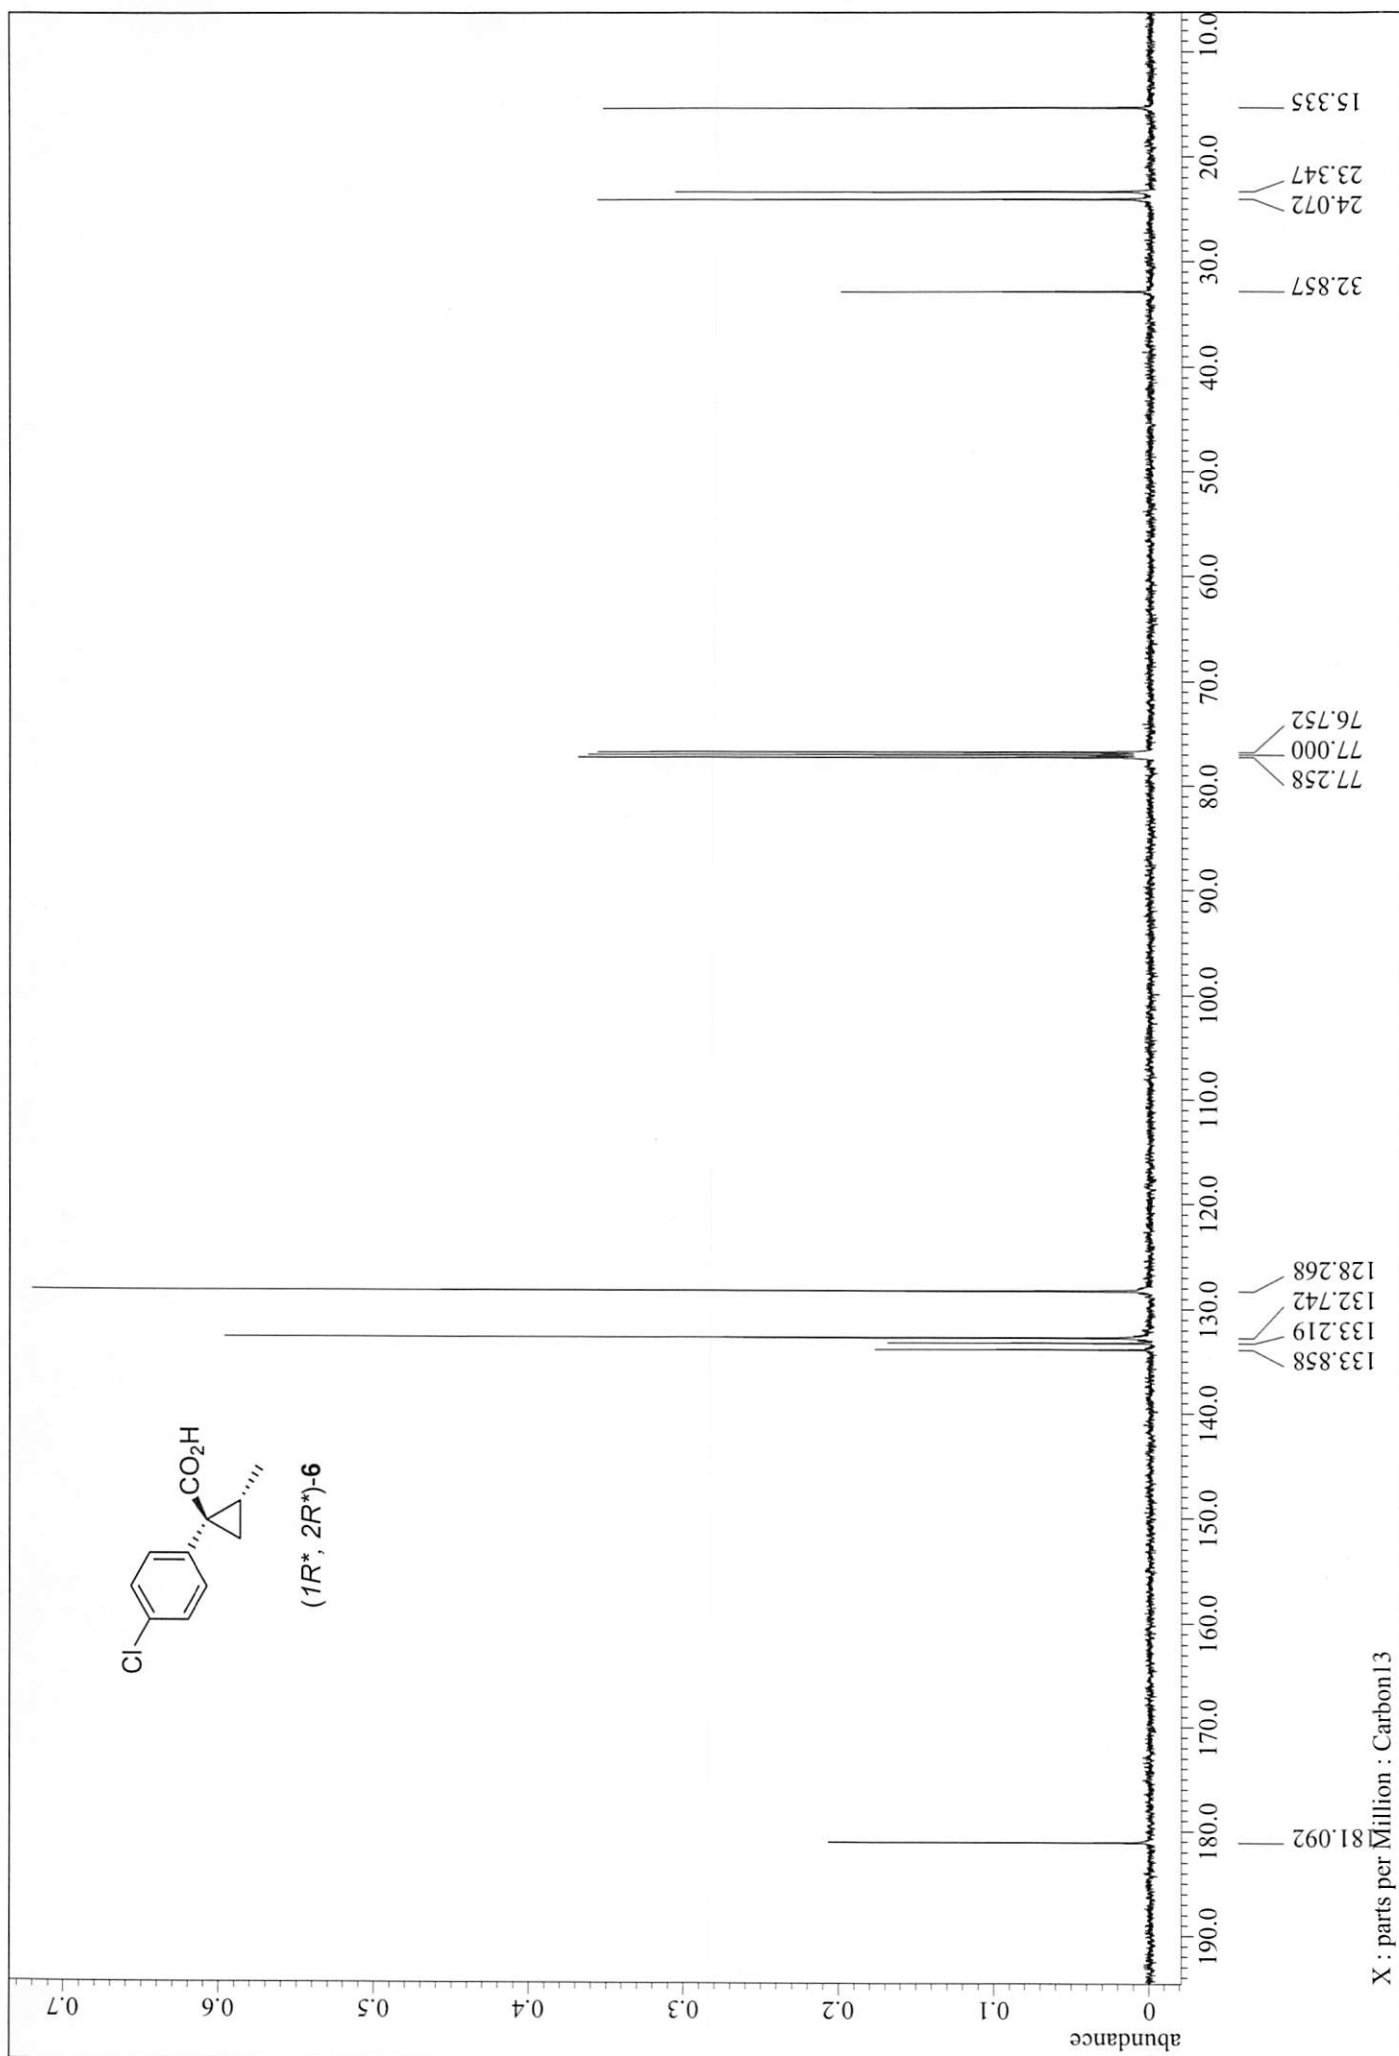

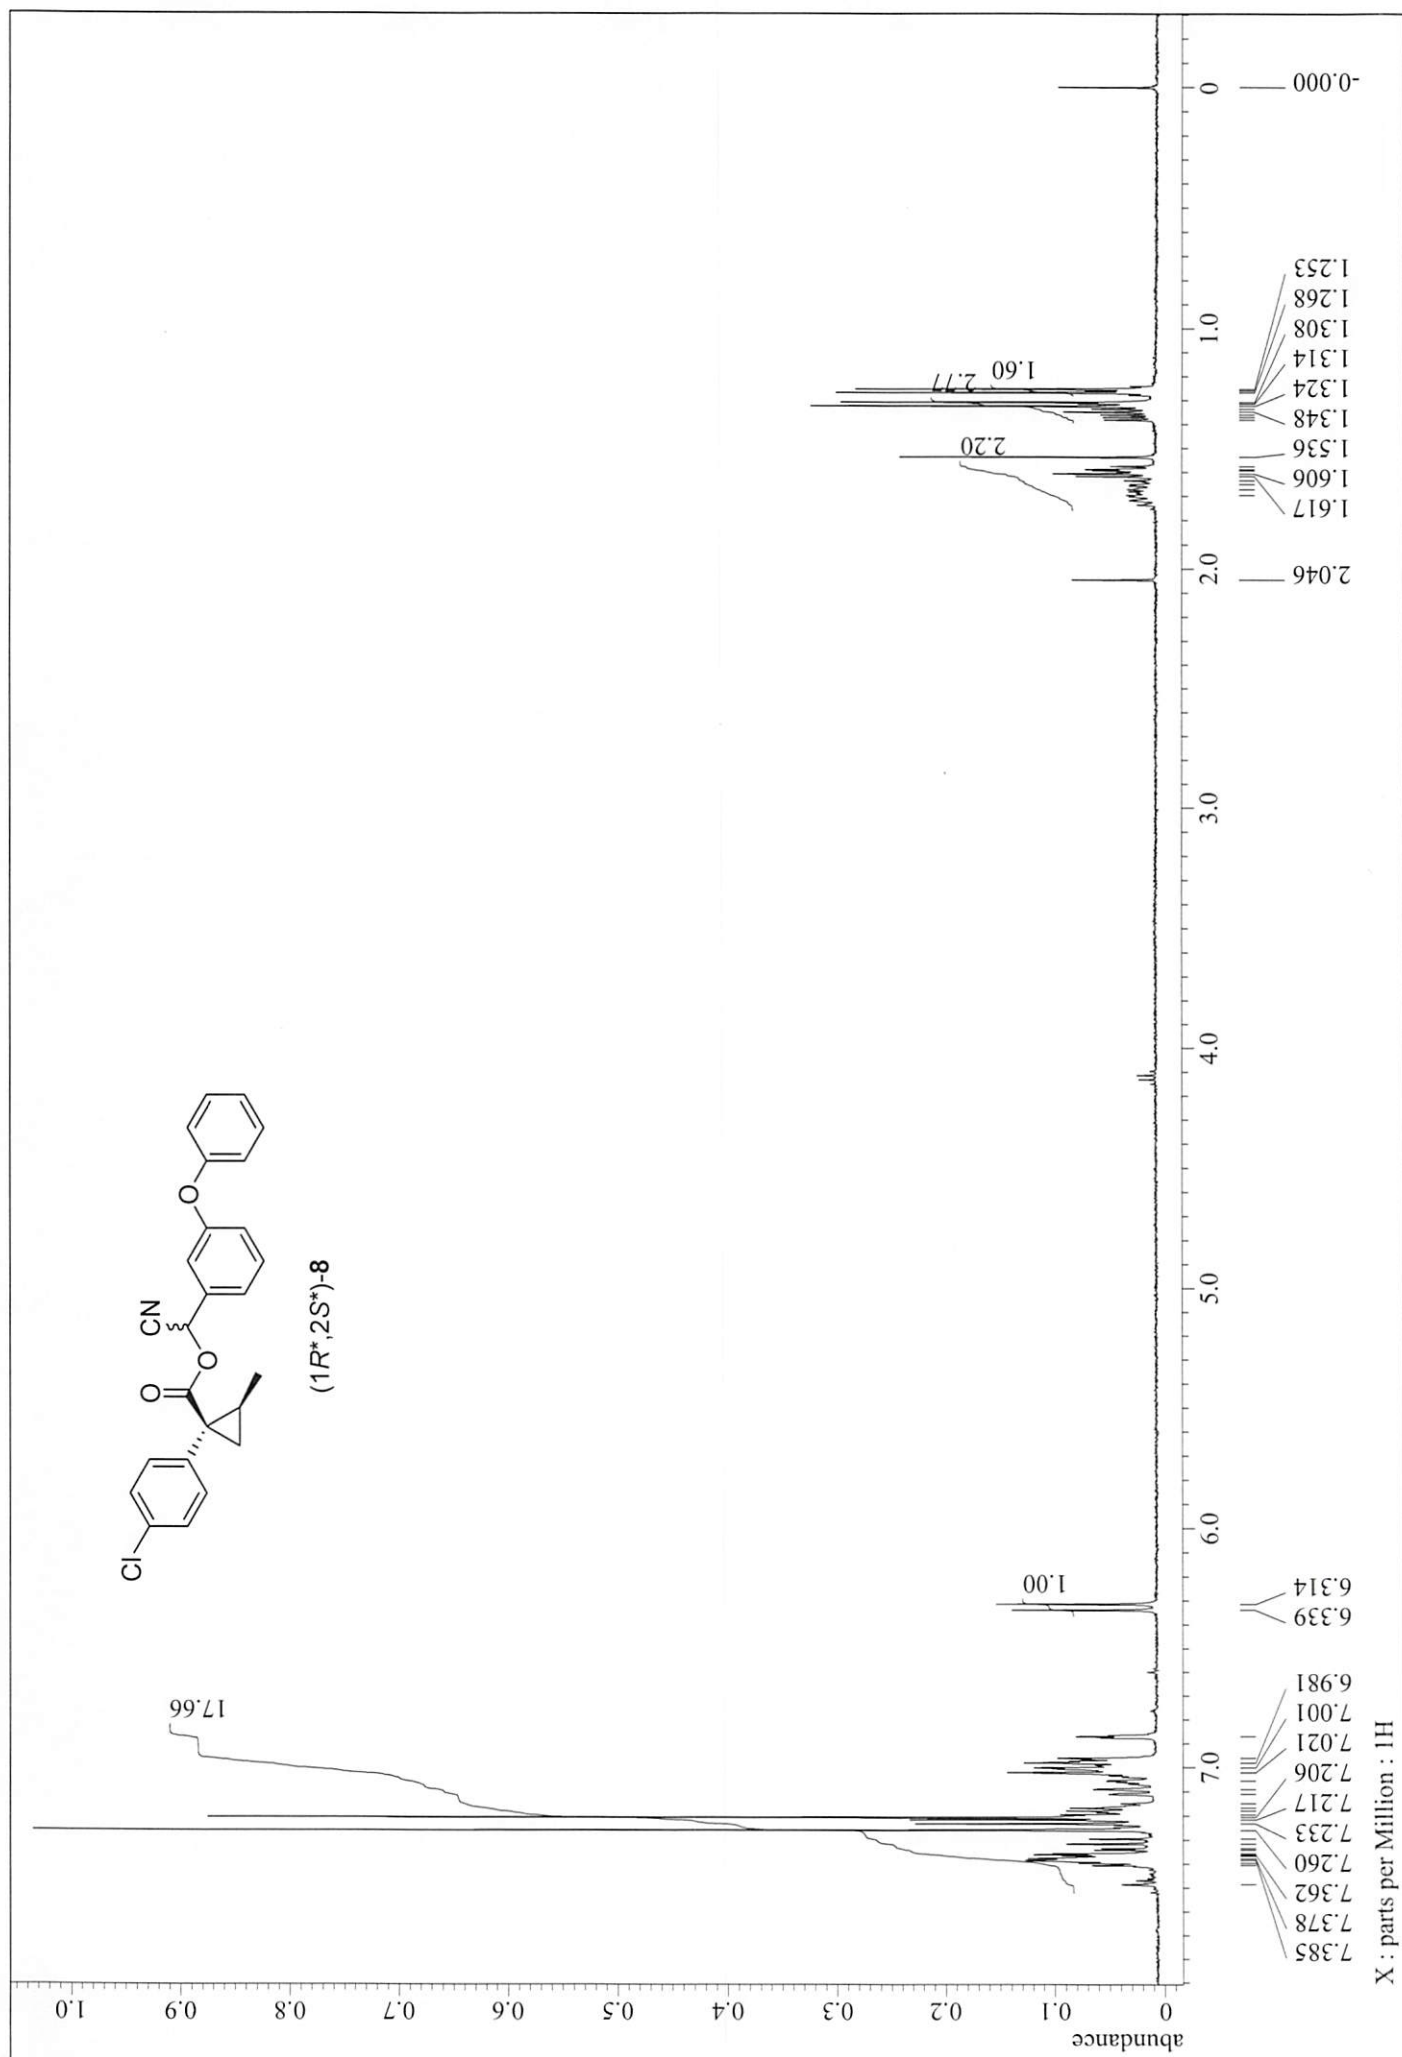

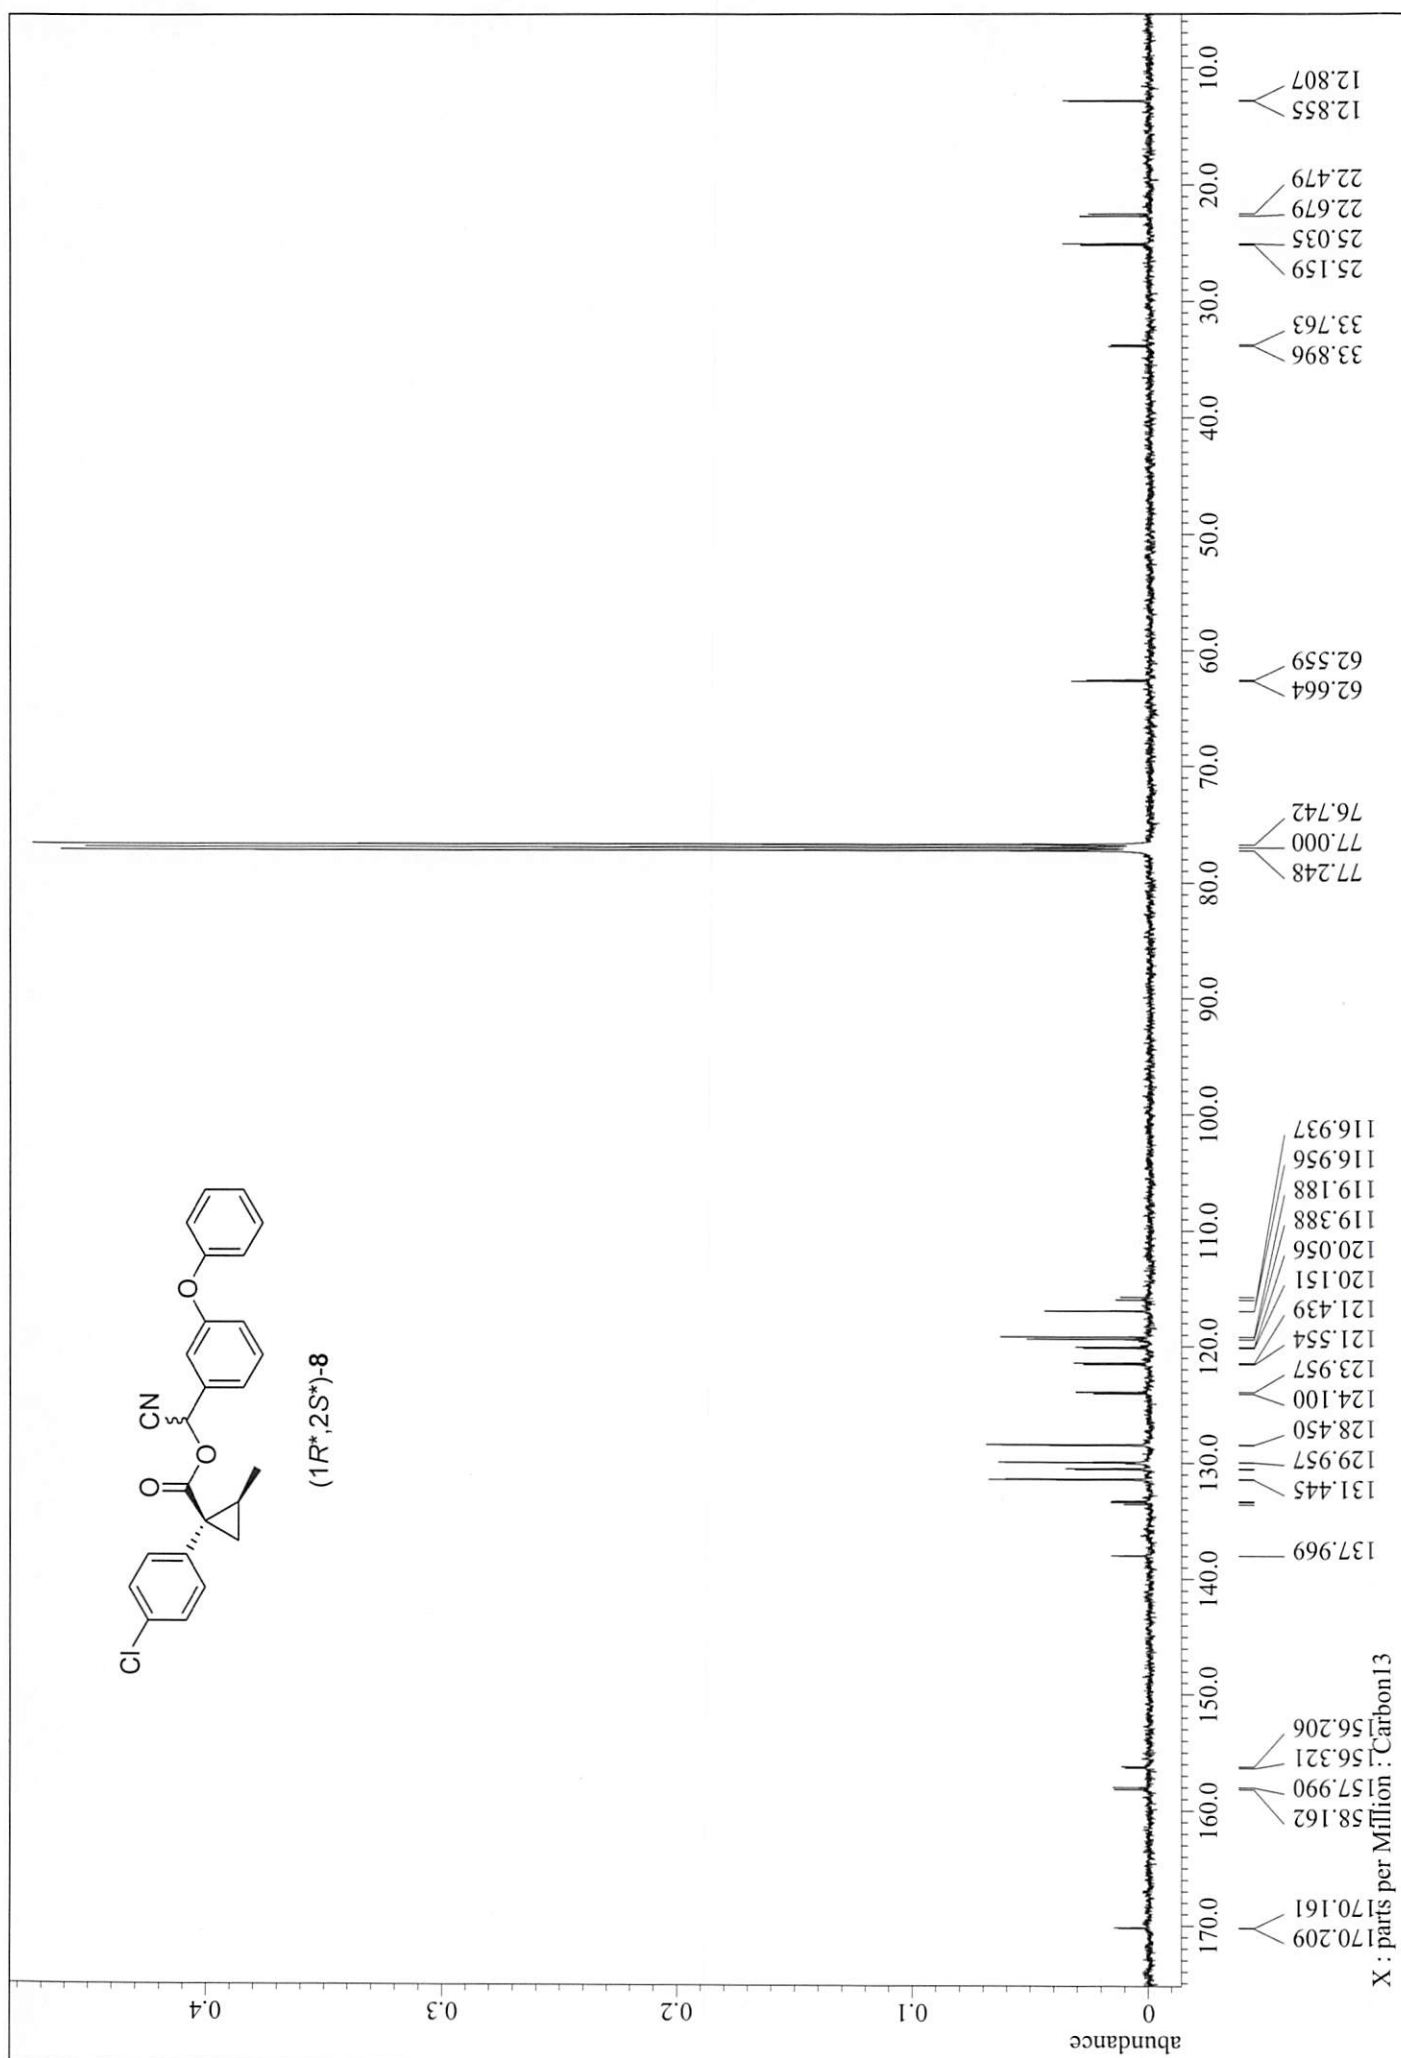

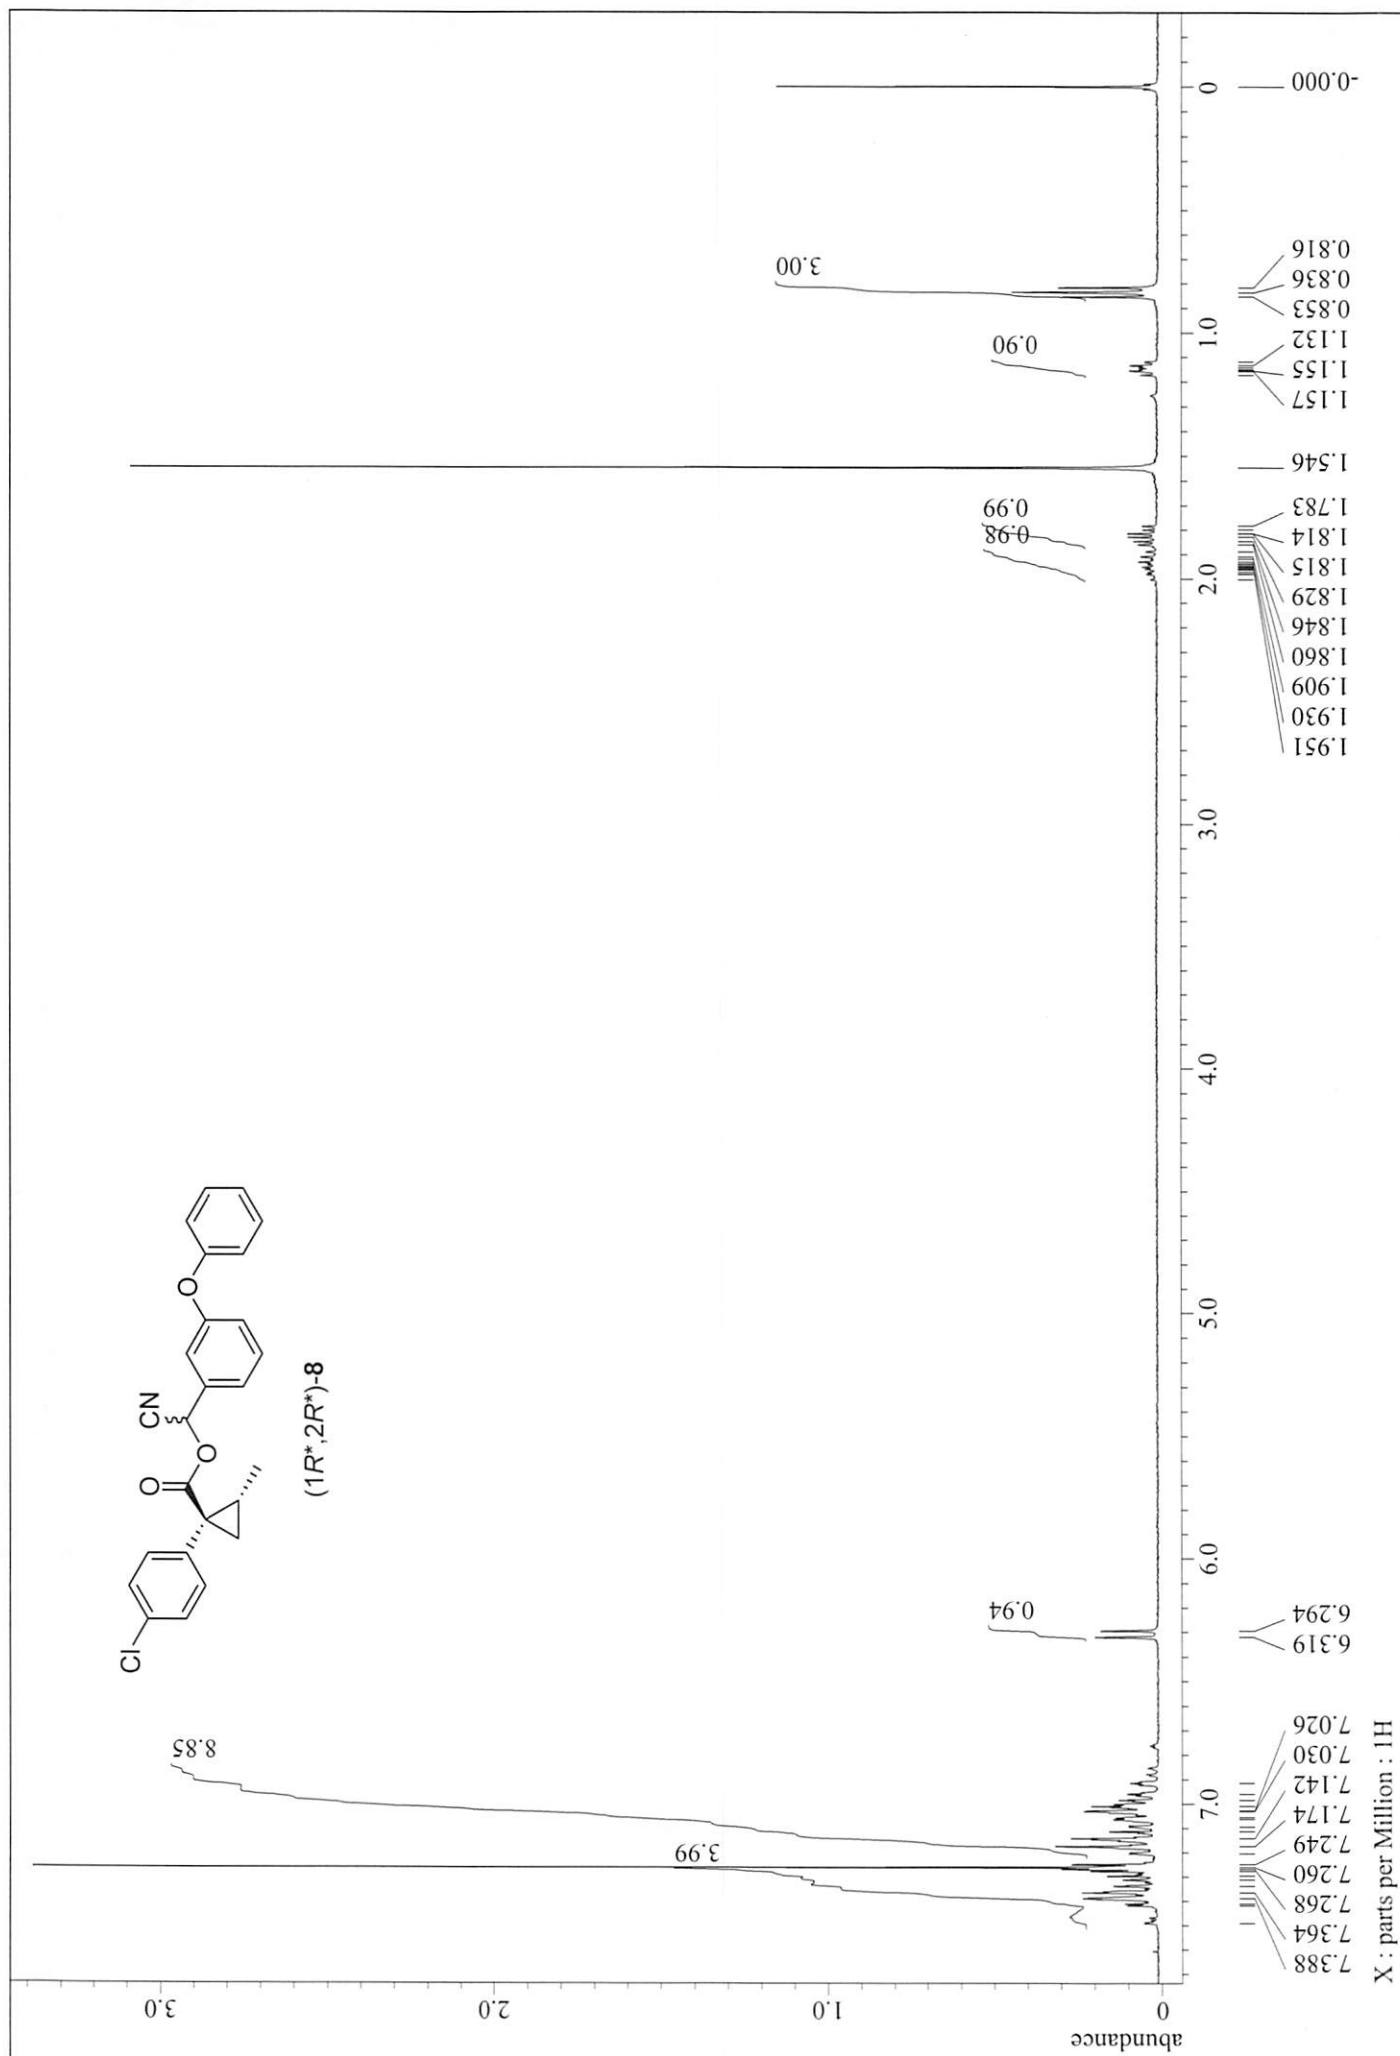

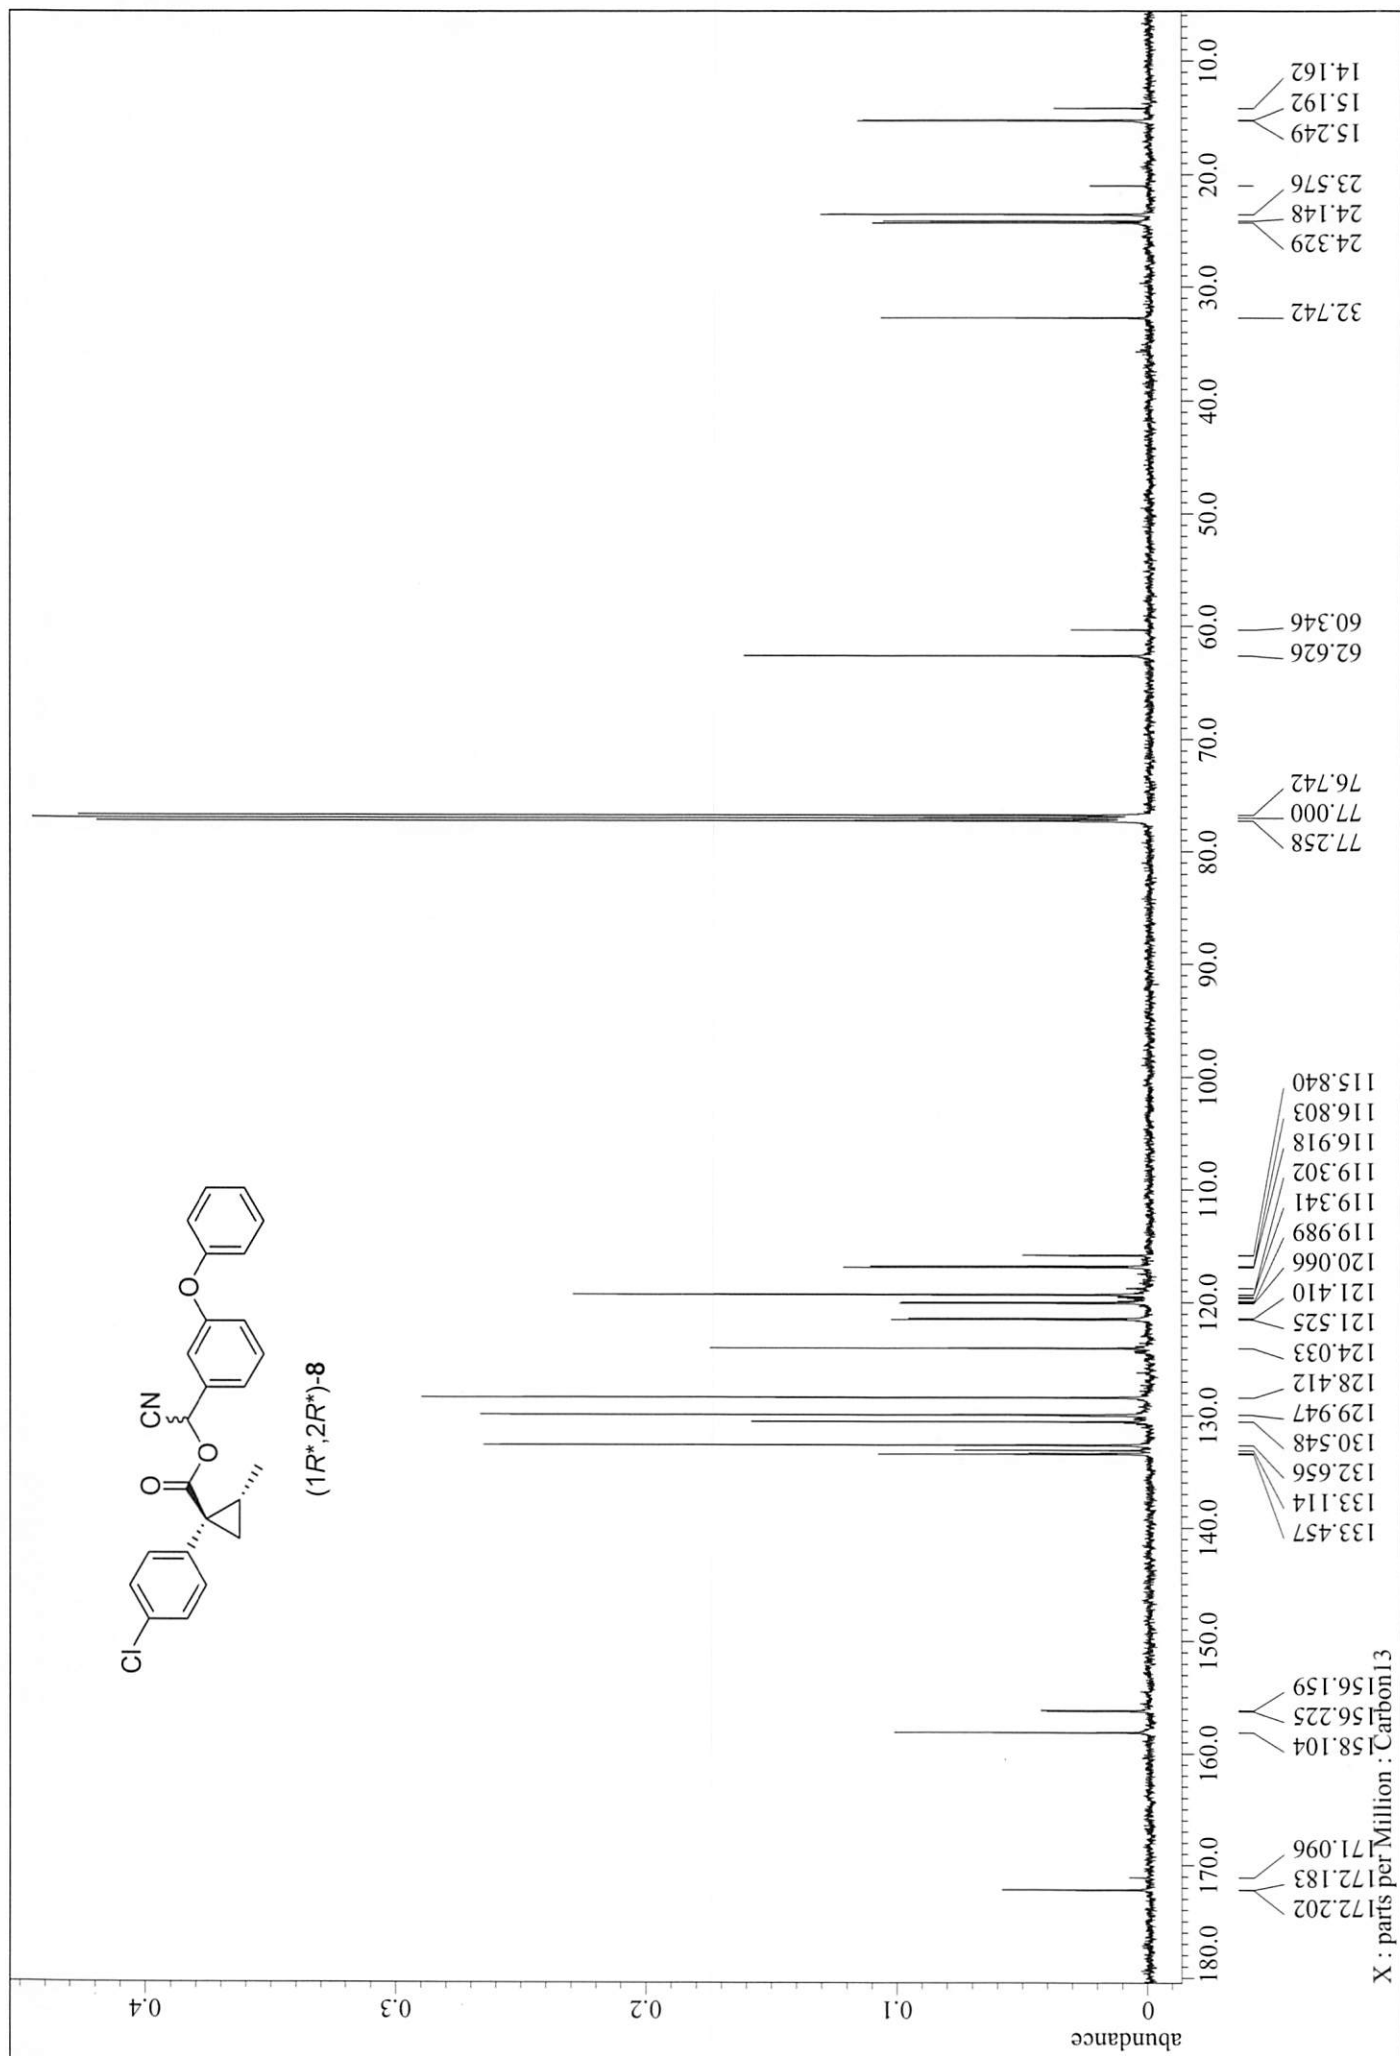



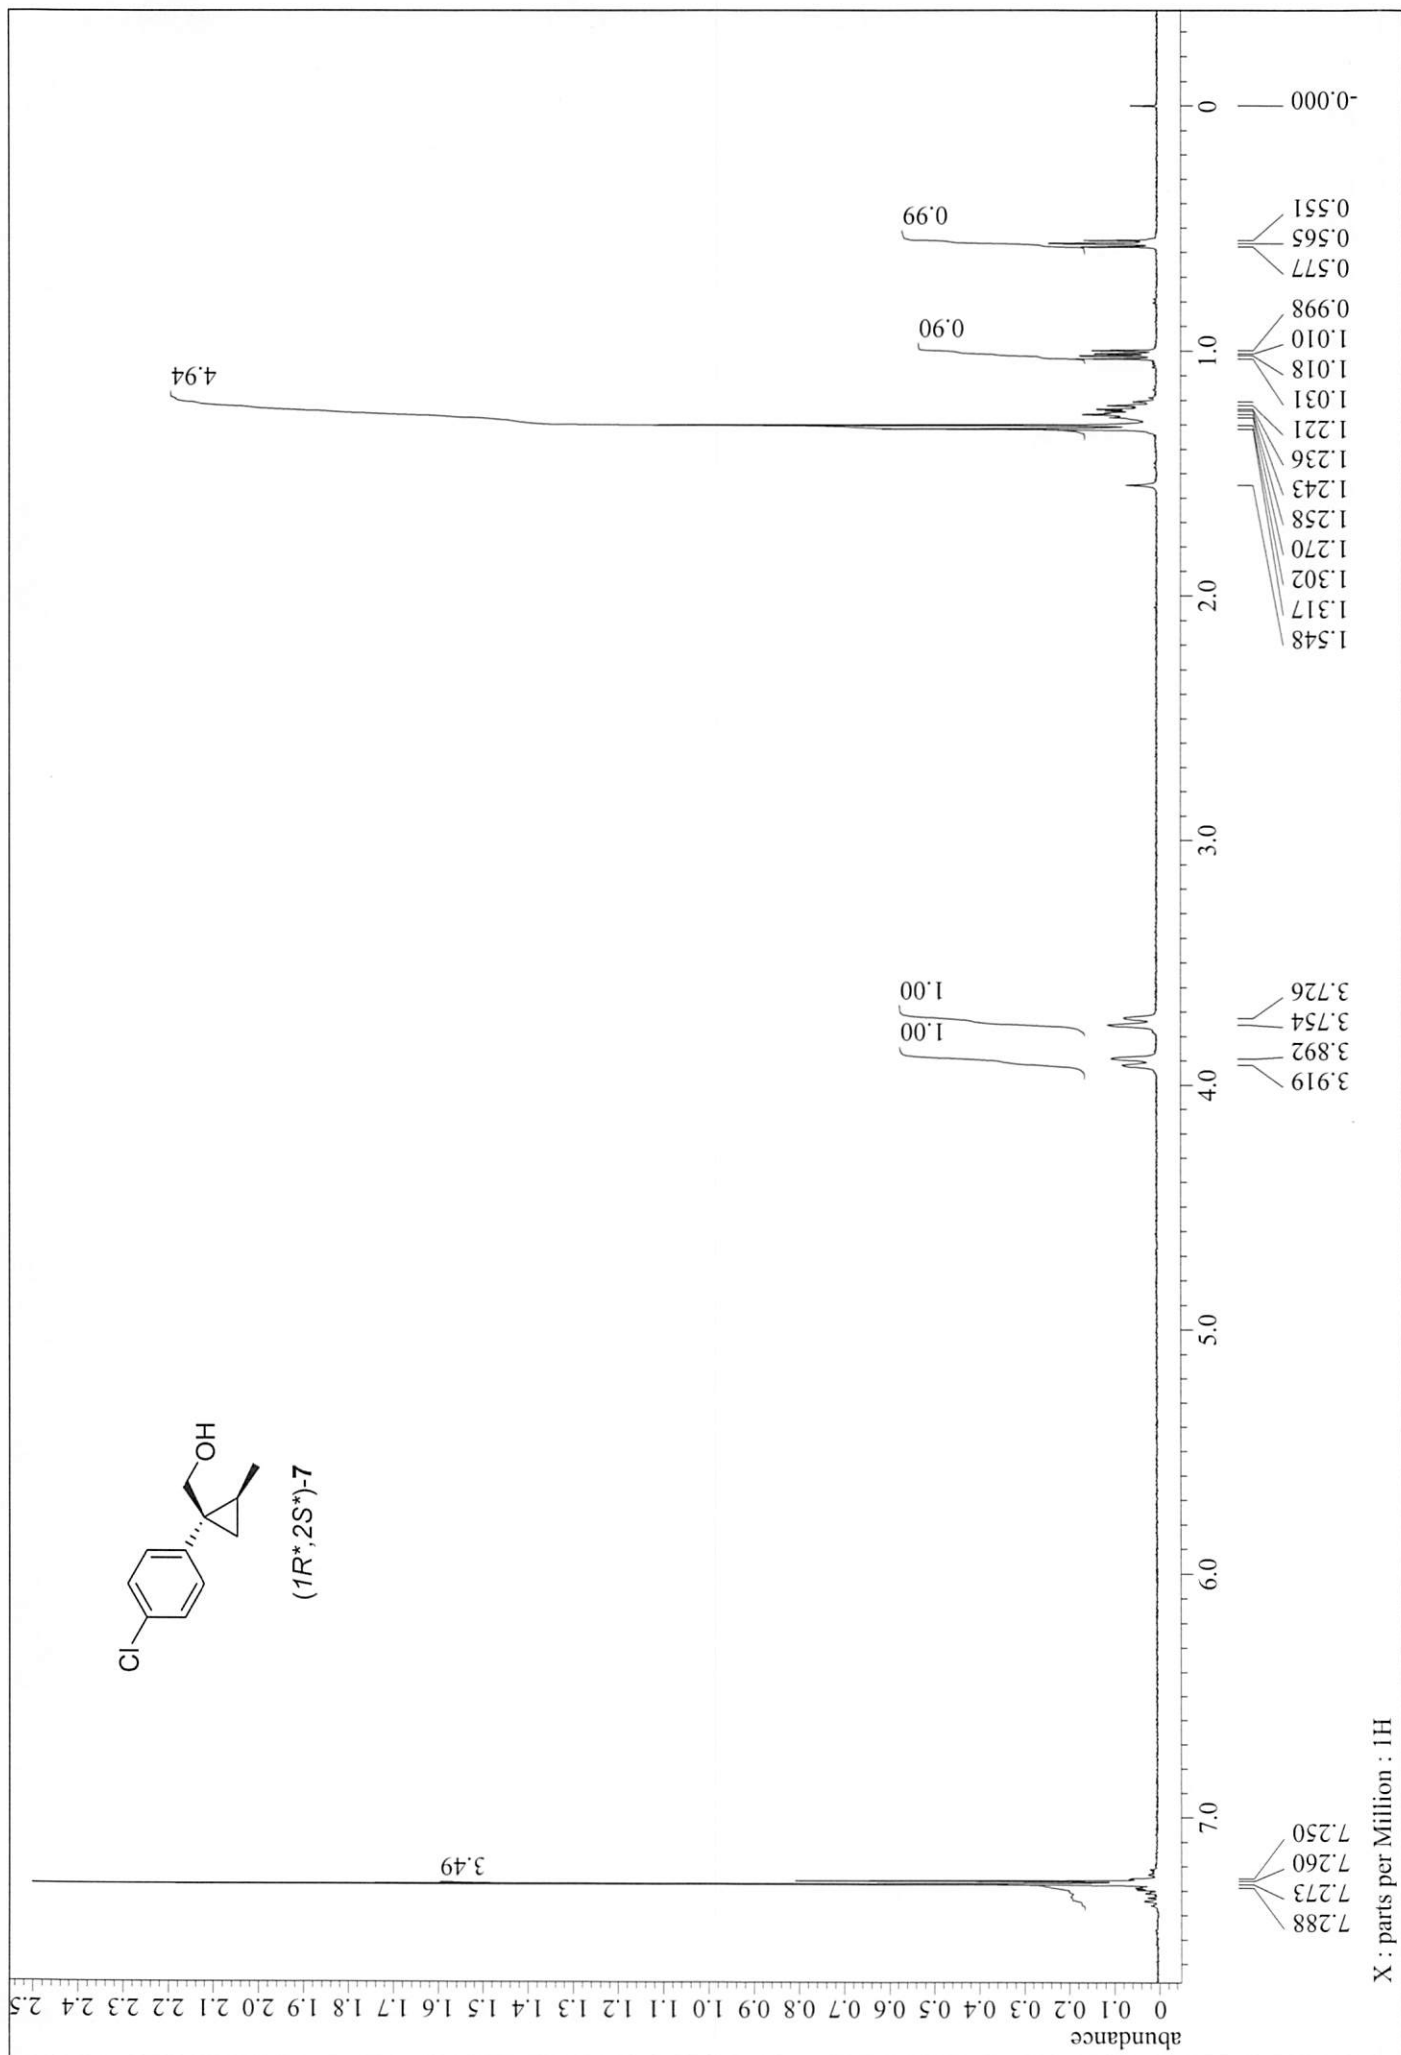

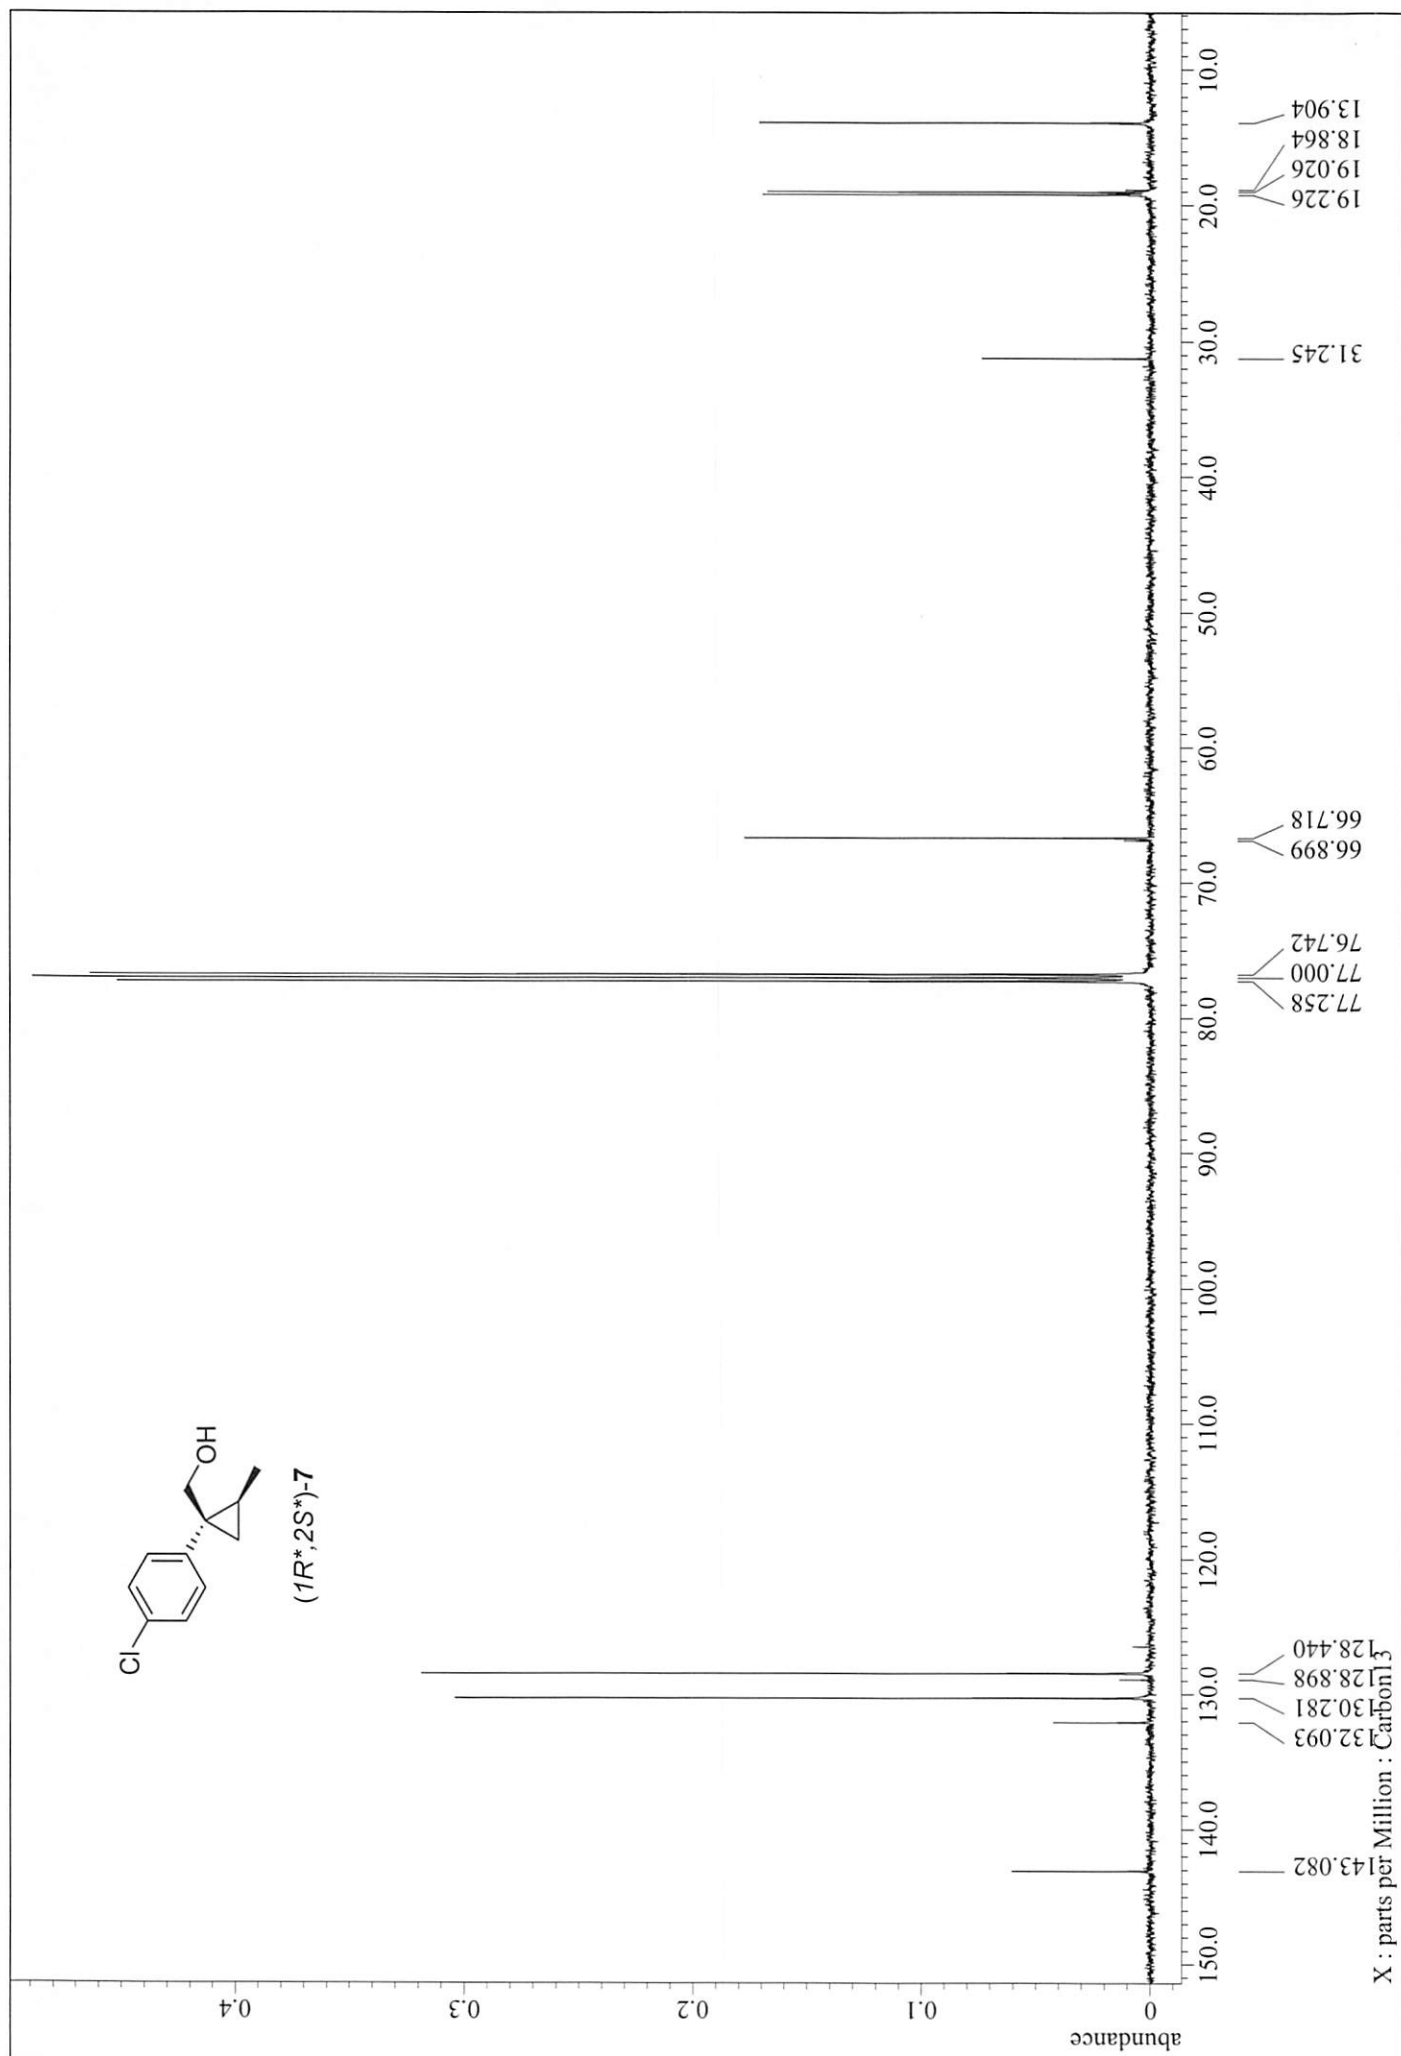

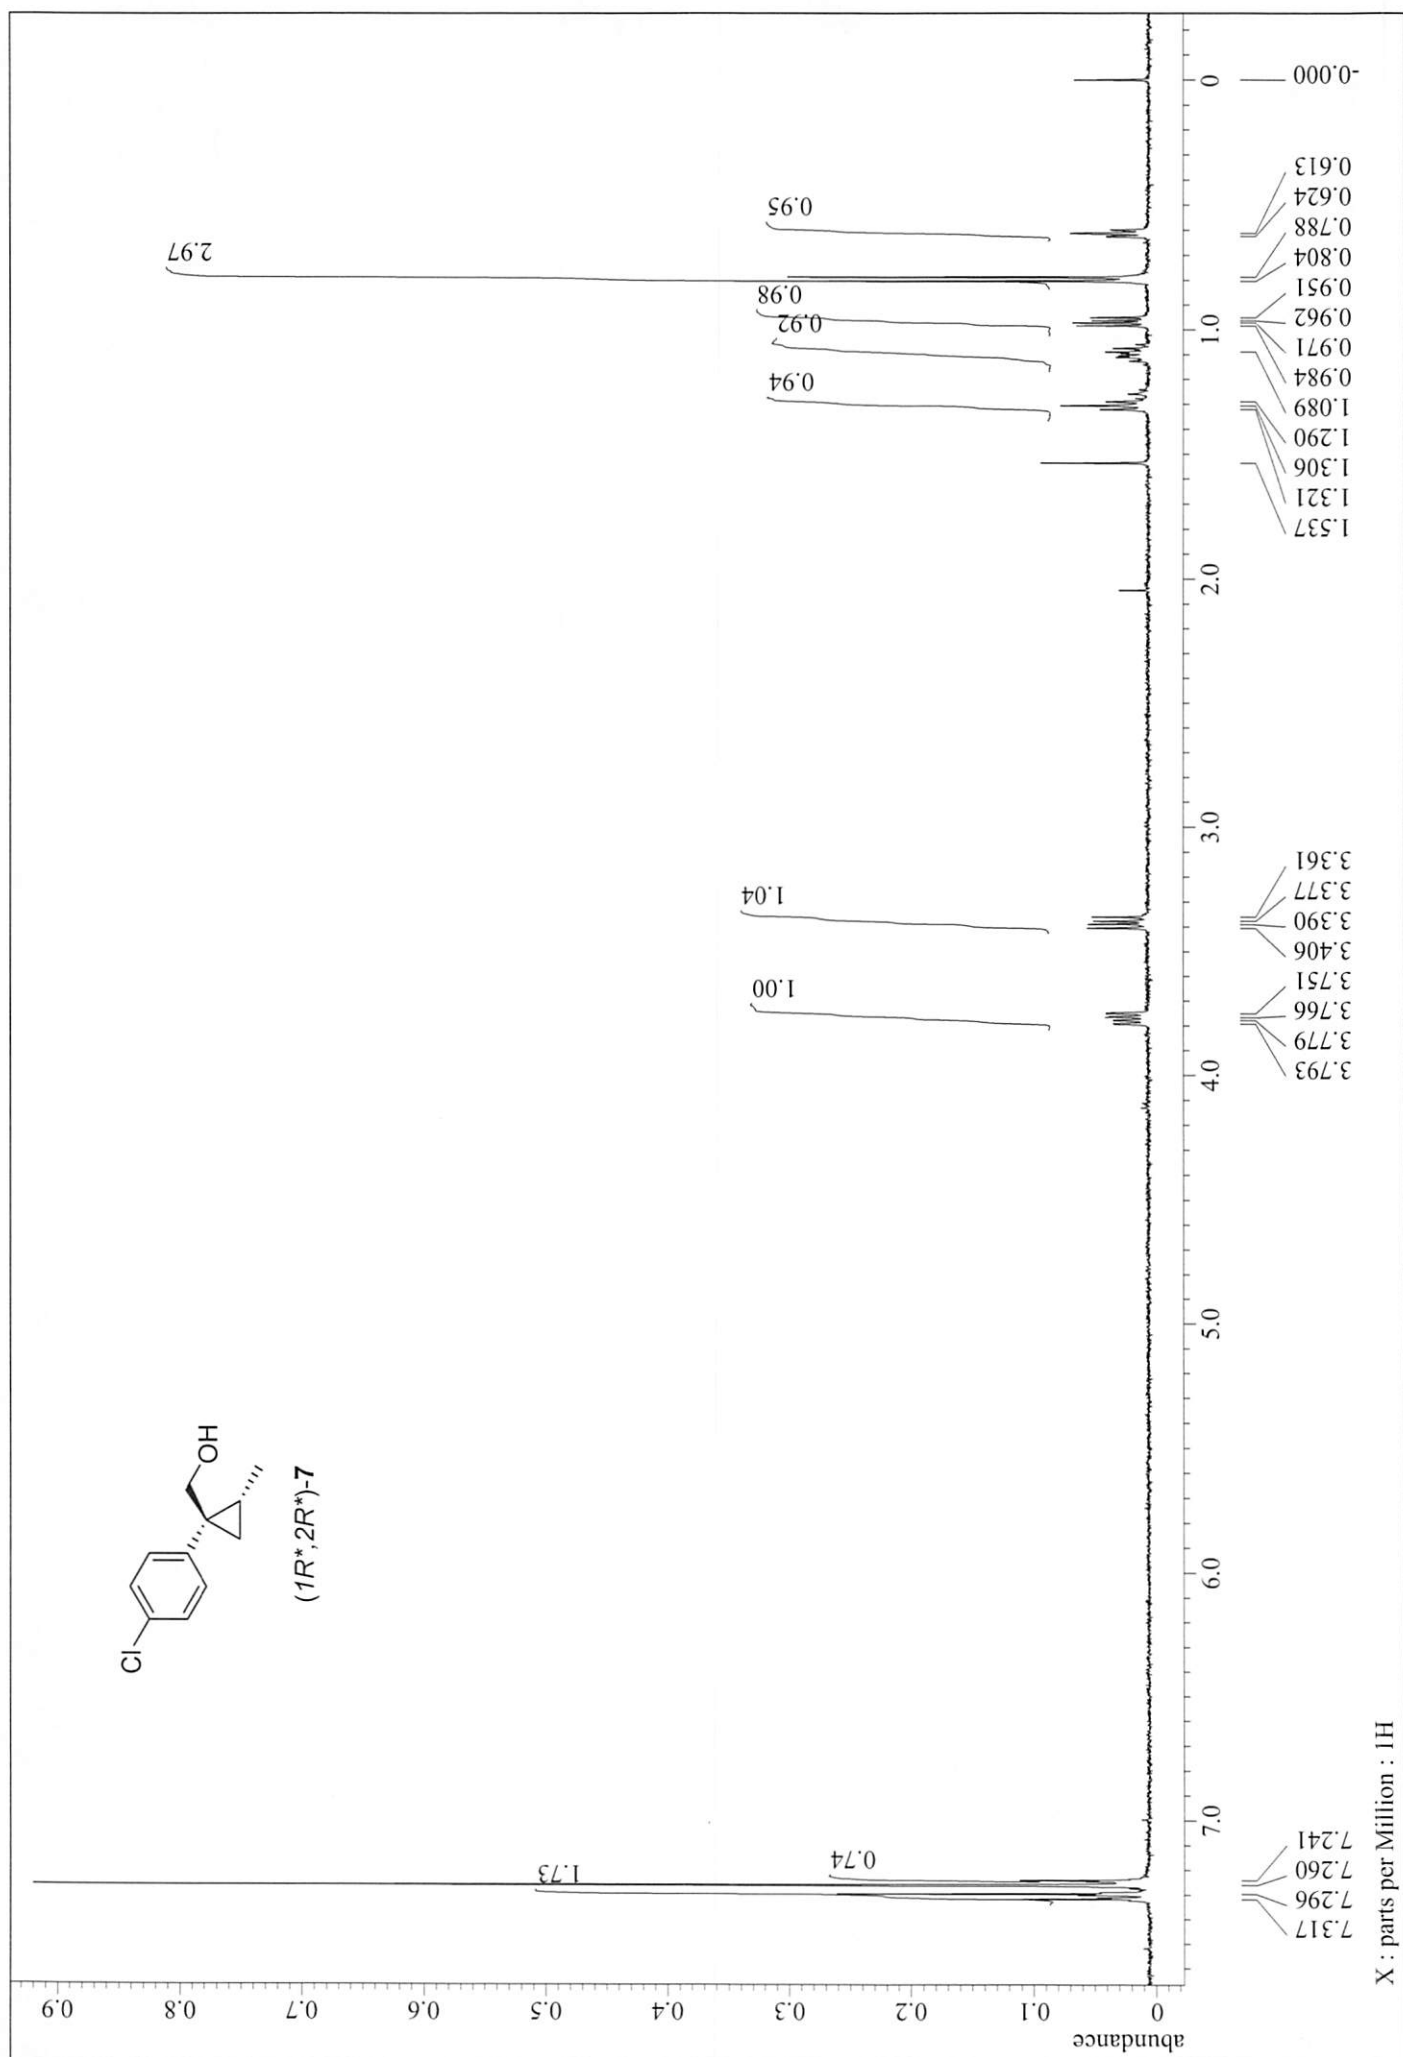

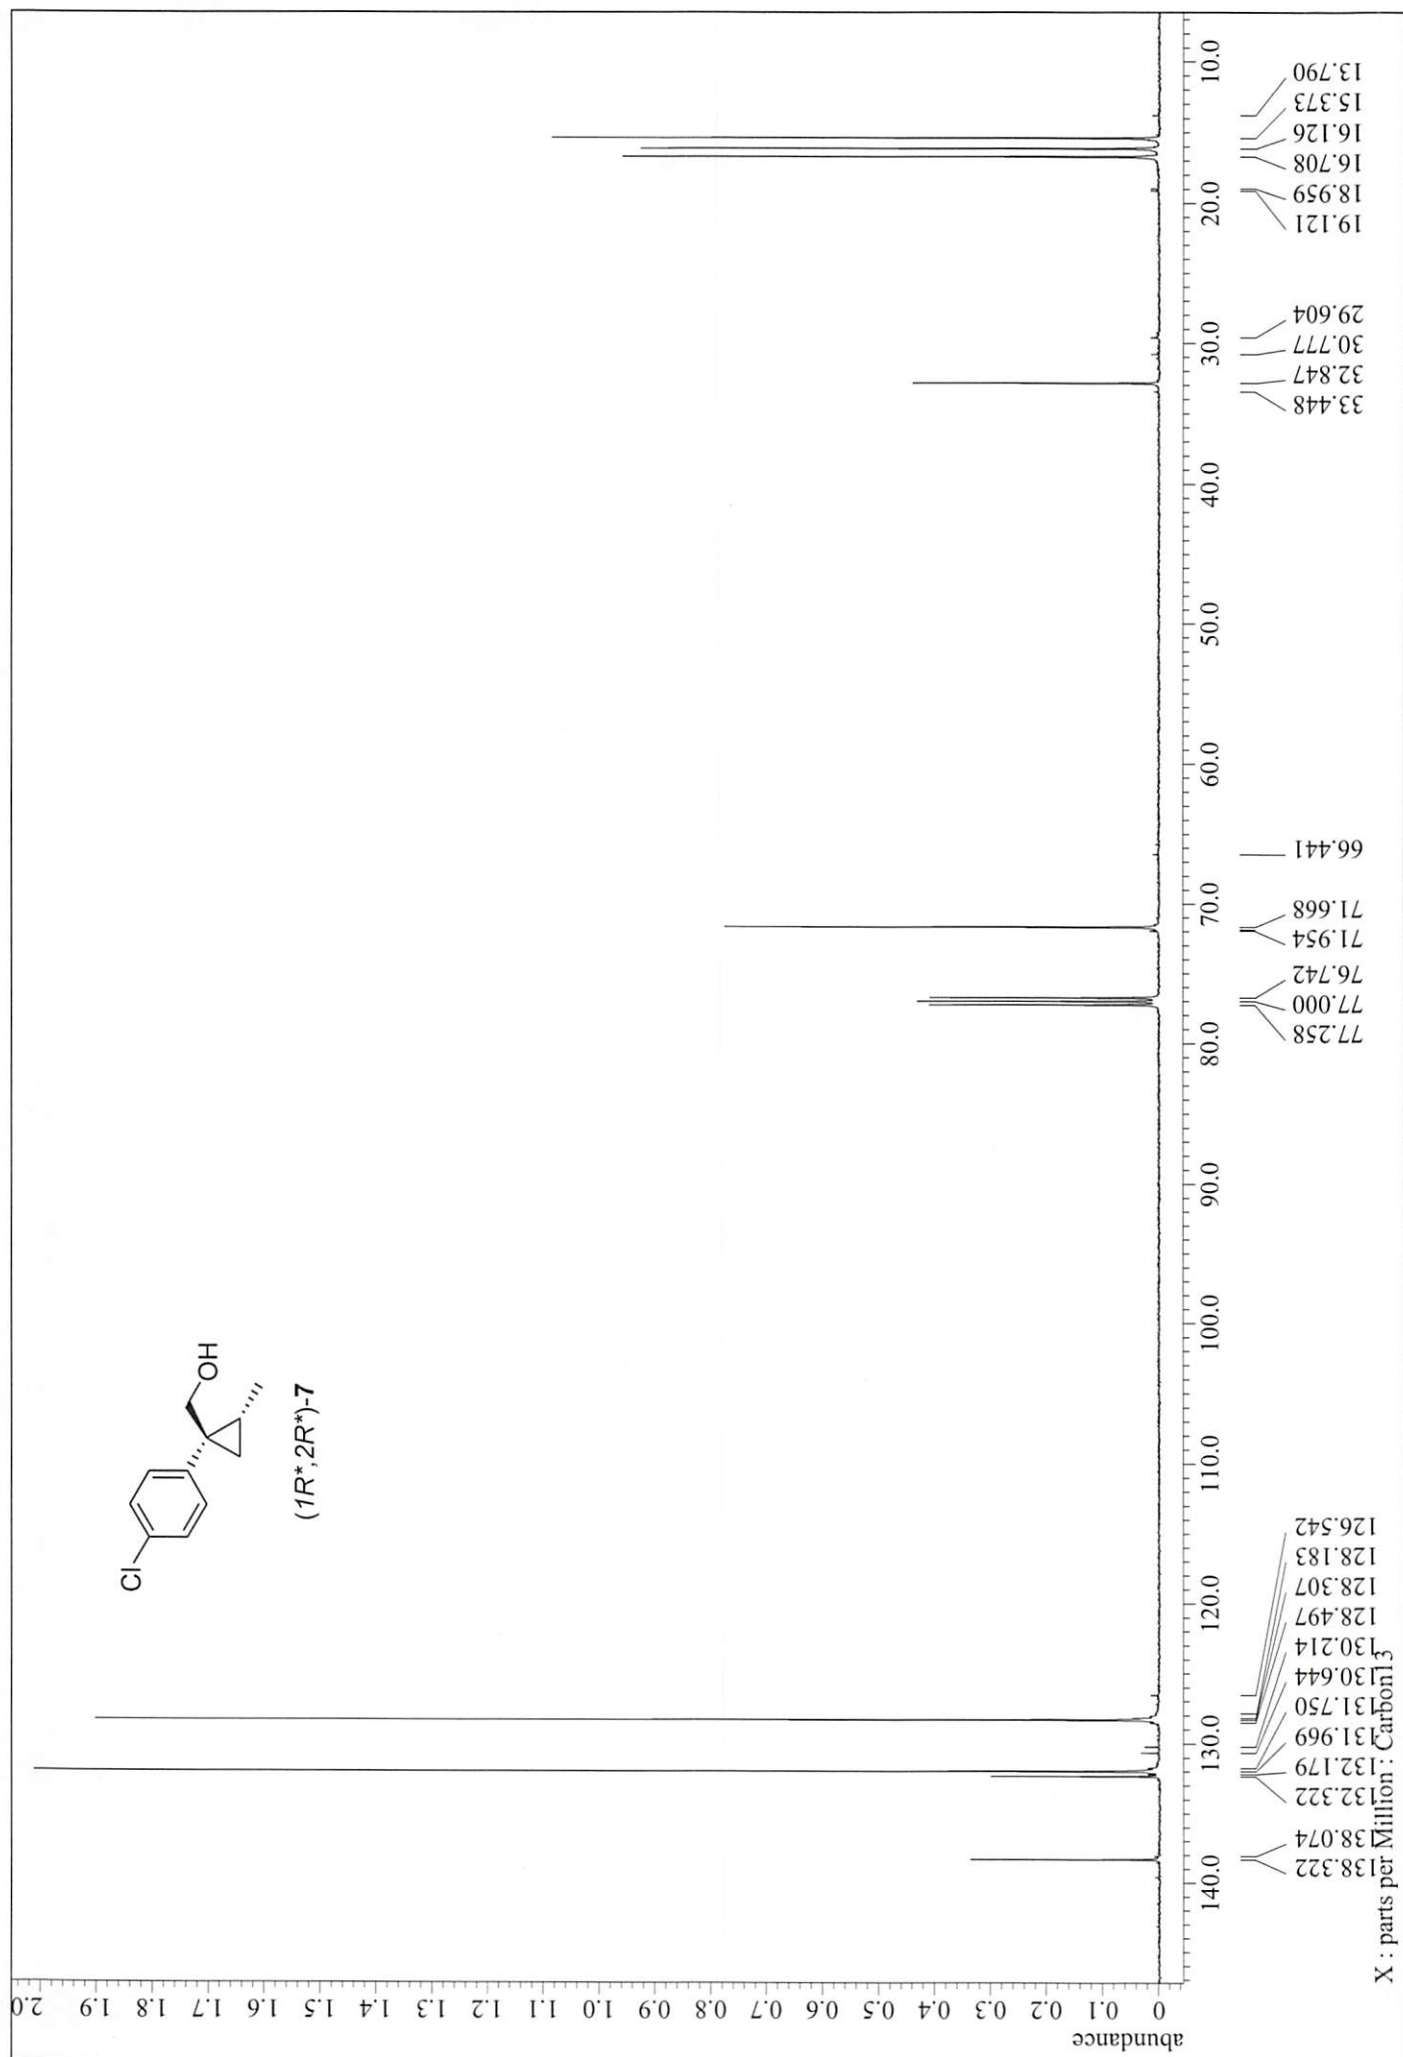

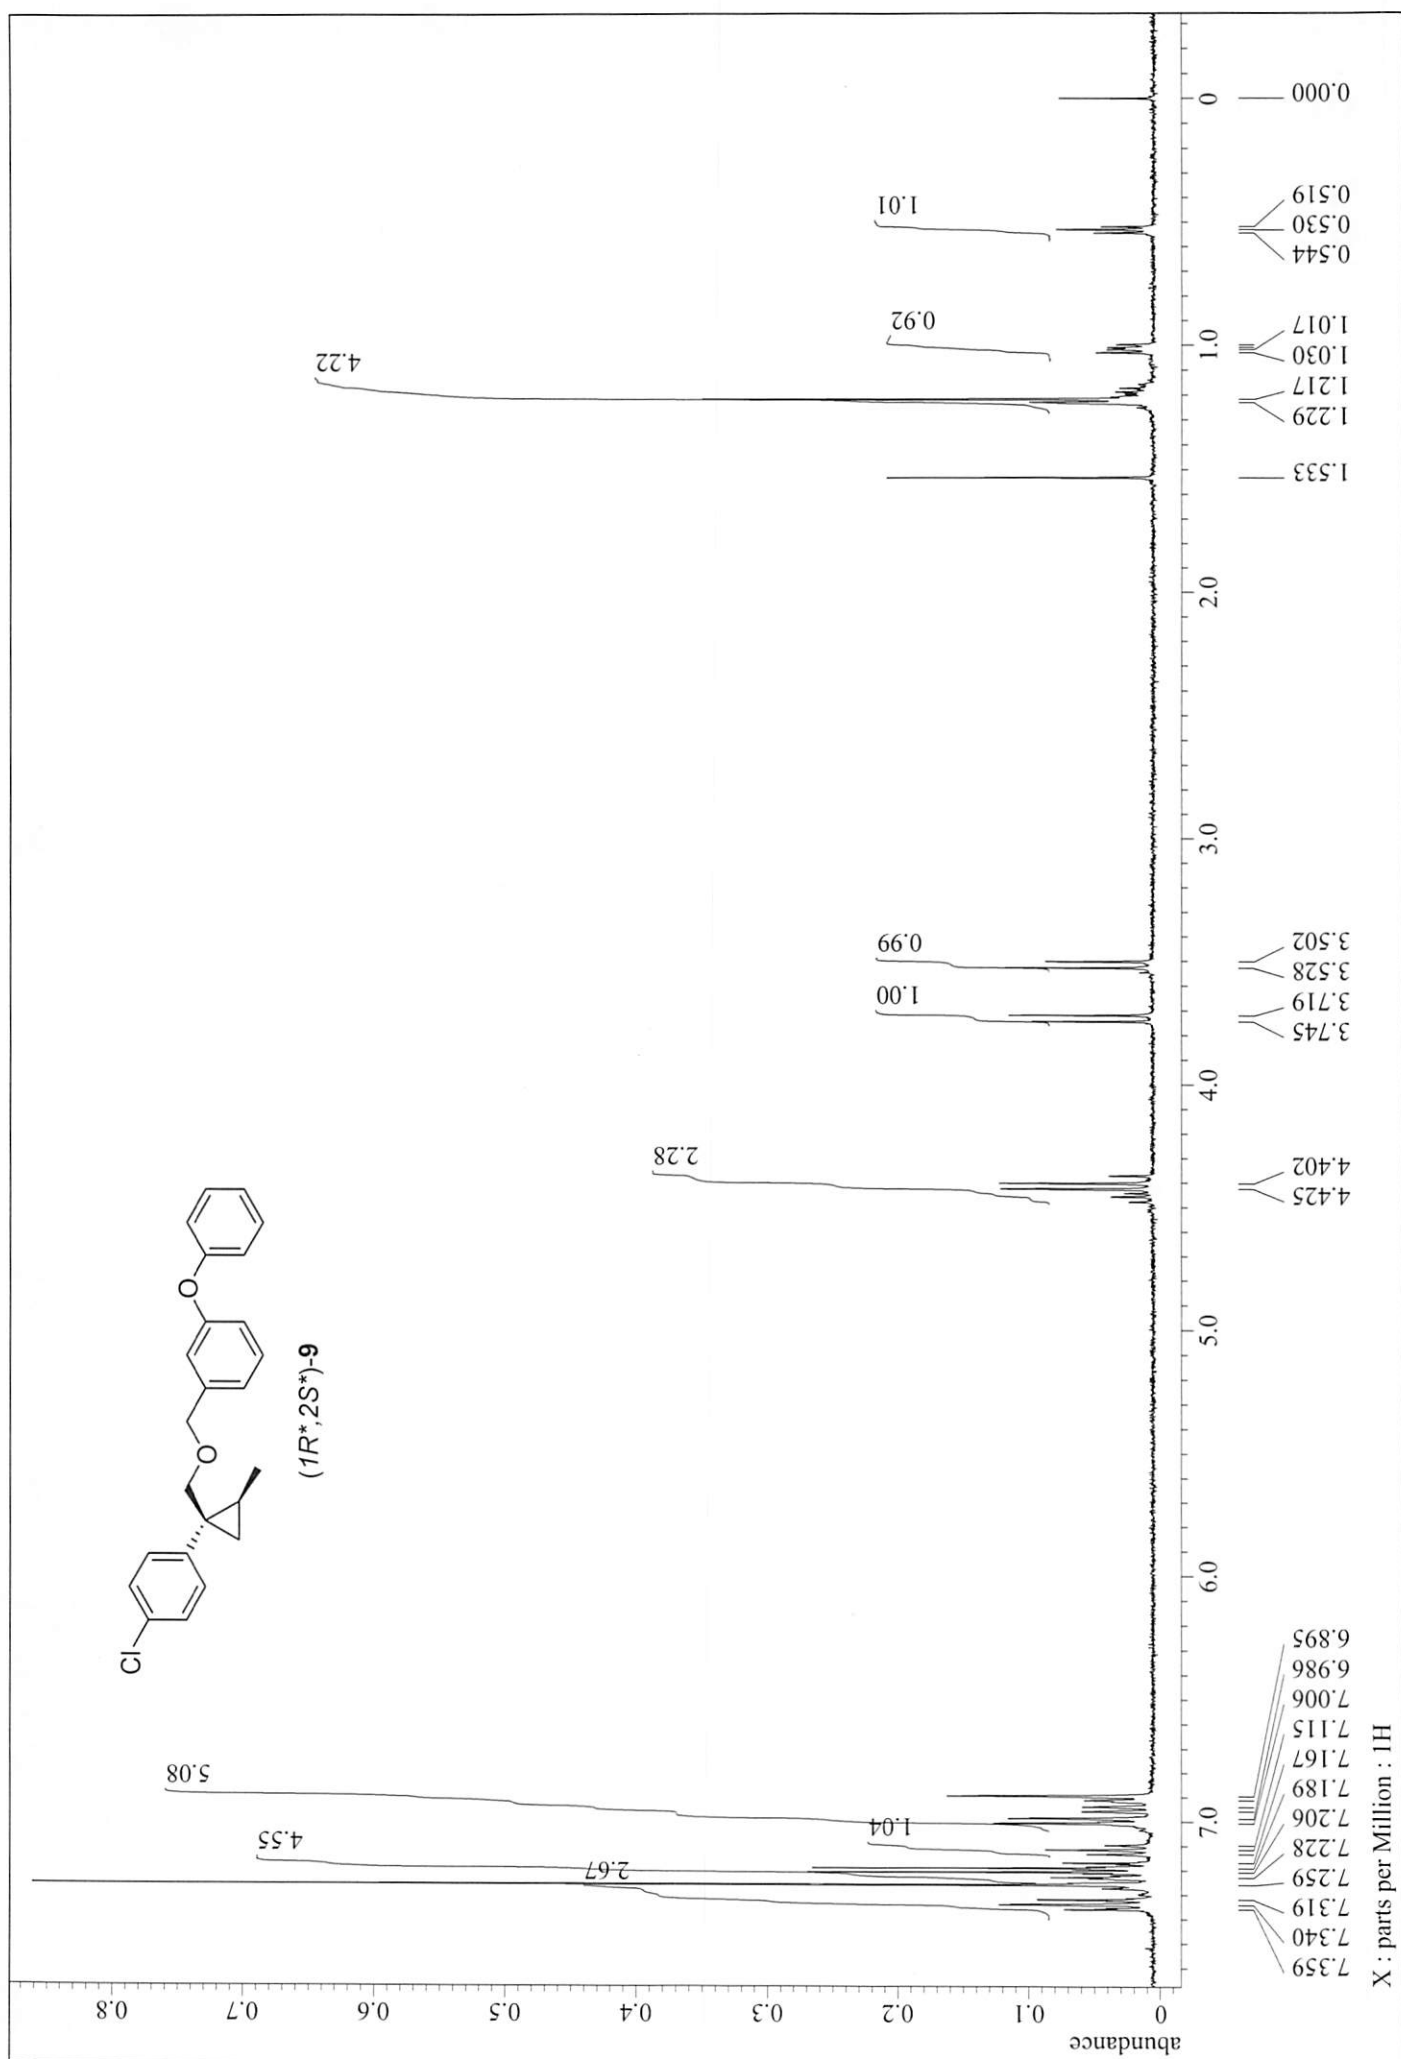

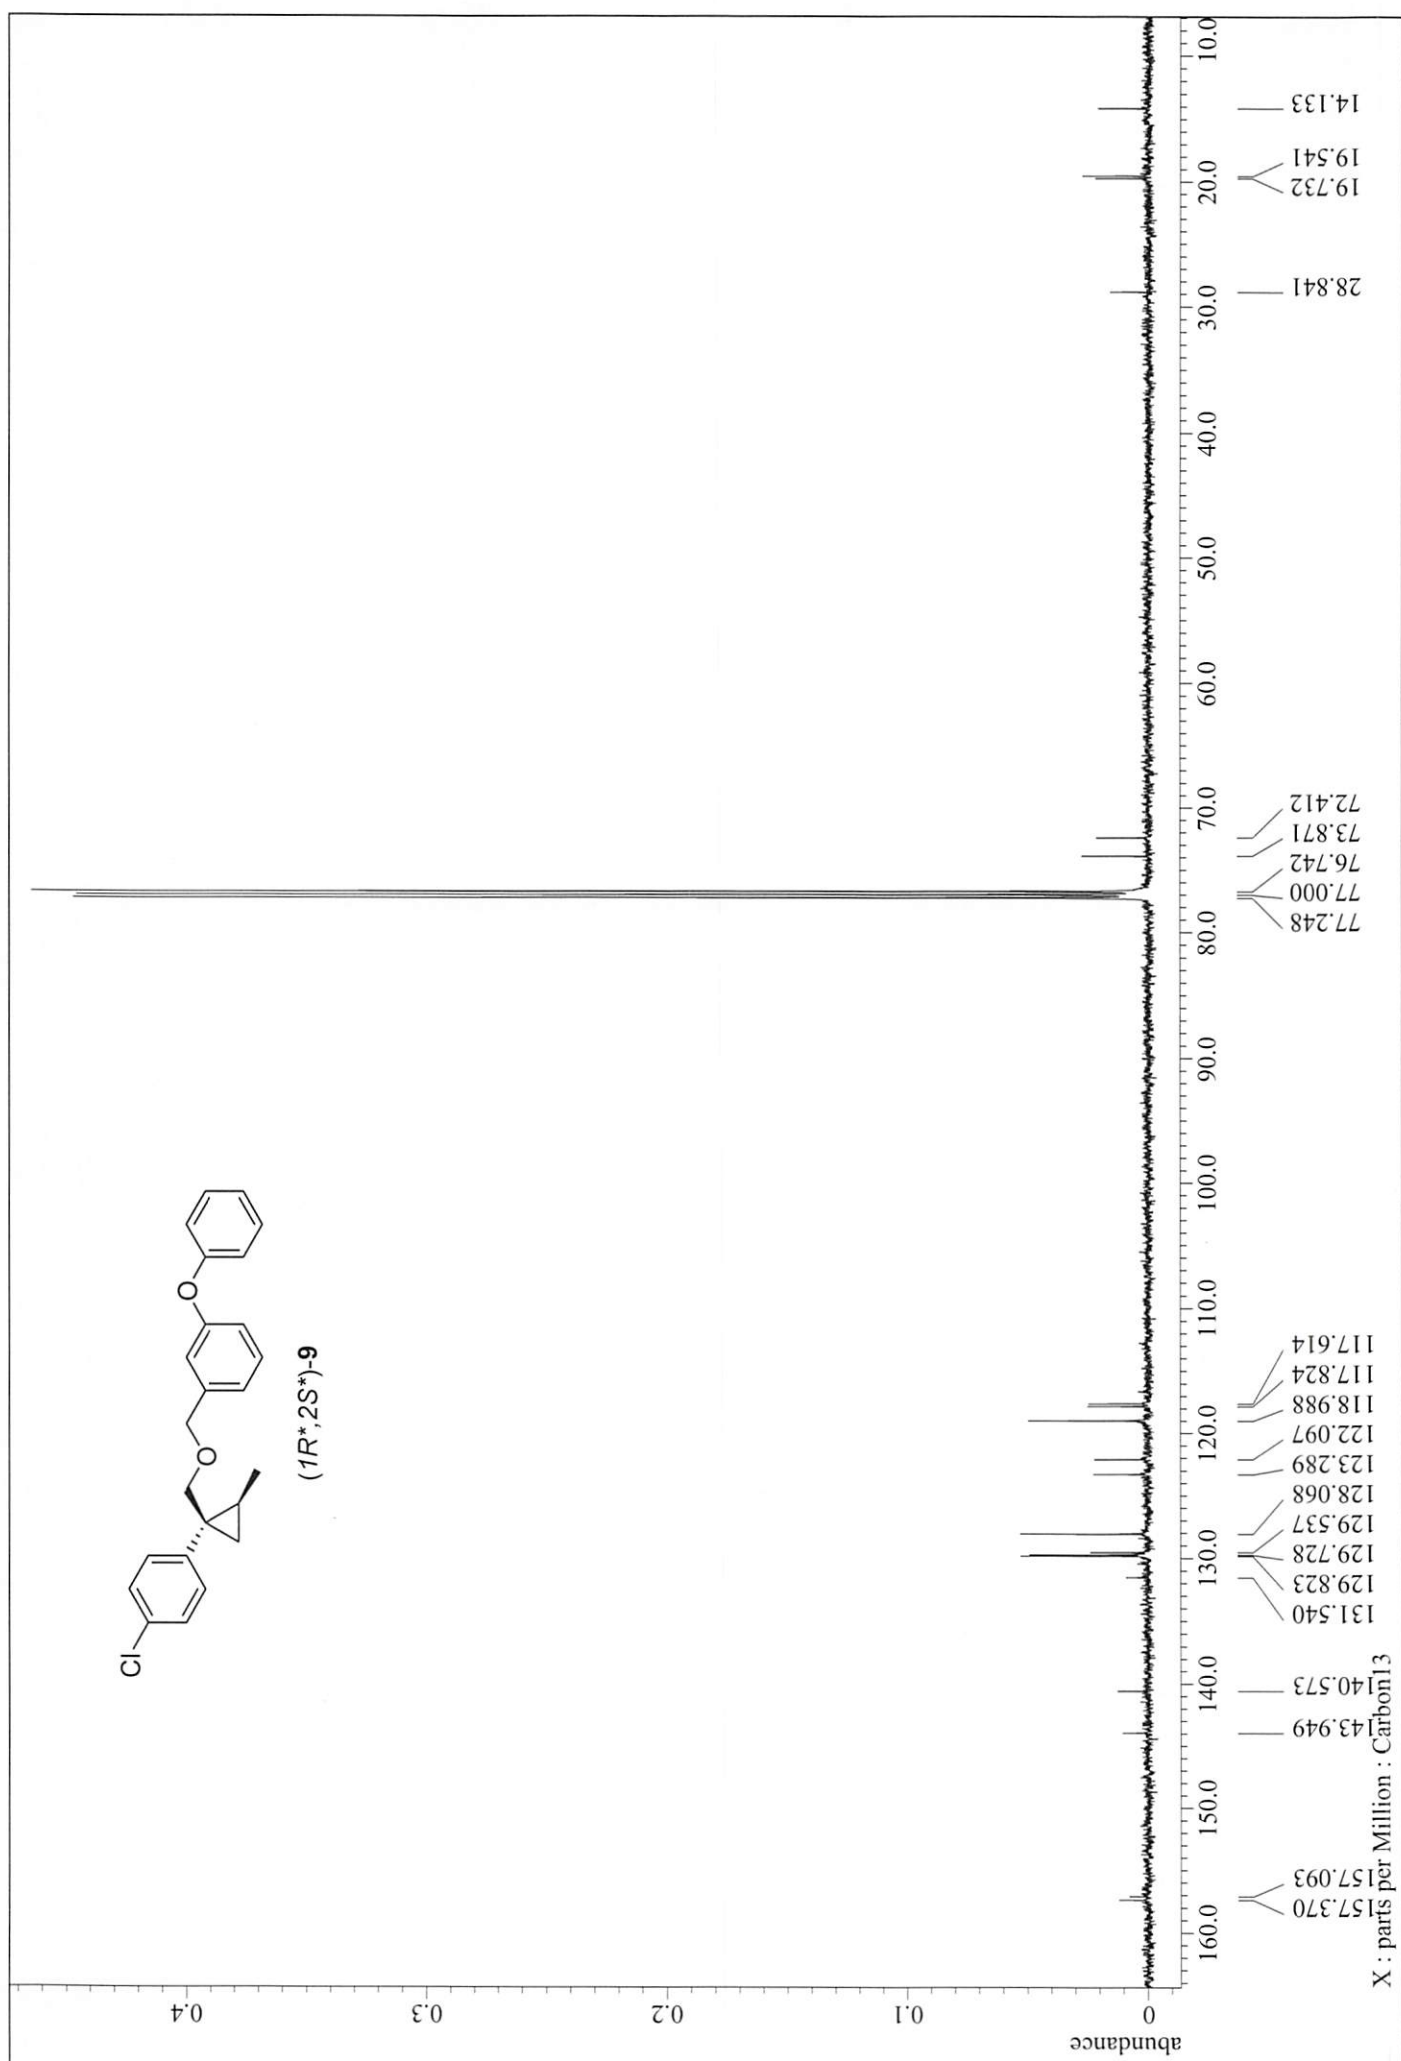

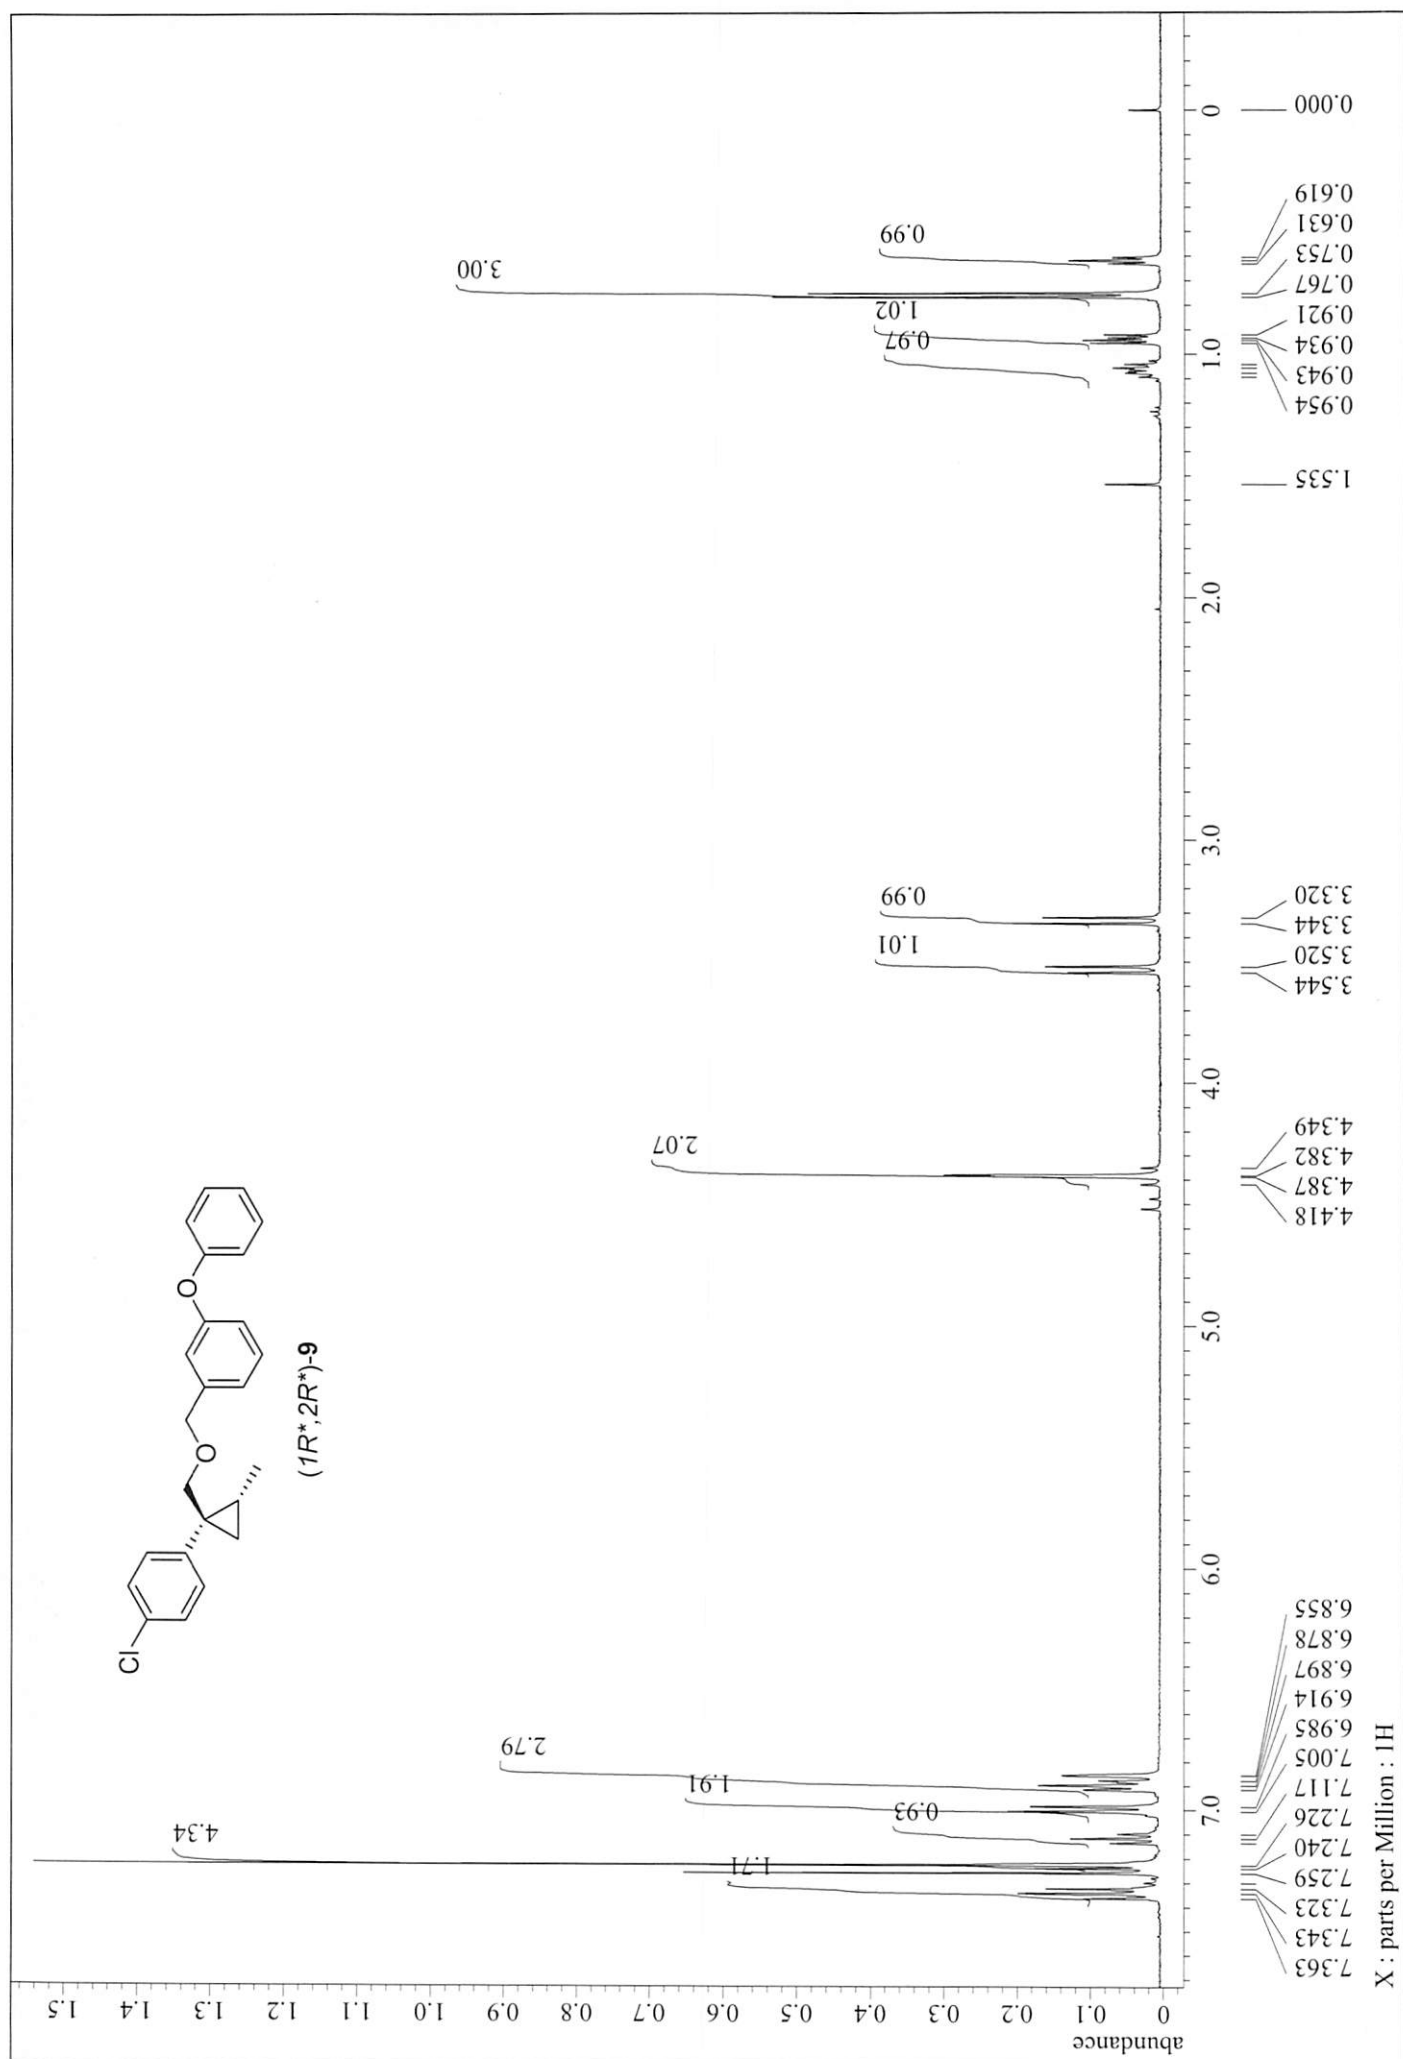

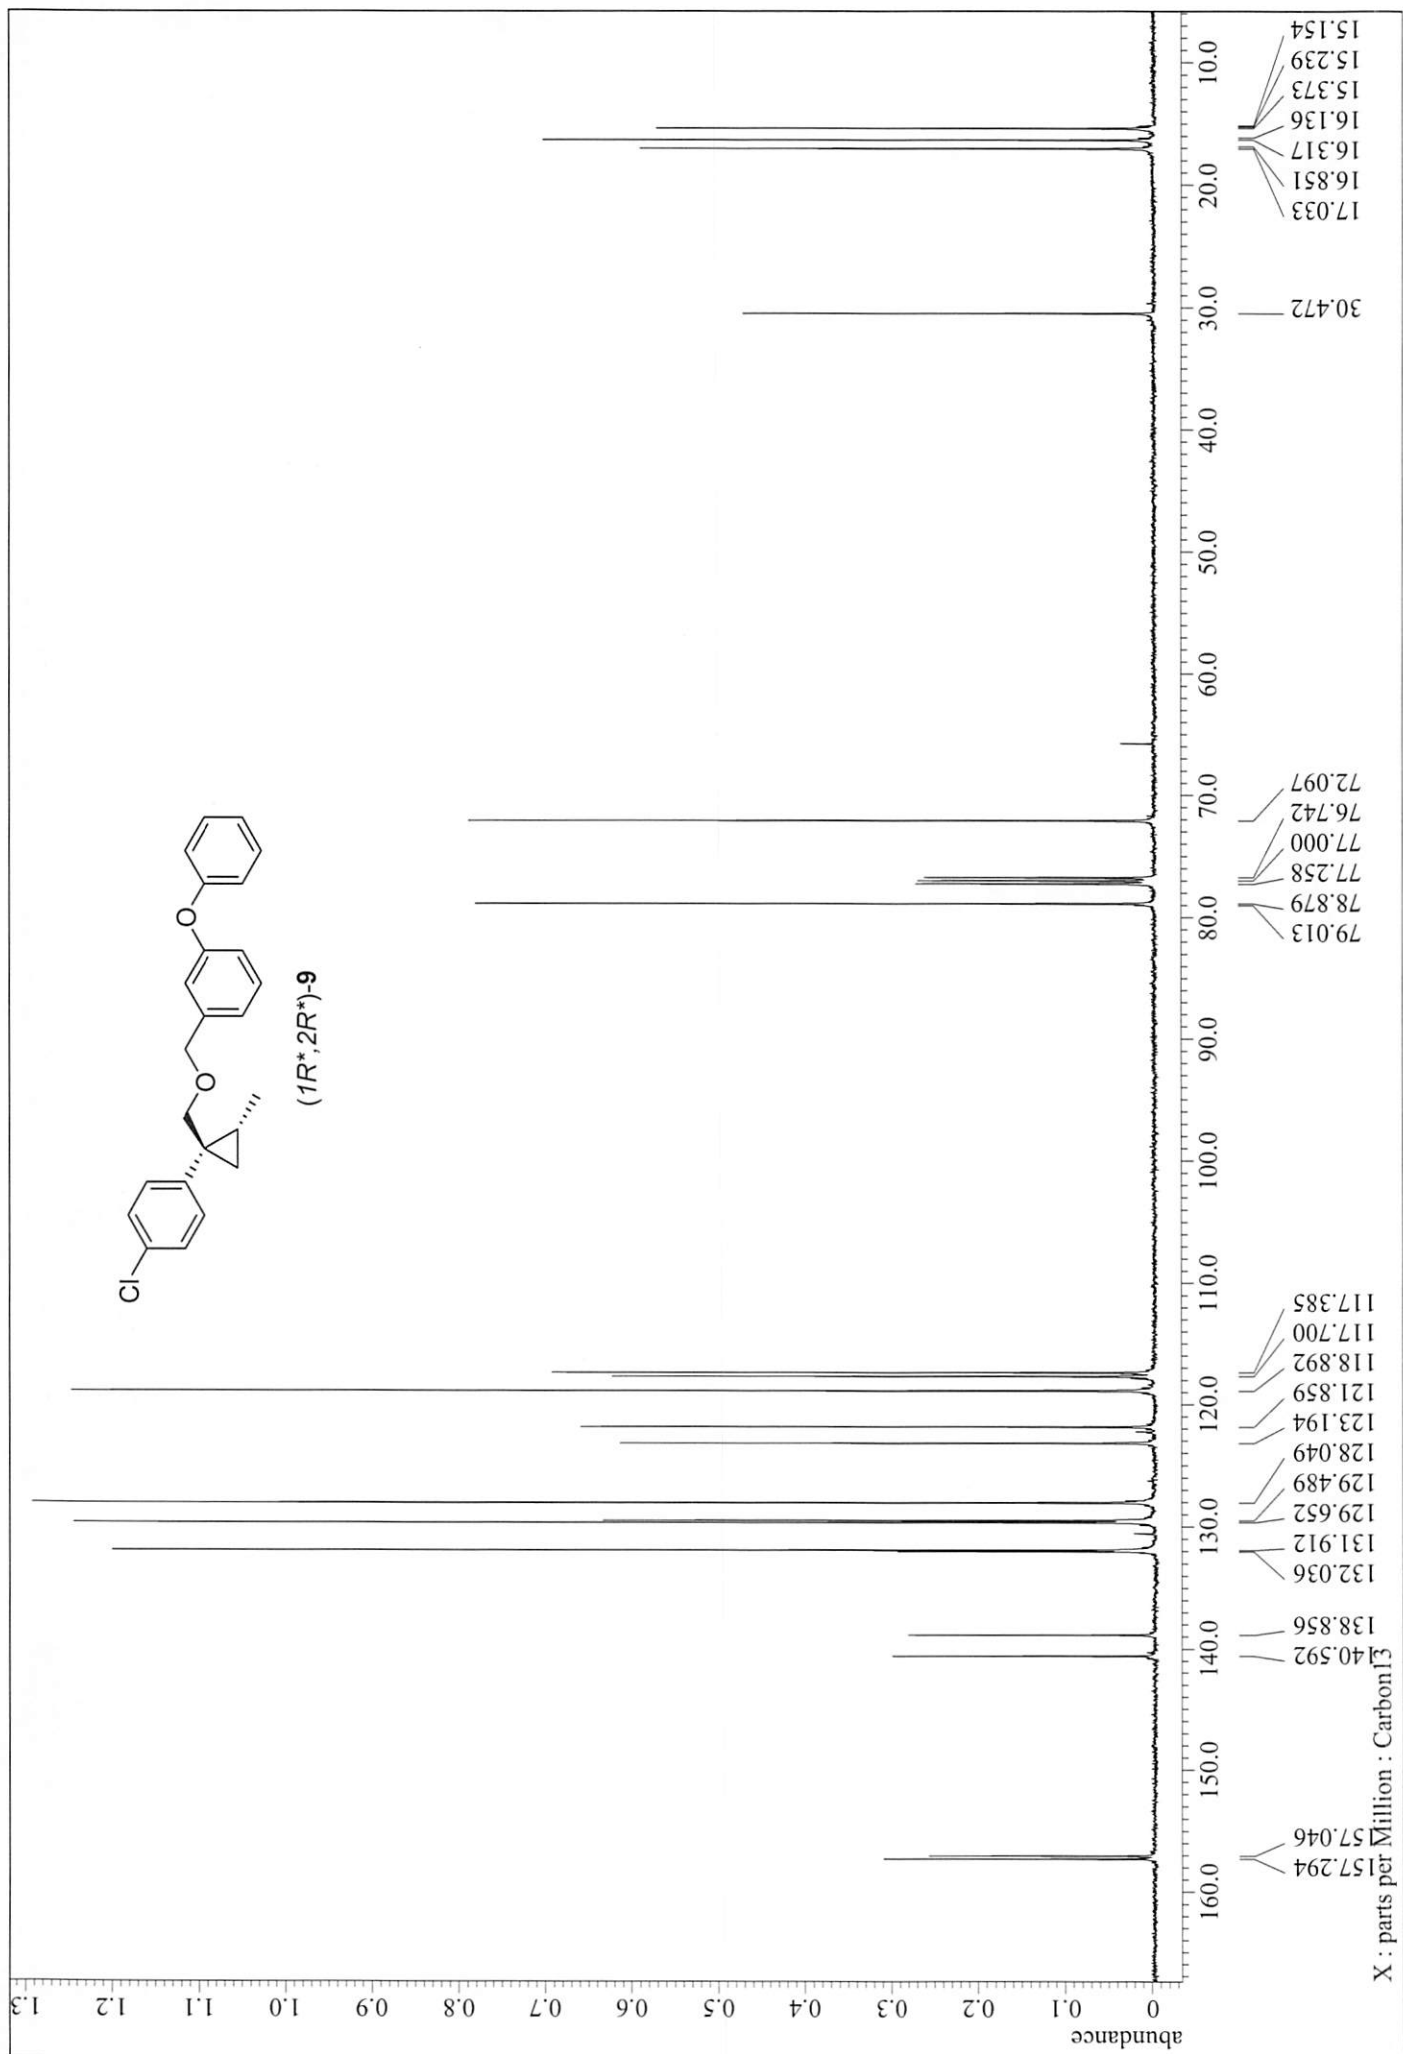



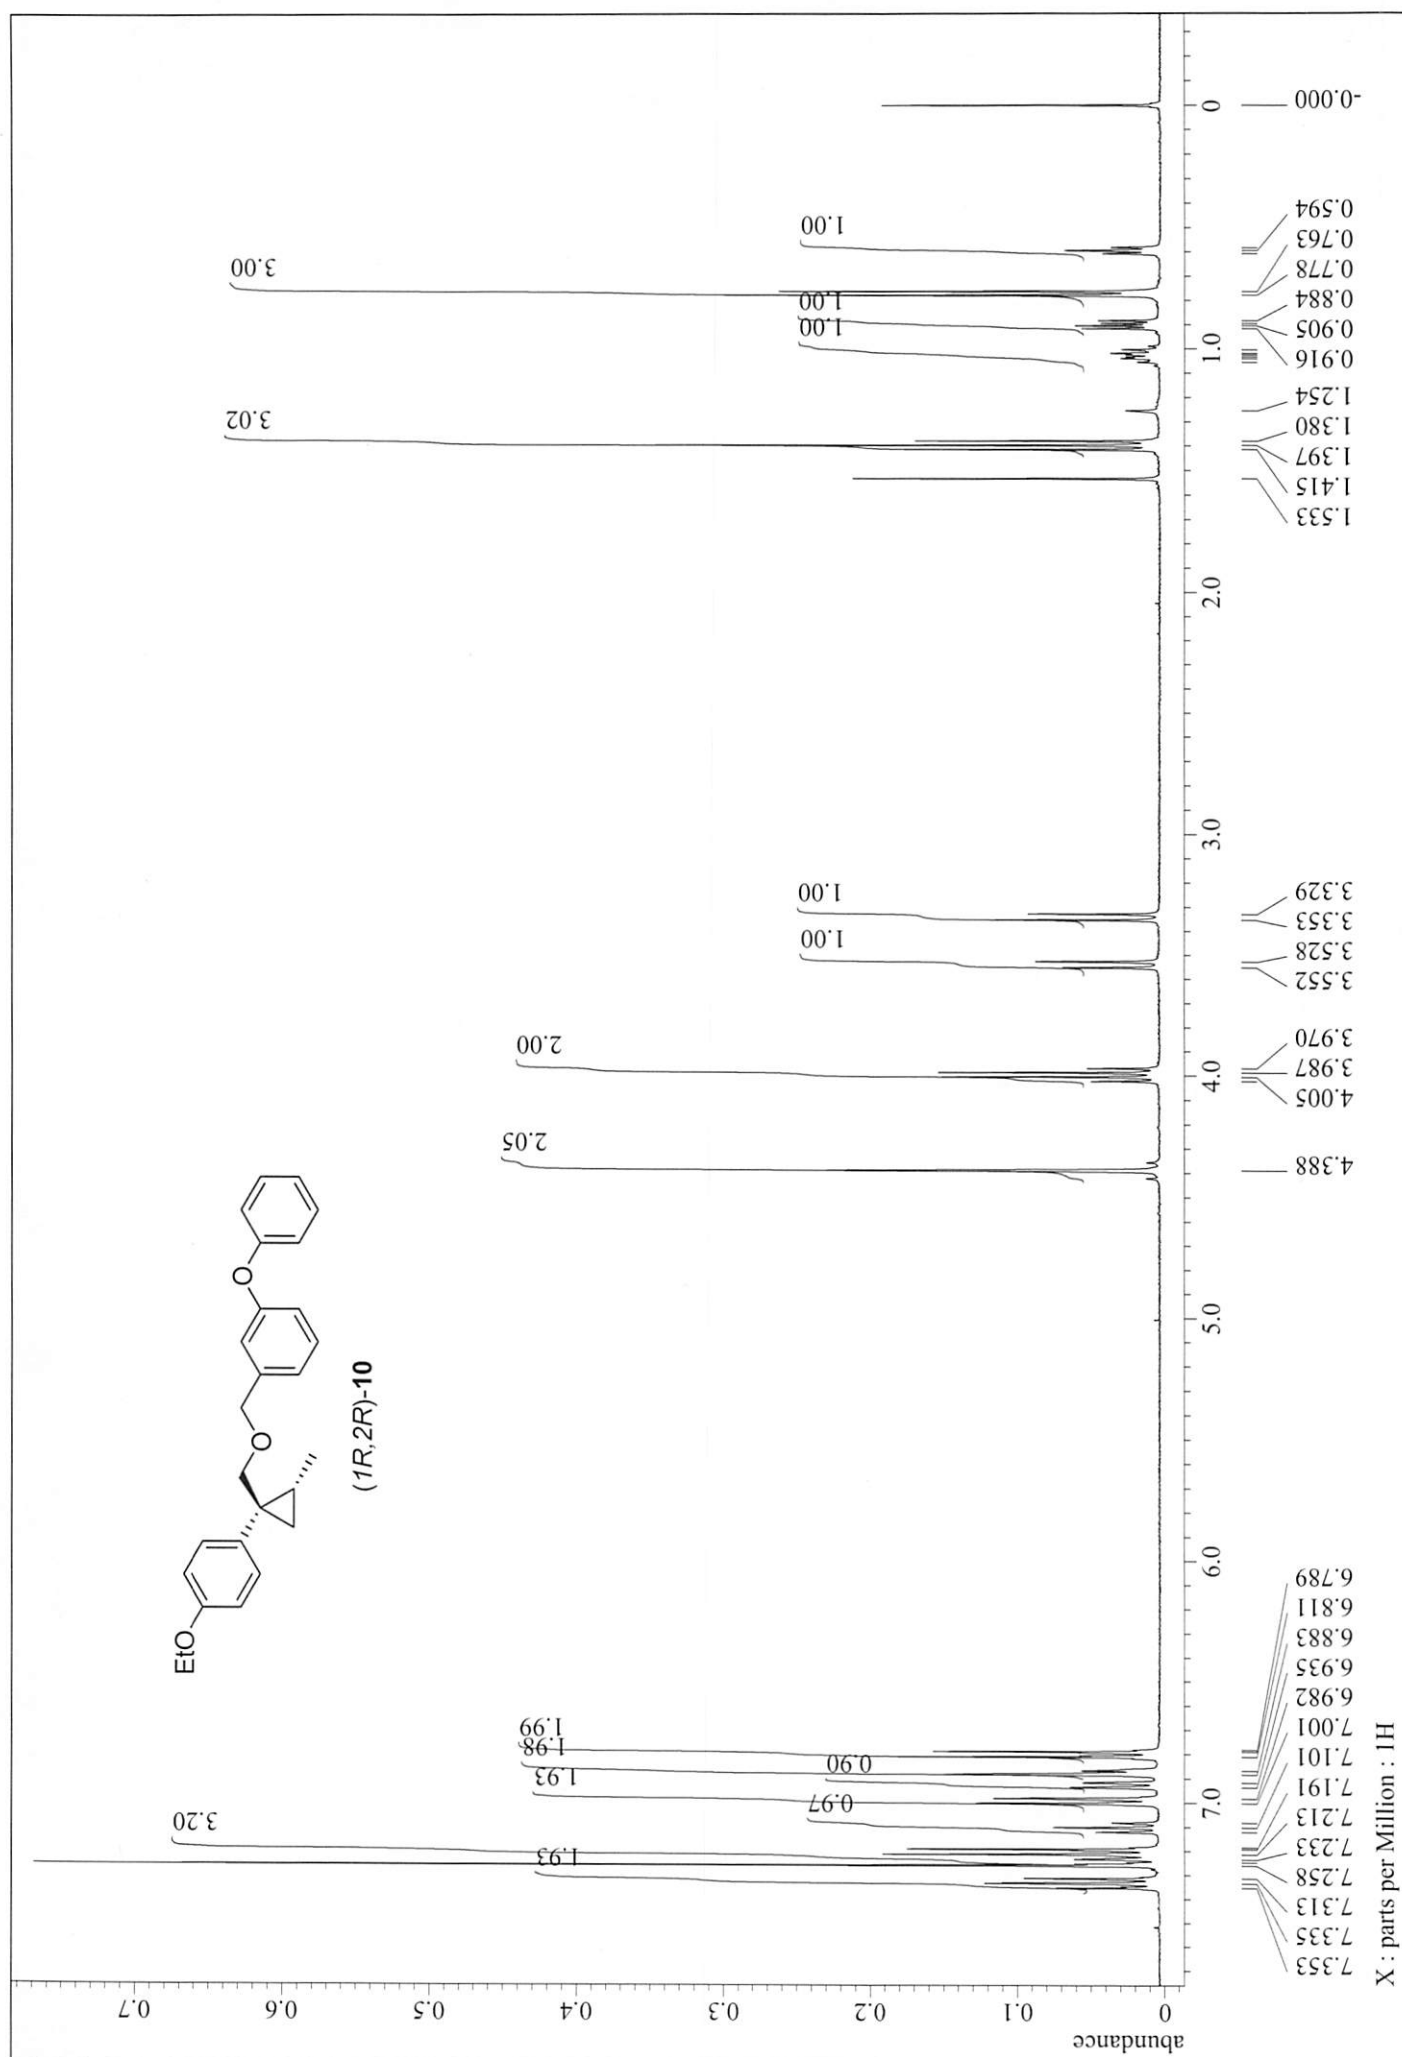

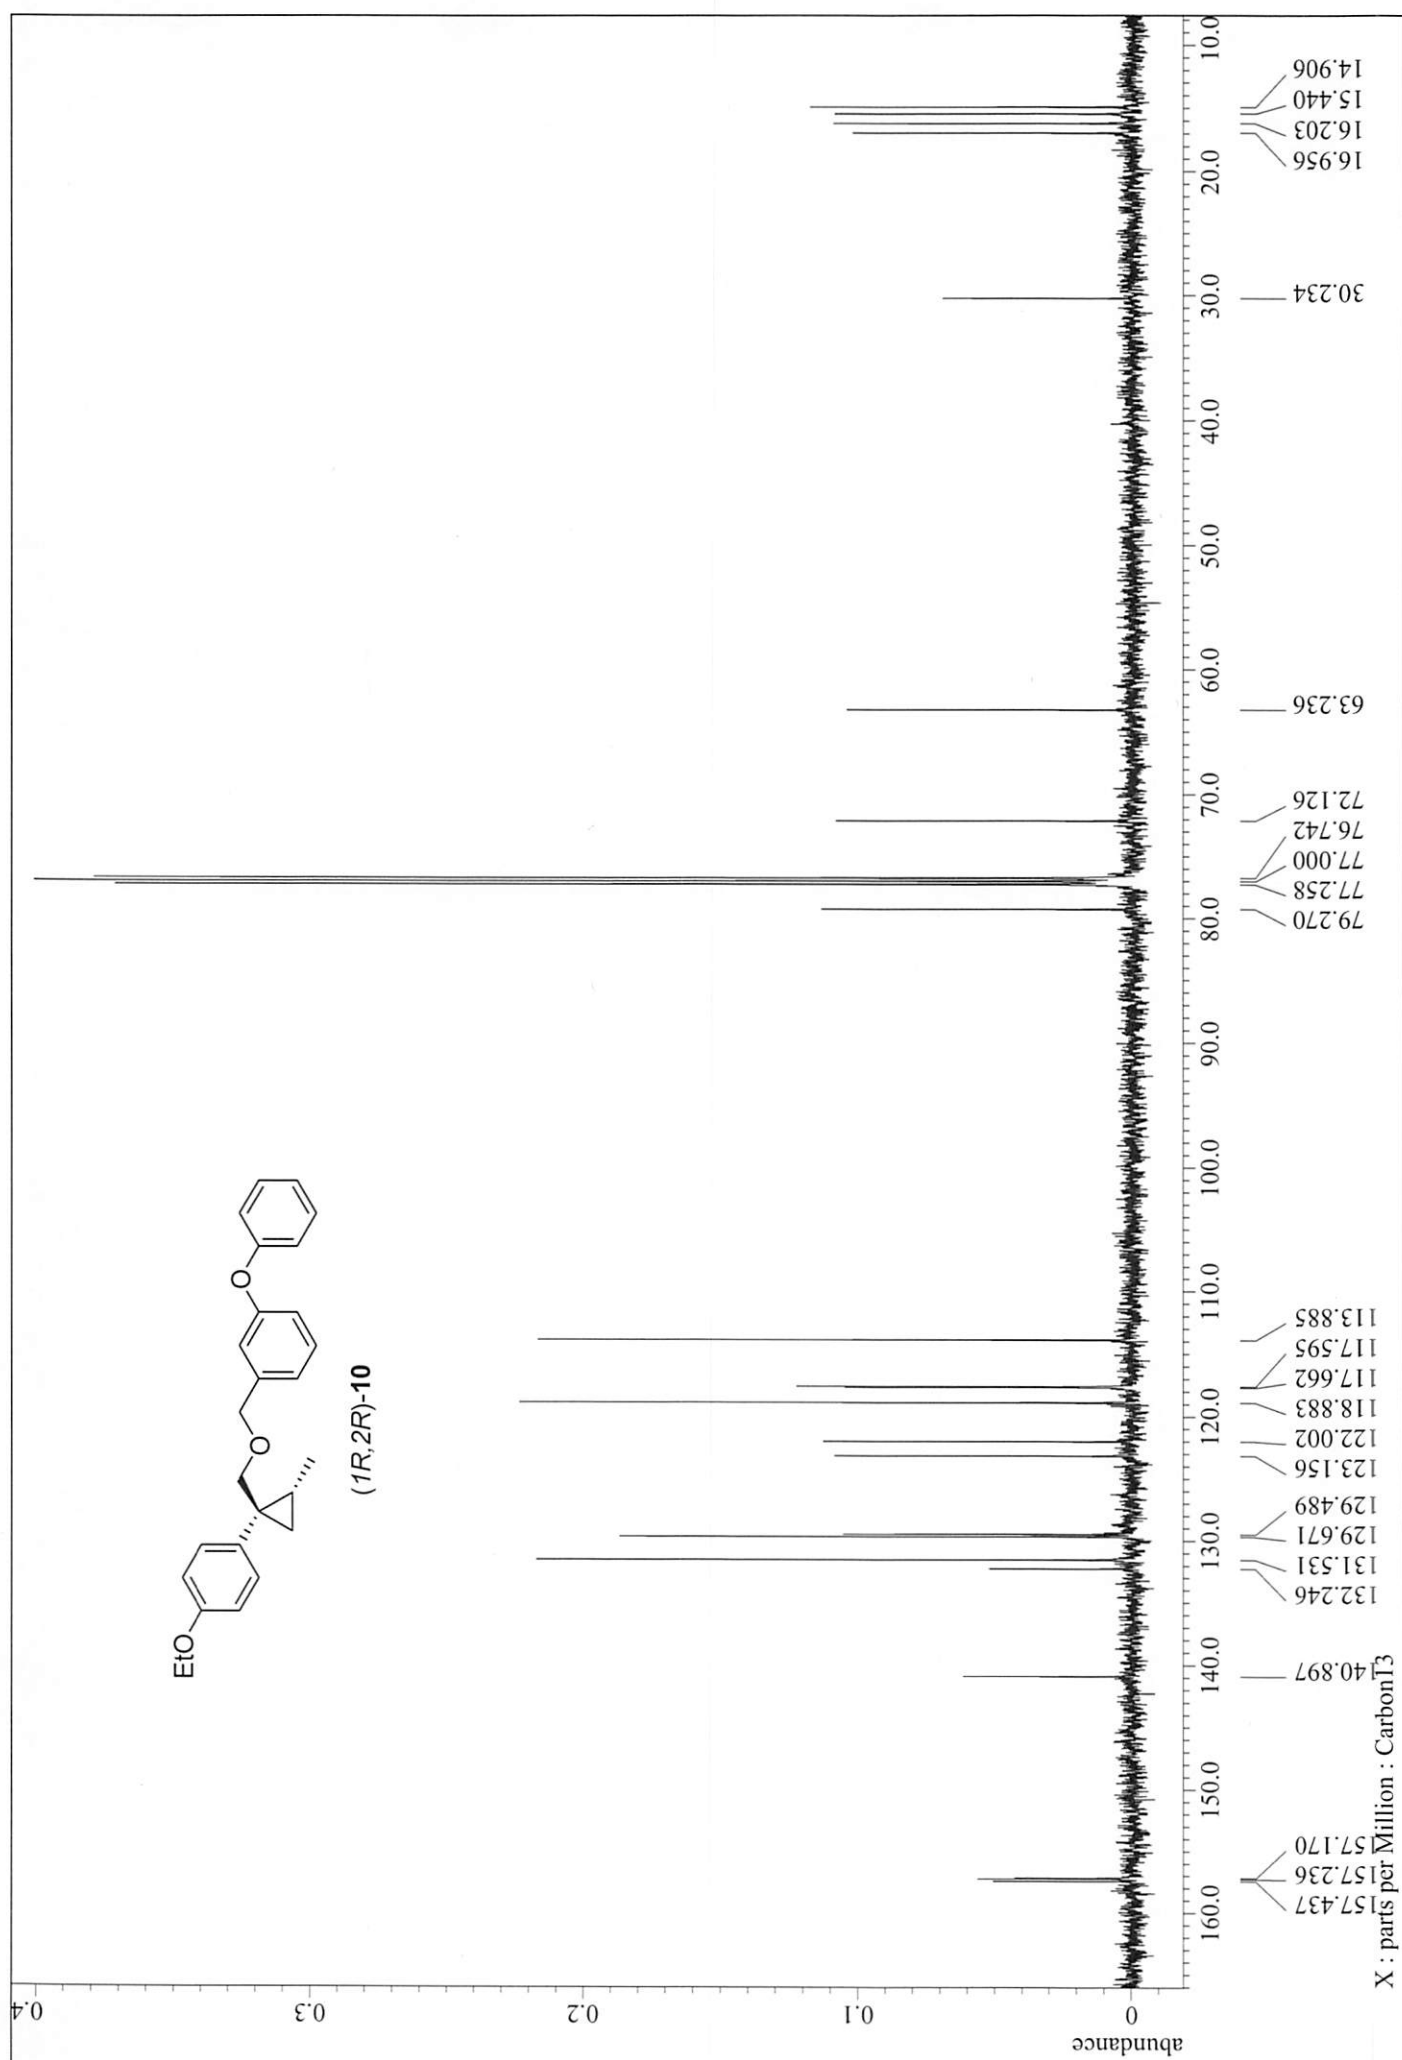

Supplement: s1 [file s1]
